1 **SARS-CoV-2 in schools: genome analysis shows that concurrent cases in the second**  
2 **and third wave were often unconnected**

3

4 Madlen Stange<sup>1,2,3,4¶</sup>, Eva Wuerfel<sup>5¶</sup>, Jelissa Katharina Peter<sup>6¶</sup>, Helena Seth-Smith<sup>1,2,3</sup>, Tim  
5 Roloff<sup>1,2,3</sup>, Severin Gsponer<sup>6</sup>, Alfredo Mari<sup>1,3</sup>, Blanca Cabrera Gil<sup>7</sup>, Aitana Lebrand<sup>7</sup>, Fanny  
6 Wegner<sup>1,2,3</sup>, Ulrich Heininger<sup>8</sup>, Julia Bielicki<sup>8</sup>, Sarah Tschudin Sutter<sup>9</sup>, Tanja Stadler<sup>3,10</sup>,  
7 Karoline Leuzinger<sup>11,12</sup>, Hans H. Hirsch<sup>9,11,12</sup>, Markus Ledergerber<sup>5</sup>, Simon Fuchs<sup>6</sup>, Adrian  
8 Egli<sup>1,2\*</sup>

9 <sup>1</sup> Applied Microbiology Research, Department of Biomedicine, University of Basel, Basel,  
10 Switzerland

11 <sup>2</sup> Division of Clinical Bacteriology and Mycology, University Hospital Basel, Basel, Switzerland

12 <sup>3</sup> SIB Swiss Institute of Bioinformatics - Basel, Switzerland

13 <sup>4</sup> Centre for Molecular Biodiversity Research, Leibniz Institute for the Analysis of Biodiversity  
14 Change / ZFMK, Museum Koenig, Bonn, Germany

15 <sup>5</sup> Child and Youth Health Service, Department of Health Basel-City, Basel, Switzerland

16 <sup>6</sup> Department of Health Basel-City, Basel, Switzerland

17 <sup>7</sup> SIB Swiss Institute of Bioinformatics - Geneva, Switzerland

18 <sup>8</sup> Pediatric Infectious Diseases, Children's University Hospital Basel and University of Basel,  
19 Basel, Switzerland

20 <sup>9</sup> Infectious Diseases and Hospital Epidemiology, University Hospital Basel and University of  
21 Basel, Basel, Switzerland

22 <sup>10</sup> Department of Biosystems Science and Engineering, ETH Zurich, Basel, Switzerland

23 <sup>11</sup> Clinical Virology, University Hospital Basel, Basel, Switzerland

24 <sup>12</sup> Transplantation & Clinical Virology, Department of Biomedicine, University of Basel, Basel,  
25 Switzerland

26

27 \* Corresponding author

28 Email: [adrian.egli@usb.ch](mailto:adrian.egli@usb.ch)

29

30 ¶ These authors contributed equally to this work.

NOTE: This preprint reports new research that has not been certified by peer review and should not be used to guide clinical practice.

31 **Abstract (377 words)**

32 **Background.** The risk of SARS-CoV-2 (SCoV2) infection in schools and student households  
33 is typically assessed using classical epidemiology whereby transmission is based on time of  
34 symptom onset and contact tracing data. Using such methodologies may be imprecise  
35 regarding transmission events of different, simultaneous SCoV2 variants spreading with  
36 different rates and directions in a given population. We analysed with high resolution the  
37 transmission among different communities, social networks, and educational institutions and  
38 the extent of outbreaks using whole genome sequencing (WGS).

39 **Methods and Findings.** We combined WGS and contact tracing spanning two pandemic  
40 waves from October 2020 to May 2021 in the Canton of Basel-City, Switzerland and performed  
41 an in-depth analysis of 235 cases relating to 22 educational institutions. We describe the  
42 caseload in educational institutions and the public health measures taken and delineate the  
43 WGS-supported outbreak surveillance.

44 During the study period, 1,573 of 24,557 (6.4%) children and 410 of 3,726 (11%) staff  
45 members from educational institutions were reported SCoV2 positive. Thereof, WGS data from  
46 83 children, 35 adult staff in 22 educational institutions and their 117 contacts (social network,  
47 families) was available and analysed. 353 contextual sequences from residents of the Canton  
48 of Basel-City sequenced through surveillance were identified to be related to cases in the  
49 educational institutions. In total, we identified 55 clusters and found that coinciding SCoV2-  
50 cases in individual educational institutions were mostly introduced from different sources such  
51 as social networks or the larger community. More transmission chains started in the community  
52 and were brought into the educational institutions than vice versa (31 vs. 13). Adolescents (12-  
53 19 years old) had the highest case prevalence over both waves compared to younger children  
54 or adults, especially for the emerging Alpha variant.

55 **Conclusions.** Introduction of SCoV2 into schools accounts for most events and reflects  
56 transmission closely related to social activity, whereby teenagers and young adults contribute  
57 to significant parallel activity. Combining WGS with contact tracing is pivotal to properly inform  
58 authorities about SCoV2 infection clusters and transmission directions in educational settings  
59 and the effectiveness of enacted public health measures. The gathered data showing more  
60 clusters to seed in the community than vice versa as well as few subsequent in-school  
61 transmissions indicate that the agilely employed health measures for educational institutions  
62 helped to prevent outbreaks among staff and children.

63 The clinical trial accession number is NCT04351503 ([clinicaltrials.gov](https://clinicaltrials.gov)).

64

## 65 Introduction

66 During the first wave of the SARS-CoV-2 (SCoV2) pandemic in 2020, schools and day-care  
67 centres for children were widely closed around the world as part of the extensive measures,  
68 in order to reduce community-spread of the pandemic virus. In the following months, data  
69 suggested that children were not the main drivers of the SCoV2 pandemic; although children  
70 do get infected and transmit the virus, they are less susceptible to infection than adults [1–3]  
71 and also at low risk of a severe clinical course [4]. On the other hand, negative side-effects of  
72 the global lockdowns were found to be particularly pronounced in children and adolescents.  
73 Children from socio-demographic less privileged families regularly suffered from educational  
74 and psychological constraints because of the school closures [5,6].

75 In Switzerland, as in many other countries worldwide, the experiences from the strict lockdown  
76 during the first wave of the pandemic led to a broad social agreement to avoid further school  
77 closures during the ongoing pandemic with all possible efforts [7–9]. However, whether SCoV2  
78 would circulate uncontrolled in schools and childcare facilities was controversially discussed  
79 and difficult to address due to lack of experience with the new pandemic virus. Viewpoints  
80 changed over time with the emergence of new data, more transmissible SCoV2 lineages, and  
81 an increasingly vaccinated adult population.

82 The widespread school closures had hampered the ability to collect data on the transmission  
83 risk in these settings. Studies addressing the question of SCoV2 infection patterns in schools  
84 and childcare facilities most often inferred infection clusters and attack rates based on date of  
85 symptom onset or positive test result, and contact tracing. Those studies largely concluded  
86 low contribution of schools to the overall dynamics of the epidemic, evidenced by few child-to-  
87 child transmissions [10–13] and few child-to-household transmissions [14]. Transmission and  
88 outbreaks that failed to be contained were shown to be due to insufficiently executed mitigation  
89 measures [11]. Importantly, these studies were often conducted over a short time-frame of a  
90 few weeks and primarily relied on counting numbers of SCoV2 infected students and staff  
91 members in schools, assuming that concurrently occurring infections in schools equate to  
92 contagion within the school. The directionality of transmission was deduced via the chronology  
93 of onset of symptoms. However, this may be misleading, as cases may arise from  
94 transmissions outside school premises. The diversification of SCoV2 into lineages [15] can be  
95 discerned by the application of whole genome sequencing (WGS). WGS provides the highest  
96 typing resolution and even allows the separation of single viral genotypes (variants) within and  
97 between samples from infected individuals. Ultimately, this means that the above found child-  
98 to-child and child-to-household transmission events could be even less, if controlled for virus  
99 identity of the infected persons. Further, studies that focussed on outbreak analyses in  
100 educational settings using WGS did not consider the outbreaks in relation to infection events  
101 in the larger community context [16] and hence could not draw conclusions about whether  
102 genotypic variation in the observed outbreak was due to viral evolution or the simultaneous  
103 introduction of similar variants from the community. A profound knowledge about the routes  
104 and directions of transmission events between and within schools and communities would  
105 allow adaptation of measurement concepts to reduce transmission events.

106 In this study, we address the question, whether clusters of SCoV2 infections in children and  
107 adolescents within educational settings over two pandemic waves (October 2020 to May 2021)  
108 were acquired in schools or childcare facilities, or if these could rather be traced back to  
109 transmission events within the family, other social networks, or the broader community. We

110 further investigated the prevalence of detected SCoV2 lineages across different age groups.  
111 Our work used a complementary approach combining detailed contact tracing data with WGS  
112 of viral isolates to reconstruct the routes of transmission at high resolution.

## 113 **Methods**

114 **Study design.** In this observational retrospective epidemiological study, we describe SCoV2  
115 transmission dynamics over a period of eight months from October 2020 to May 2021 within  
116 educational institutions of the Canton of Basel-City, Switzerland. This time frame includes the  
117 second and third SCoV2 local epidemic waves in Switzerland. The first wave is not included  
118 in the study because schools were closed early during the first wave and testing capacities  
119 were limited to symptomatic people, which led to an incalculable underestimation of the total  
120 caseload among children [17,18].

121 All cases in schools and child care facilities were monitored by the Child and Adolescent Health  
122 Services of Basel-City. Here, case clusters with suspected in-school transmission and contacts  
123 were identified for WGS and subjected to a molecular epidemiological outbreak analysis.  
124 Potential clusters of cases in schools were defined as four or more cases among students and  
125 children and staff in the same educational group appearing within ten days between single  
126 cases. We excluded cases that did not fit the definition of potential clusters. For not previously  
127 sequenced samples via our surveillance program, the patients' nasopharyngeal swabs or  
128 saliva samples were collected from the testing laboratories and sent to the University Hospital  
129 of Basel for WGS and lineage typing. Two datasets were used for the subsequent analyses.  
130 Firstly, WGS data of SCoV2 isolates from all inhabitants of the canton of Basel-City were  
131 combined with WGS and contact tracing data from case clusters to infer routes of transmission  
132 in educational institutions for the respective study period. Secondly, WGS data from all  
133 inhabitants of the canton of Basel-City with available age data were used to infer SCoV2  
134 lineage-specific prevalence per age group, as well as the odds of certain SCoV2 lineages  
135 affecting younger age groups more than adults.

136 **Ethical statement.** The study was approved by the local ethical committee (EKNZ number  
137 2020-00769). All data was anonymized for the analysis of the transmission events.

138 **Description of the school landscape in the Canton of Basel-City.** In the Canton of Basel-  
139 City, children start compulsory education at the age of four years with two years of  
140 kindergarten. This is followed by six years of primary school (children aged 6 to 12 years) and  
141 three years of secondary school level I (children aged 12 to 15 years). This compulsory  
142 education is followed by two to four years of secondary school level II (children aged 15 years  
143 and older), which ranges from vocational education to college education and prepares for  
144 tertiary education. In 2021, at the Canton of Basel-City primary schools and kindergarten count  
145 12,814 students and 1,906 teachers; secondary schools level I count 4,343 students and 650  
146 teachers; secondary schools level II count 7,400 students and 1,170 teachers (data provided  
147 by the Department of Education of Basel-City). From the age of 15 weeks, children can be  
148 supervised in childcare facilities. Some of them foster open concepts with open age structures  
149 (children aged from 3 months to 14 years), which allow for mixing across age groups. Childcare  
150 facilities are often attended by students from different primary schools and kindergartens.

151

152 **General case management.** The diagnostic laboratories notify each SCoV2 negative or  
153 positive test result via the national, mandatory reporting system to the Department of Health  
154 Basel-City as the official place of residence. The Department of Health Basel-City established  
155 a contact tracing team at the beginning of the pandemic. The management of SCoV2 positive  
156 cases was adjusted over time according to case prevalence and circulation of new Variants of  
157 Concern (VOCs), such as the Alpha variant (B.1.1.7), Gamma (P.1), and Beta (B.1.351) at the  
158 time. Throughout the pandemic, all individuals tested positive for SCoV2 (index patient (IP))  
159 were contacted by phone and were isolated for ten days. Isolation started from the day after  
160 the onset of first symptoms or the date of sampling in asymptomatic patients. All individuals  
161 tested positive by an antigen test were advised to confirm infection with a SCoV2 specific  
162 nucleic acid amplification test (NAT) assay. All close contact persons (CCP) were also sent  
163 into quarantine for ten days - beginning from the day of the last close contact to the IP. Close  
164 contact outside of school and childcare facilities was defined as contact with less than 1.5  
165 metres distance for more than 15 minutes without sufficient protective measures (e.g. wearing  
166 of masks). CCP were advised to take a NAT assay during the ten-day quarantine. During the  
167 isolation or quarantine, personal and clinical information was registered in the cantonal COVID  
168 Care App-database. The health condition of all IPs and CCPs was monitored through a  
169 smartphone app where questionnaires were filled out regarding the current severity or absence  
170 of symptoms. Individuals without the app were followed-up by phone. All IPs and CCPs were  
171 contacted at least twice during their isolation or quarantine. From 22 January 2021 to 5 March  
172 2021, during the emergence of the Alpha variant, the Department of Health Basel-City  
173 quarantined all individuals living in the same household as CCPs. Further, all second-degree  
174 contact persons (close contact persons of CCPs) were advised to take a SCoV2 specific NAT  
175 assay between the 5th and 10th day after the last close contact. Exemptions for CCP from the  
176 obligation to test and quarantine were granted to fully vaccinated individuals and individuals  
177 with a SCoV2 infection up to six months prior to the close contact (**Table S1**).

178 Within the Department of Health Basel-City, the team of “Child and Youth Health Service”  
179 recorded and managed all SCoV2 cases occurring in schools and childcare facilities, including  
180 infections of children, youth, and educational staff. The Child and Youth Health Service  
181 decided on additional measures in these facilities such as quarantines of entire school classes.  
182 During the study period, several parameters regarding prevention, detection, and  
183 management of SCoV2 cases were repeatedly adjusted according to the epidemiological  
184 situation. These included testing recommendations, management of detected cases (e.g.,  
185 extent of isolation and contact quarantine), and protection concepts in schools and in public.

186 **Molecular surveillance via whole-genome sequencing.** All laboratory-confirmed SCoV2  
187 positive nasopharyngeal swabs or saliva samples tested at the University Hospital Basel  
188 (UHB) [17,18], and samples from external providers requested by the Department of Health  
189 Basel-City were subjected to WGS as previously described [19]. Briefly, we used the  
190 NextSeq500 platform (Illumina) and the ARTIC 3.0 protocol and sequences were quality  
191 controlled using our in-house developed pipeline COVGAP. We identified viral lineages based  
192 on PANGO nomenclature [15]. During the study period the UHB attempted to sequence 4,960  
193 samples, of which 3,433 were of sufficient quality for further investigations. WGS data were  
194 shared via the Swiss Pathogen Surveillance Platform [20] (SPSP, [www.spsp.ch](http://www.spsp.ch)) and  
195 subsequently deposited at GISAID (<https://www.gisaid.org>) and the European Nucleotide  
196 Archive (ENA, <https://www.ebi.ac.uk/ena/browser/home>) at EMBL-EBI. Regular data exports  
197 were generated from SPSP to the Swiss Federal Office of Public Health. Isolates that were

198 not specifically sequenced for this analysis were used as community or contextual sequences.  
199 We could, in most instances, access meta information such as host sex, age, place of  
200 residence and, travel history for the whole-genome sequenced samples originating from UHB,  
201 whereas semi-public and public data retrieved from external sources such as GISAID or ENA  
202 lack this information. Filtering data from UHB and additional samples by other providers from  
203 ENA for those originating from the Canton of Basel-City residents only between 1 October  
204 2020 to 31 May 2021 yielded 4,674 sequences that were subjected to analyses of transmission  
205 direction (**Table S2**; 3,433 from UHB, 1,240 from ETHZ, 1 from HUG). A subset of 1,693  
206 sequences contained information on age and were subjected to the analysis of lineage-specific  
207 infections in children and adolescents (**Table S2**; 1,589 from UHB, 4 from ETHZ).

208 **Assessment of infection risk of children for specific lineages from cases of residents**  
209 **of the Canton of Basel-City.** We calculated census-normalised ratios of sequenced and  
210 reported cases in children in order to infer whether children and youth in different education  
211 institutions were more at risk to be infected with certain viral lineages than adults. The ratios  
212 were then scaled to 100,000 inhabitants. With the available metadata for this particular  
213 analysis, we cannot know which educational institution the infected person visited, so we  
214 inferred the educational institution using age as a proxy. We equated zero- to three-year-olds  
215 to “childcare”, four- to five-year-olds to “kindergarten” (i.e., mandatory pre-school); six- to  
216 eleven-year-olds to “primary school”, 12- to 15-year-olds to “secondary school Level I”, and  
217 16- to 19-year-olds to “secondary school Level II. People aged 20 or older were assigned as  
218 “adults”. Case numbers can be found in **Table 2**.

219 This analysis was done for three significant time frames which differed by major health  
220 measure in the schools as outlined in **Figure 1**. The first time frame from 1 October 2020 to  
221 31 December 2020, or second pandemic wave before the occurrence of VOCs; the second  
222 time frame from 1 January 2021 to 28 February 2021, or second pandemic wave with the  
223 Alpha variant emerging; and the third time frame from 1 March 2021 to 31 May 2021, or the  
224 third pandemic wave with the Alpha variant dominating.

225 To quantify the risk of children in different institutions according to their age being infected with  
226 a certain lineage, we applying logistic regression using age groups as co-variate and extracted  
227 odds ratios and p-values for the exponential model coefficients. Confidence intervals are  
228 calculated as exponential 2.5% and 97.5% confidence intervals from the fitted model (point  
229 estimate of the coefficient +/- 97.5% symmetric interval for a standard normal distribution x  
230 standard error of the coefficient).

231 **Detection of transmission chains in suspected outbreak events.** Within the context of  
232 targeted resolution of suspected outbreaks in schools or childcare facilities, we analysed 235  
233 high-quality SCoV2 genomes from 83 children and students (5.3% of 1,573 totally infected),  
234 22 teachers and 13 educational caregivers (8.5% of totally infected staff), and 117 household  
235 contacts. These were from four *Kindertagesstätten* (childcare facilities), two *Tagesstrukturen*  
236 (childcare facilities), one *Kindergarten* (i.e., pre-school), 13 primary schools, and two  
237 secondary schools level I. The percentage of included children and students is low as most  
238 cases did not fit our inclusion criteria (at least 5 clustered cases within 10 days) and due to a  
239 lower success rate in sequencing due to potential pre-analytical issues with samples from  
240 these cohorts. In contrast to the above-mentioned analysis, we know from contact-tracing,  
241 which educational institutions were attended by each IP and which persons were CCPs. We  
242 discerned the source of infection between (i) community-acquired (publicly-available

243 contextual data on ENA (**Table S2**) from genomic surveillance from residents of the Canton of  
244 Basel-City), (ii) social-network-acquired from known contacts, or (iii) school-acquired.  
245 Transmission chains were defined as genomes that are connected by hierarchical clustering  
246 to a seed consisting of a 0 single nucleotide polymorphism (SNP) distance cluster. In detail, a  
247 three-step method was used to identify transmission chains. Firstly, sequences at 0 SNP  
248 distance (including missing regions) were grouped to obtain strict, mutually-exclusive, clusters,  
249 without applying a time window for cluster delimitation, as we were interested in the  
250 progression of transmission chains. At this point, if a SNP difference occurred in a missing  
251 region of an otherwise identical sequence, this was counted as a SNP difference of 1 and  
252 hence, the sequence with the missing region was placed in a separate cluster. To overcome  
253 this limitation and also to account for the fact that the virus can mutate within a transmission  
254 chain the initial 0 SNP clusters were expanded by adding sequences at 1 SNP distance from  
255 each member of the cluster in a second step. Finally, to avoid having too many clusters that  
256 contain several overlapping sequences, the expanded clusters were merged using hierarchical  
257 clustering based on the sequences belonging to each expanded cluster. The resulting merged  
258 superclusters allowed the identification of transmission chains based on nucleotide level  
259 mutations from the whole genome sequence. The code used for transmission chains is freely  
260 available (<https://gitlab.sib.swiss/SPSP/sarscov2/cluster-detection>).

261 **Tools used for data wrangling, statistical analysis, and visualisation of results.** Data  
262 processing was done either in R version 4.0.3 [21] or Python v3.8.9 [22]. Odds ratios were  
263 calculated using questionr v0.7.4 [23]. The following packages were used for data wrangling  
264 and visualisation: tidyr v1.1.3 [24], ggplot2 v3.3.3 [25], pivottabler v1.5.2 [26], tibble v3.1.0 [27],  
265 hrbrthemes v0.8.0 [28], ggpubr v0.4.0 [29], pandas v1.2.4 [30], and plotly v4.14.3 [31].

## 266 Results

267 **Overall case burden in the Canton of Basel-City between October 2020 and May 2021.**  
268 Between 1 October 2020 and 31 May 2021, a total of 11,476 individuals (IP) with residency in  
269 the Canton of Basel-City tested positive for SARS-CoV-2, of which 693 had to be hospitalised  
270 and 150 died of COVID-19. The median age at diagnosis was 39 years (interquartile range  
271 [IQR] 25-55). Among all confirmed cases, 19% were aged  $\leq 20$  years, 68% were aged 20 - 65  
272 years, and 13% were aged  $\geq 65$  years. Around 52% were female, 48% were male, 0.01% had  
273 no sex indicated. The 11,476 IPs in the observed time frame generated a total of 18,055 CCPs.  
274 The median age of CCPs was 22 years (IQR 9-44), of which 48% were aged  $\leq 20$  years, 42%  
275 were aged 20-65 years, and 10% were aged  $\geq 65$  years. 50.3% of CCP were female, 49.6%  
276 were male, 0.1% had no sex indicated.

277 **Prevention and protection concepts in schools.** **Figure 1** provides a detailed description  
278 of the adjustments of prevention and protection concepts during the study period. By the  
279 beginning of the study period in fall 2020, SCoV2 testing was well established, with sufficient  
280 testing capacities and easy access in testing centres and medical facilities throughout the city  
281 (**Figure 1A**). Initially, low-threshold testing was recommended to all people aged 12 years and  
282 older showing mild symptoms of respiratory disease. Testing of children younger than 12 years  
283 was recommended only in case of fever and reduced general condition, persistent fever or  
284 cough for more than three days, or mild symptoms after close contact with a confirmed SCoV2  
285 infected patient. In schools and childcare facilities, general protection measurements included  
286 intensive hand, object, and surface hygiene and frequent ventilation of (class) rooms

287 **(Figure 1B)**. Staff in all educational facilities and students attending schools beyond the  
288 compulsory school system were required to keep 1.5 m distance to each other, as well as to  
289 younger students and children. Mandatory use of face masks was introduced for staff and  
290 students (aged 12 years and older) in secondary schools from the beginning of the second  
291 wave in November 2020.

292 From October to December 2020, group quarantines of entire classes or educational groups  
293 were only imposed if two or more SCoV2 positive cases appeared within ten days in the same  
294 group and a connection between the cases could not be excluded. When a single case  
295 appeared in a class or educational group, all involved families and staff were informed and  
296 testing was recommended in case of symptoms.

297 In January 2021, when the new Alpha variant of concern reached the Canton of Basel-City,  
298 contact tracing policies were intensified to slow down its spread. The mandatory use of face  
299 masks was extended to the staff of primary schools. As evidence pointed towards increased  
300 infections in children caused by the Alpha variant, face masks also became mandatory for  
301 students of 5th and 6th grade in primary schools (children of 10 years and older). Group  
302 quarantines were now directed at single cases of infections with verified Alpha variant in  
303 schools and childcare facilities in all groups of children or students which did not wear  
304 facemasks. The Alpha variant was detected through variant-specific NAT established as of  
305 mid-January 2021 [32]. In settings with mandatory use of face masks, test recommendations  
306 were given to all students and staff of the same educational group. By March 2021, the Alpha  
307 variant had become dominant in Switzerland and contact tracing in schools no longer  
308 distinguished between different viral lineages, but all cases were managed with the regime  
309 described above. In May 2021, the epidemiological situation shifted again with decreasing  
310 case numbers in Switzerland. By then, people at risk largely had access to vaccination [33]. In  
311 schools and childcare facilities, the policies in the Canton of Basel-City were switched back to  
312 a less rigid regime. Group quarantines were only directed with two consecutive cases in the  
313 same educational group, regardless of the mandatory use of face masks in the group.  
314 However, test recommendations were still given with a low threshold to all people of the same  
315 educational group in every single case in a school and childcare facility.



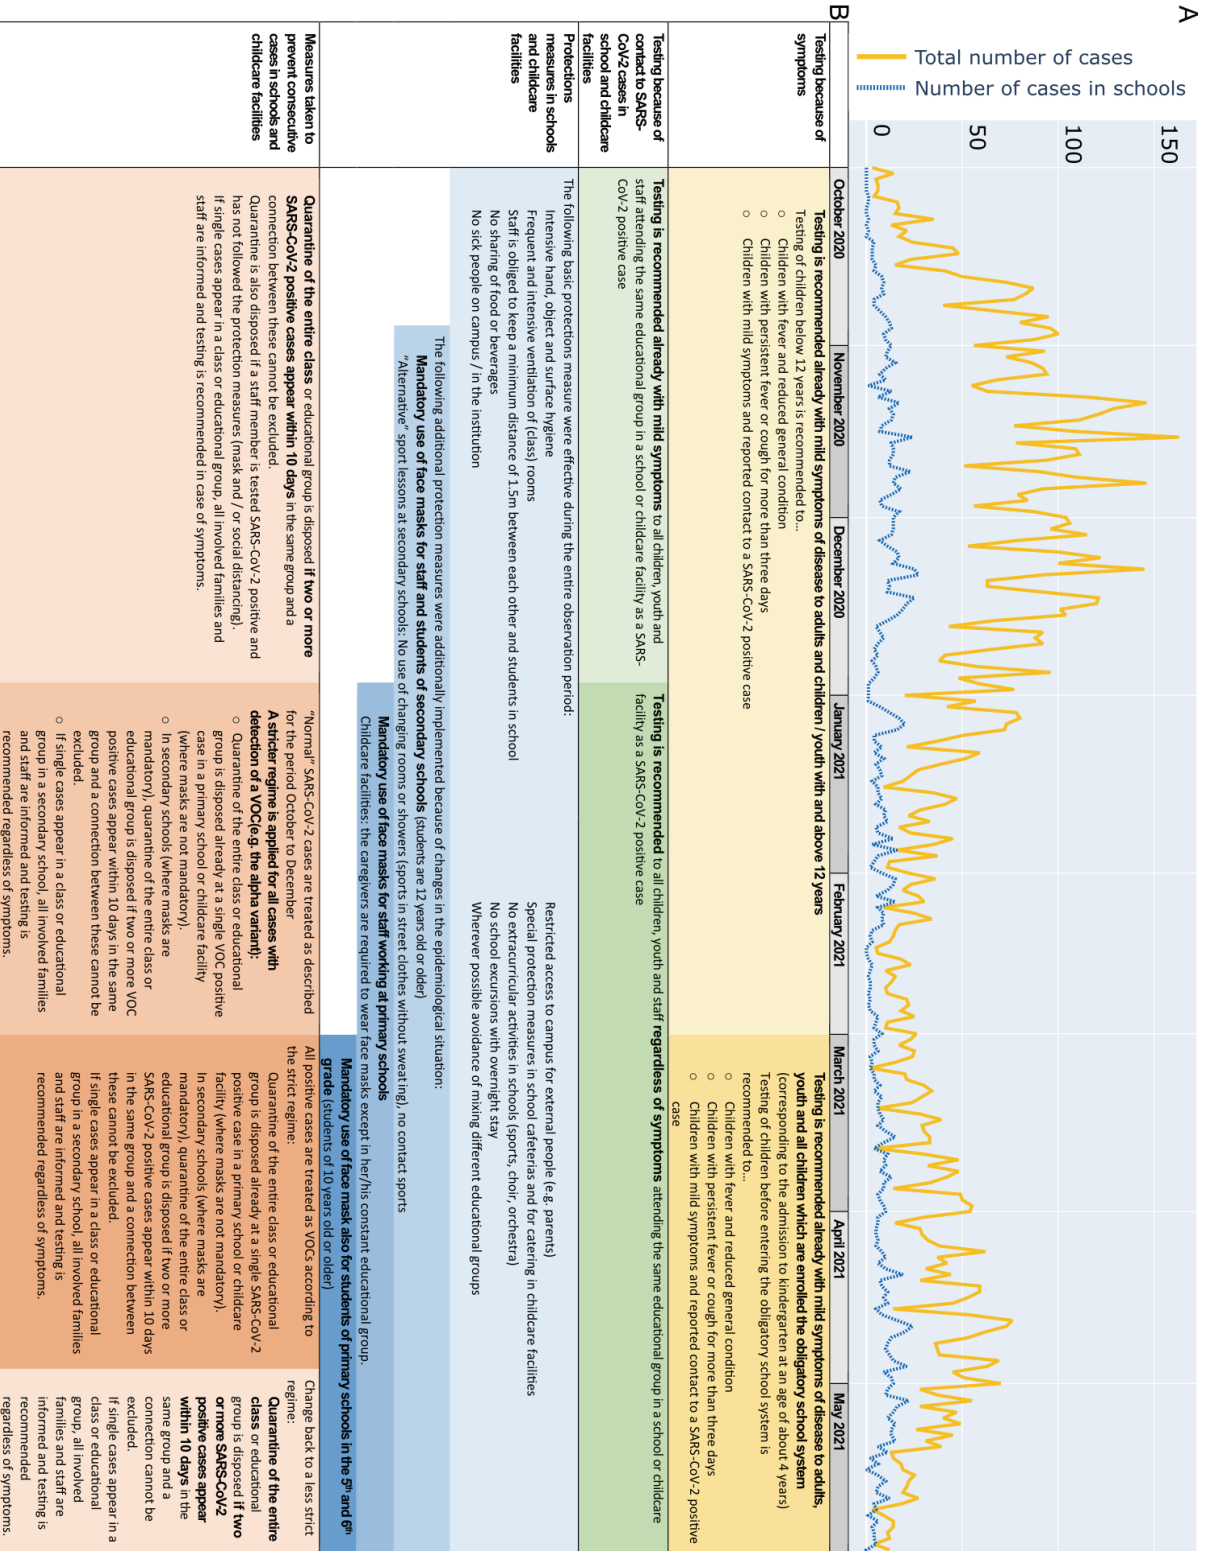

316

317 **Figure 1.** Case detection, prevention and protection concepts in schools in the Canton of Basel-City  
 318 from 1 October 2020 to 31 May 2021. **(A)** Comparison of SCoV2 cases detected in the general  
 319 population and in schools (including students and teachers) of the Canton of Basel-City. **(B)** Overview  
 320 of testing policy, case management, and protection measures in schools and childcare facilities.

321

322 **Cases in schools and childcare facilities by cantonal contact tracing.** During the study  
 323 period, a total of 1,983 SCoV2 positive cases among children and staff were recorded in  
 324 schools and childcare facilities. The total number of SCoV2 positive cases separated by  
 325 education level is shown in **Table 1**. In childcare facilities for ages between zero and six years,  
 326 we saw a predominance of positive cases among staff (61.2%), whereas only 38.8% of  
 327 reported cases were in children. In higher educational levels with older children, we observed  
 328 a higher percentage of cases among children and adolescents compared to staff members  
 329 (**Table 1**). In the primary level (kindergarten and primary school), 4.9% (623/12,814) of  
 330 students and 12.4% (236/1,906) of staff tested positive, in secondary school level I 6.9%  
 331 (298/4,343) of students and 6.2% (40/650) of staff tested positive, in secondary school level II  
 332 7.9% (586/7,400) of students and 2.6% (30/1,170) of staff tested positive. Hence from primary  
 333 level to secondary level II the proportion of positive tested individuals increased for students  
 334 and decreased for staff.

335 The temporal change of relative proportions of teacher/student infections are shown in  
 336 **Figure 2**. Interestingly, the distribution patterns changed around January 2021 with a higher  
 337 case load predominantly in younger age groups covering childcare facilities, kindergarten and  
 338 primary schools. In contrast, the distribution of cases among students versus staff in secondary  
 339 school was consistent and relatively low during the entire study period.

340

341 **Table 1.** Number of SCoV2 positive cases during the study period from October 2020 to May 2021 in  
 342 schools or childcare facilities, without contact persons, categorised by education level and resolved by  
 343 children or students and staff registered by the Department of Health Basel-City. The percentage of  
 344 children and students or staff in relation to the total number of cases in the educational level is given in  
 345 brackets. Age boundaries for school and childcare facilities overlap as these were determined based  
 346 on the actual knowledge of which facility was visited by each infected case.

| School or childcare facility | Average age boundaries children / students | SARS-CoV-2 cases among children / students | SARS-CoV-2 cases among staff | Total case numbers |
|------------------------------|--------------------------------------------|--------------------------------------------|------------------------------|--------------------|
| childcare facilities         | 0 to 6 years                               | 66 (38.8%)                                 | 104 (61.2%)                  | 170                |
| kindergarten                 | 4 to 6 years                               | 127 (70.9%)                                | 52 (29.1%)                   | 179                |
| primary school               | 6 to 12 years                              | 496 (72.9%)                                | 184 (27.1%)                  | 680                |
| secondary school level I     | 12 to 15 years                             | 298 (88.2%)                                | 40 (11.8%)                   | 338                |
| secondary school level II    | 15 years and older                         | 586 (95.1%)                                | 30 (4.9%)                    | 616                |
| total                        |                                            | 1,573                                      | 410                          | 1,983              |

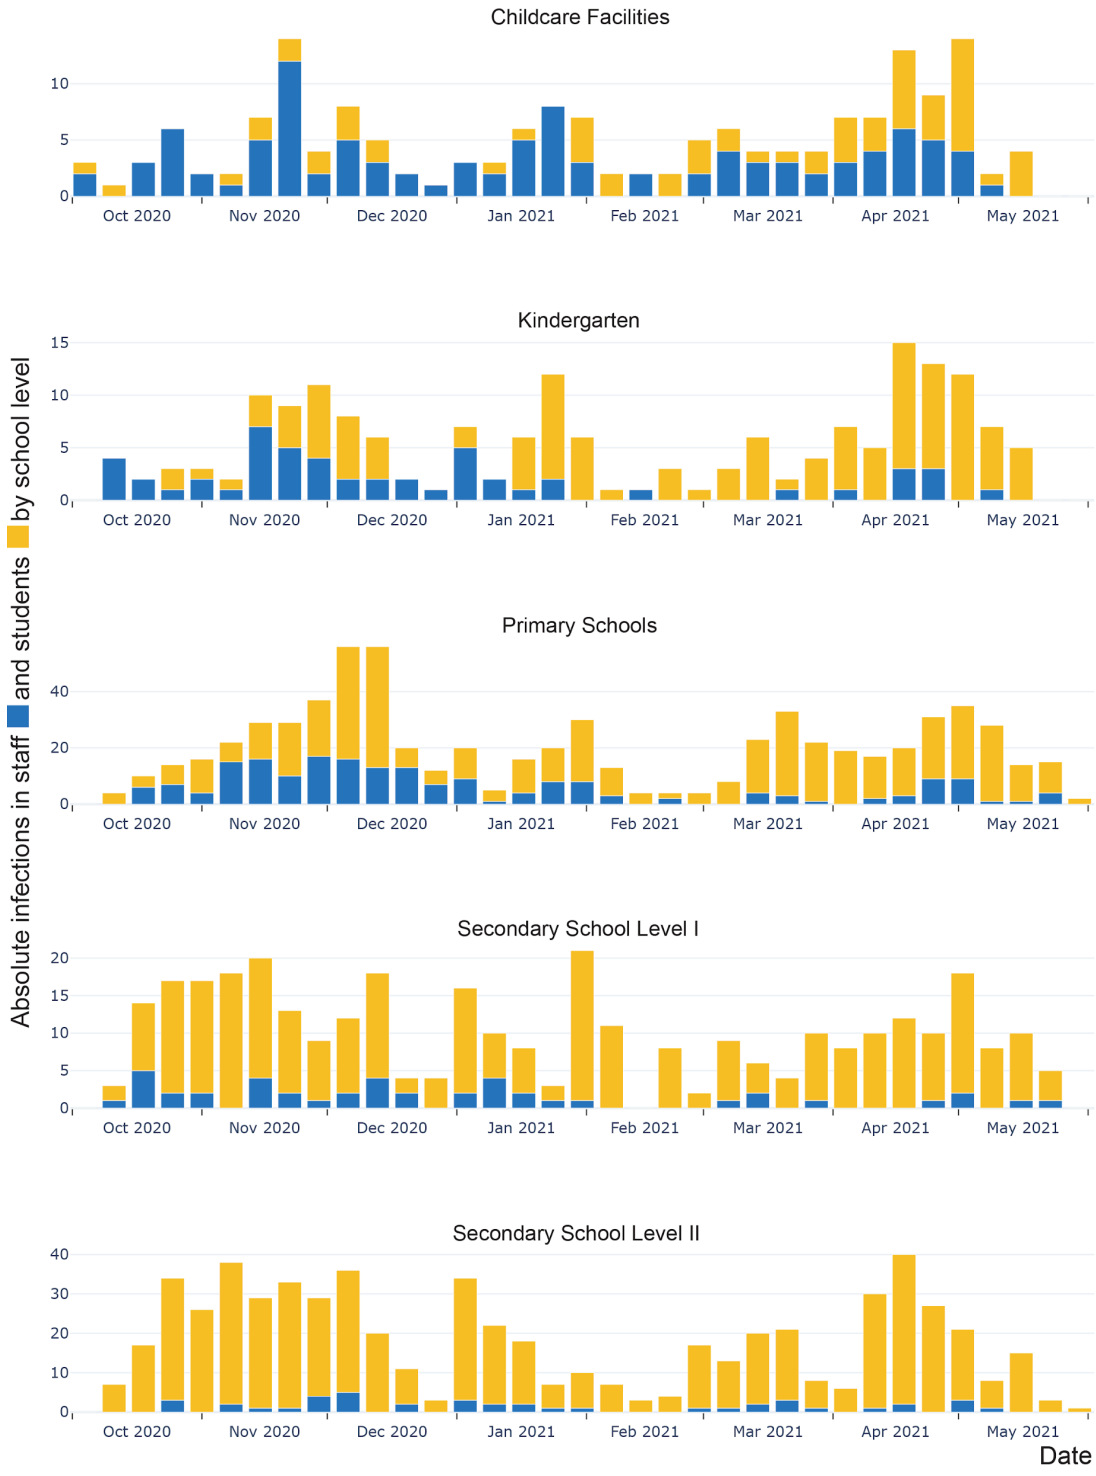

347

348 **Figure 2.** Temporal resolution in weeks of absolute positive SCoV2 cases in teachers and caregivers  
 349 (staff; in blue) and students (yellow) resolved by school level during the study period (1 October 2020  
 350 to 31 May 2021).

351

352

353

354 **Contact tracing-informed molecular cluster identification in schools and childcare**  
355 **facilities.** Based on the contact tracing information available to the Department of Health  
356 Basel-City, we sought data and samples from cases linked to 22 educational facilities, resulting  
357 in sequencing data for 83 infected students (primary to secondary level) and children (below  
358 primary level but in childcare), 35 staff, 117 household contacts, to compare to surveillance  
359 data for residents of the Canton of Basel-City. Based on this data, we attempted to define  
360 clusters of infections and to discern the source and direction of transmissions.

361 The cluster analysis identified another 353 contextual sequences from residents of the Canton  
362 of Basel-City that were putatively connected to the school cases. Across this dataset, we  
363 identified 55 clusters with a total of 566 cases and a size of two to 63 cases per cluster  
364 (**Figure 3**). The largest identified cluster (no. 37 in **Figure 3**) belongs to the Alpha variant and  
365 contains samples from 8 January 2021 to 10 March 2021 with 63 cases. This particular cluster  
366 consisted of seven students and two teachers, from two schools in the same city quarter, as  
367 well as seven contacts identified via contact tracing, and 47 additionally identified contextual  
368 sequences from the community. The earliest cases from January 2021 were contextual  
369 samples and only later, in early February 2021, cases were traced in the school environment.  
370 When focusing on individual schools (colour of symbols), we observed that temporally  
371 clustered cases per school frequently belong to different transmission chains, e.g., schools A,  
372 C, O, M and others (**Figure 3**). In addition, among the identified clusters, some contain cases  
373 from different educational institutions, e.g., clusters no. 0 and no. 2 (**Figure 3**), which were  
374 likely caused by cross-institutional visits such as primary school in the morning and a childcare  
375 facility in the afternoon.

376 In summary, taking the temporal succession of cases by sampling date in each cluster into  
377 account, the following plausible transmission scenarios unfold: we putatively identified 19  
378 community-to-school transmissions (chains that start with “x”) without within-school  
379 transmissions and 12 with subsequent in-school transmissions (**Figure 3**); ten school-to-  
380 community transmissions without within-school transmission and three with within-school  
381 transmissions (5 of which showed the Alpha variant). In transmission clusters with in-school  
382 transmissions, we putatively identified seven with teacher-to-student, three with teacher-to-  
383 teacher, seven with student-to-student, and five with student-to-teacher transmissions  
384 (**Figure 3**).

385 Most outbreaks, in terms of numbers of involved cases, occurred during the second wave with  
386 the introduction of VOCs: here the Alpha variant had the largest impact. During the equally  
387 long two time periods before and after that (second wave pre-VOC and third wave), 17 and 28  
388 clusters or single cases were counted, respectively (**Figure 3**).

389 We also identified 22 single cases (11 students, two teachers, one caregiver, eight contacts)  
390 from 28 November 2020 to 5 May 2021 that did not cluster with any other sequence registered  
391 in the Canton of Basel-City (**Figure 3**). By the study-inclusion criteria only clustered cases  
392 were subjected to contact tracing-informed molecular cluster identification. Hence the  
393 identified single cases were either connected to cases that failed sequencing or were true  
394 single cases. The lack of other related sequences in the community dataset indicates  
395 successful mitigation of broader transmission.

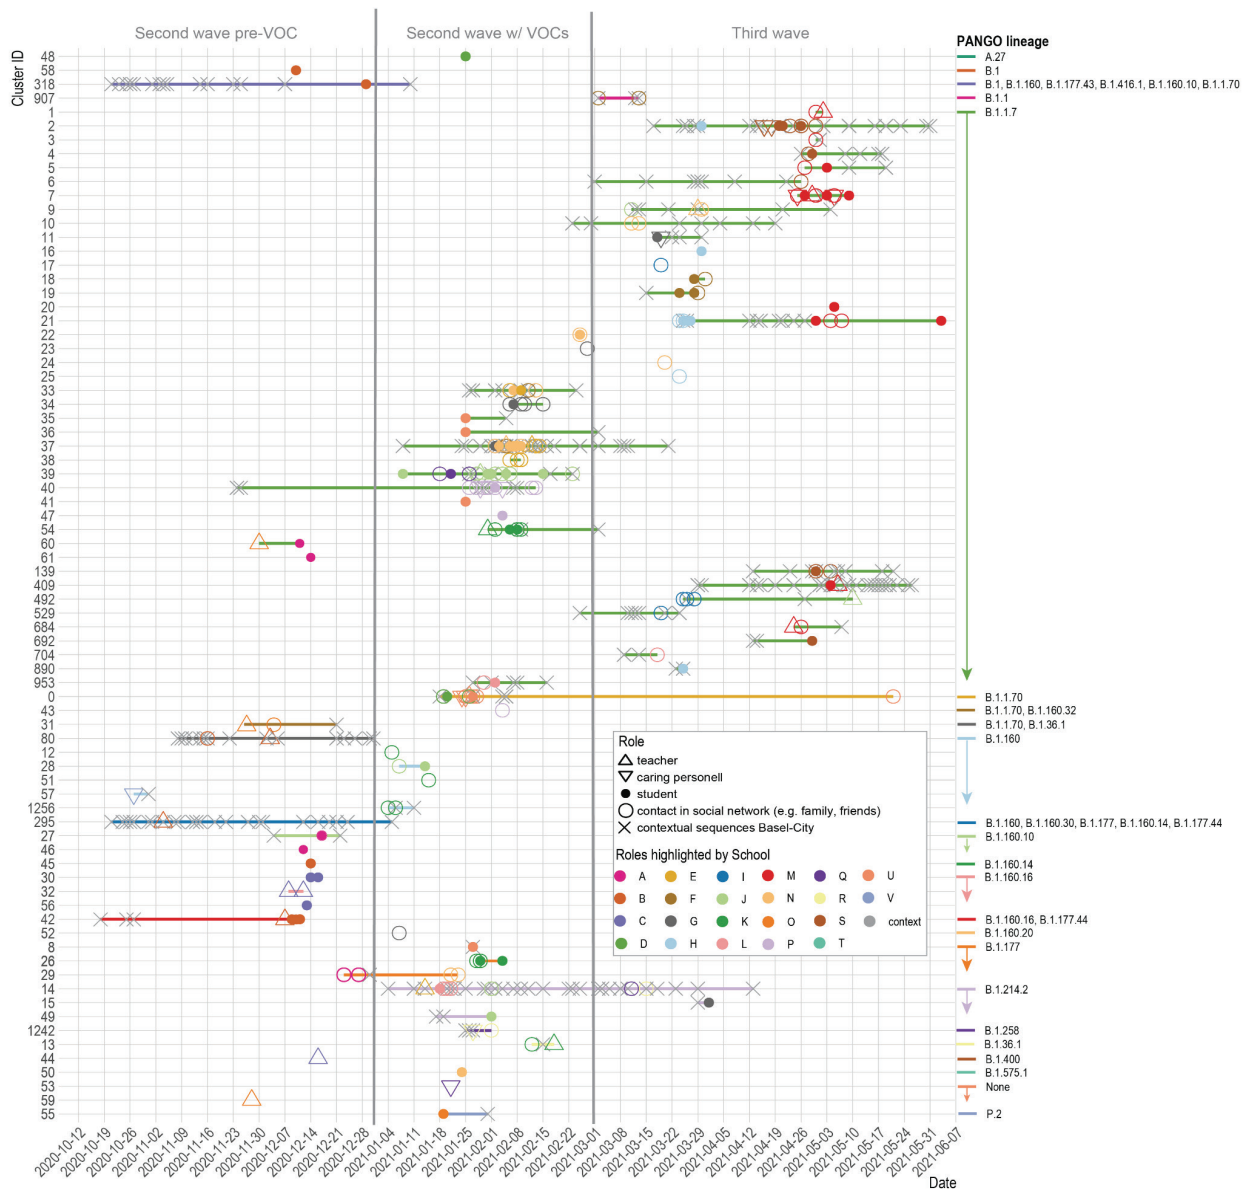

396

397 **Fig. 3.** Temporal resolution of SCoV2 transmission chains in 55 identified clusters and 22 single cases  
 398 including 83 students, 22 teachers, 13 caregivers and 117 by contact tracing identified contacts from  
 399 social networks (family, friends), plus another 353 sequences from residents of the Canton of Basel-  
 400 City identified via the WGS-aided clustering approach. Each horizontal line represents clustered  
 401 (genetically related) sequences coloured by PANGO lineage and vertically sorted by PANGO lineage  
 402 in alphabetical order; symbols represent origin per detected case (school setting or contextual case  
 403 from the Canton of Basel-City); colour of symbols represent origin per school.

404 **Temporal dynamics of lineage-specific infection risk of different age groups.** Based on  
 405 the SCoV2 PANGO lineage identity of detected cases in education institutions and infected  
 406 residents of the Canton of Basel-City, we explored whether children of different age groups as  
 407 compared to adults were of greater risk to be infected with certain SCoV2 lineages. In  
 408 particular, we identified the most prevalent lineages and VOCs compared to other SCoV2  
 409 lineages circulating during the same time period. Generally, we observed an increasing  
 410 number of infections with increasing age (**Table 2**), which could reflect a sampling bias. For  
 411 this reason, we normalized the SCoV2 lineage per infection in each age category. This shows  
 412 that SCoV2 lineage distribution in younger age groups is mirrored by the dynamic changes

413 observed in adults (**Figure 4A-D, Figure S1**). Age- and lineage-specific prevalence  
 414 demonstrates that during the second wave, before the occurrence of the Alpha variant,  
 415 adjusted for their proportion of the population of the Canton of Basel-City, youths aged 16 to  
 416 19 years were more infected than adults (**Figure 4B**). During the third wave, driven by the  
 417 Alpha variant, children aged 12 to 19 years were most affected (**Figure 4D**). Over both  
 418 epidemic waves the Alpha variant had the highest prevalence among children of school age  
 419 (aged 6 to 19 years) when compared to other age groups (**Figure 4A**). In terms of the odds  
 420 to be infected with a certain lineage compared to adults, during the entire study period, children  
 421 in the primary level and younger had 3 to 4 times the odds ( $p < 0.03$ ) of an adult to be infected  
 422 with the Alpha variant and only 0.3 times the odds ( $p = 0.027$ ) to be infected with B.1.177  
 423 (**Table 3, Table S3**). During the first study period (second wave pre-VOCs, October to  
 424 December 2020) children aged 0 to 3 years old had 9 times ( $p=0.02$ ) the odds of an adult  
 425 getting B.1.258 (**Table 3, Table S4**). Yet during this time the diversity of SCoV2 lineages ( $N =$   
 426 57) and hence viral competition for hosts was large (**Table S8**). During the second study period  
 427 (second wave with VOCs, January to February 2021) 31 SCoV2 lineages were detected in the  
 428 Canton of Basel-City (**Table S9**). During that time children aged 6 to 11 years had 4 times  
 429 ( $p=0.009$ ) the odds of an adult to be infected with the Alpha variant (**Table 3, Table S5**). During  
 430 the third study period (third wave, March to May 2021) 19 SCoV2 lineages were still circulating  
 431 (**Table S10**) of which the Alpha variant was dominating the infection events. Accordingly, no  
 432 differences in odds to be infected with a specific SCoV2 variant among age groups were found  
 433 (**Table 3, Table S6**).

434 **Table 2.** Number of available SCoV2 genomes from October 2020 to May 2021 and per subdivided  
 435 time frame as per major health care measures, as well as census data for each age category from the  
 436 Canton of Basel-City as of 31 December 2020 [34]\* in age groups and their corresponding school level.  
 437 School level was deduced solely based on age, as no information on school level per case was  
 438 available.

| age group<br>(school level)          | no. genomes,<br>All periods:<br>Oct 2020 to<br>May 2021 | no. genomes,<br>First period:<br>Oct 2020 to<br>Dec 2020 | no. genomes,<br>Second period:<br>Jan 2021 to Feb<br>2021 | no. genomes,<br>Third period:<br>Mar 2021 to<br>May 2021 | no. inhabitants<br>per age group<br>as of 31 Dec<br>2020* |
|--------------------------------------|---------------------------------------------------------|----------------------------------------------------------|-----------------------------------------------------------|----------------------------------------------------------|-----------------------------------------------------------|
| 0-3 (childcare)                      | 23                                                      | 5                                                        | 5                                                         | 13                                                       | 7,531                                                     |
| 4-5 (kindergarten)                   | 14                                                      | 0                                                        | 3                                                         | 11                                                       | 3,765                                                     |
| 6-11 (primary<br>school)             | 72                                                      | 18                                                       | 17                                                        | 37                                                       | 10,435                                                    |
| 12-15 (secondary<br>school level I)  | 76                                                      | 29                                                       | 10                                                        | 37                                                       | 6,239                                                     |
| 16-19 (secondary<br>school level II) | 101                                                     | 44                                                       | 11                                                        | 46                                                       | 6,164                                                     |
| 20 and older<br>(adults)             | 1,406                                                   | 690                                                      | 249                                                       | 467                                                      | 167,837                                                   |

439  
 440  
 441  
 442  
 443

444 **Table 3.** Summary table of odds ratios, with significant results and total case number per PANGO  
 445 lineage larger than 10 only, in defined educational institutions (childcare [zero to three years old],  
 446 kindergarten [four to five years old], primary school [six to eleven years old], secondary school level I  
 447 [twelve to fifteen years old], secondary school level II [sixteen to nineteen years old]) compared to adults  
 448 ( older than 19 years) for prevalent lineages for the entire study period and selected time frames  
 449 according to major health measures. Total case numbers used to calculate odds can be found in  
 450 **Table 2.** All results to be found in **Tables S3-S6.** Number of cases per PANGO lineage in **Tables S7-**  
 451 **S10.** “Secondary I” corresponds to Secondary school Level I, “Secondary II” to Secondary school Level  
 452 II. OR: point estimate for odds ratio, CI: confidence interval, p: p-value, N: sample size.

| comparison per time frame                                                                          | OR    | 2.5% CI | 97.5% CI | p      |
|----------------------------------------------------------------------------------------------------|-------|---------|----------|--------|
| <b>Complete study period<br/>from 1 Oct 2020 to 31 May 2021</b>                                    |       |         |          |        |
| <b>Alpha (total cases N=639); school type infections (per category below) vs. adults (N=486)</b>   |       |         |          |        |
| childcare (N=16)                                                                                   | 4.327 | 1.834   | 11.322   | 0.0013 |
| kindergarten (N=9)                                                                                 | 3.407 | 1.117   | 11.142   | 0.0287 |
| primary (N=44)                                                                                     | 2.975 | 1.840   | 4.887    | 0.0000 |
| secondary I (N=39)                                                                                 | 1.995 | 1.255   | 3.179    | 0.0035 |
| secondary II (N=45)                                                                                | 1.521 | 1.008   | 2.283    | 0.0436 |
| <b>B.1.214.2 (total cases N=38); school type infections (per category below) vs. adults (N=28)</b> |       |         |          |        |
| kindergarten (N=2)                                                                                 | 8.202 | 1.240   | 31.963   | 0.0075 |
| <b>B.1.617.2 (total cases N=13); school type infections (per category below) vs. adults (N=9)</b>  |       |         |          |        |
| primary (N=3)                                                                                      | 6.749 | 1.473   | 23.202   | 0.0049 |
| <b>First study period<br/>from 1 Oct 2020 to 31 Dec 2020</b>                                       |       |         |          |        |
| <b>B.1.258 (total cases N=55 school type infections (per category below) vs. adults (N=47)</b>     |       |         |          |        |
| childcare (N=2)                                                                                    | 9.121 | 1.180   | 56.333   | 0.0169 |
| <b>Second study period<br/>from 1 Jan 2021 to 29 Feb 2021</b>                                      |       |         |          |        |
| <b>Alpha (total cases N=103); school type infections (per category below) vs. adults (N=79)</b>    |       |         |          |        |
| primary (N=11)                                                                                     | 3.945 | 1.448   | 11.808   | 0.0090 |
| <b>Third study period<br/>from 1 Mar 2021 to 31 May 2021</b>                                       |       |         |          |        |
| none significant                                                                                   |       |         |          |        |

453  
454

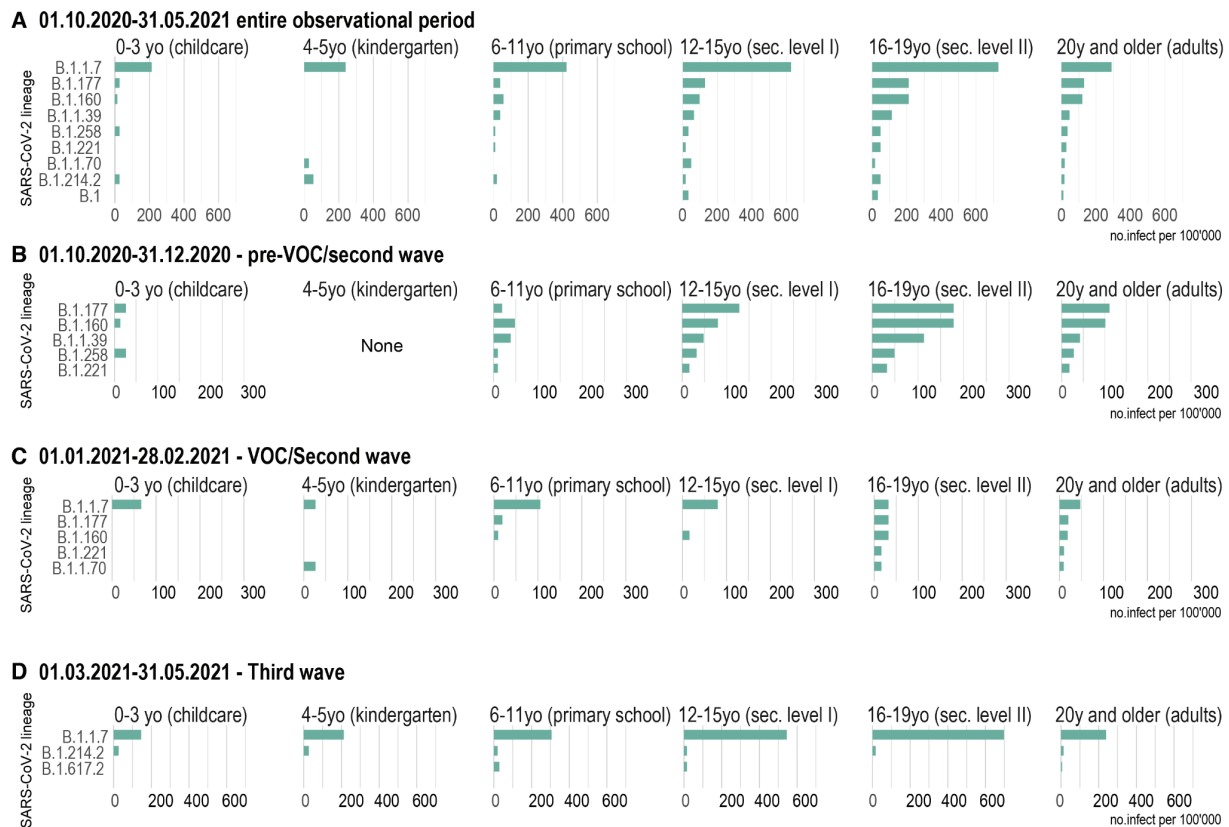

455

456 **Figure 4.** Population normalised SCoV2 lineage-specific prevalence per 100,000 inhabitants per age  
 457 category (corresponding school levels shown in brackets) shown for the entire study period and per  
 458 major time window as defined by major health measures in each period (for reference see **Figure 1**).  
 459 Only the most prevalent lineages are shown here; the complete figures for the entire study period and  
 460 the subperiods can be found in **Figures S1-S4**.

## 461 Discussion

462 This study adds important evidence on the transmission dynamics of SCoV2 in schools and  
 463 childcare facilities during two waves of the current COVID-19 pandemic, combining high-  
 464 resolution WGS and contextual contact tracing data in a unique way.

465 The Canton of Basel-City sequenced 40.6% of its positive cases, which corresponds to a very  
 466 high sequencing frequency per capita compared to other countries  
 467 (<https://www.covid19dataportal.org/statistics>). In terms of total sequences deposited at  
 468 GISAID per capita, Switzerland ranks 7th globally in a current estimation (Dec 2021). Hence,  
 469 the evolution and distribution of viral lineages and variants (to the SNP-level) was extremely  
 470 well monitored during the course of the epidemic, rendering a comprehensive picture of the  
 471 virus transmission in the community as “background data” for the investigation of  
 472 transmissions in schools and childcare facilities. Contact tracing of positive cases in schools  
 473 and childcare facilities was operated centrally at the Child and Youth Health Services for the  
 474 Canton of Basel-City, ensuring that all available information about such cases was collected  
 475 and analysed continuously. This, to our knowledge, unique approach combining contact  
 476 tracing and WGS data beyond the lineage identity from outbreaks in educational settings  
 477 allowed us to analyse and interrelate to WGS data of other cases in the general community.



478 The observational investigation of transmission clusters in school settings showed that more  
479 transmission chains started in the community and were brought into the educational institutions  
480 than vice versa (31 vs. 13). Also, we observed fewer transmission chains resulting in in-school  
481 than outside-school transmissions (15 vs. 29), independent of the source. When in-school  
482 transmission occurred, staff commenced transmission chains to children more often than the  
483 other way around (7 vs. 5). These findings support previous studies relying on contact tracing  
484 data only, which also found a low rate of in-school transmissions, especially in younger  
485 children [10–12,35,36]. Our results add more granularity and the fact that the community  
486 largely seeded infection events within schools, which is important when evaluating protective  
487 measures. Staff-to-staff and student-to-student transmissions were 3 vs. 7, which is  
488 comparable to a study conducted in the UK where only about 10% of assumed transmission  
489 events were between students themselves [13]. This is remarkable taking into account that  
490 more than six times more students than teachers attend school, and given that especially  
491 young children interact closer to each other and are less conscious of hygienic measures. This  
492 observation may be biased by the higher test frequency and therefore higher detection rate in  
493 adults compared to children during the study period. The recommendation to test differed for  
494 children and adults, resulting in a higher threshold to test children especially below the age of  
495 6 years old. However, the discrepancy might have been balanced out to a certain extent since  
496 children were symptomatic more often due to several other viruses spreading in childcare  
497 facilities and schools. Children therefore met test criteria frequently despite the high threshold  
498 imposed. Notably, wearing face masks was mandatory as of 5th grade for children, but not for  
499 children in the lower grades. We expected to observe shifts in the distribution of cases in  
500 childcare facilities and in the primary school level towards a higher proportion of affected  
501 students after January 2021. This shift is concomitant to the establishment of the Alpha variant  
502 in the Canton of Basel-City and the implementation of the mandatory use of face masks among  
503 staff in childcare facilities, kindergarten and primary school, as well as students of 5th and 6th  
504 grade in primary school. We hypothesize that the few transmissions among staff can be  
505 attributed to the implemented health measures, i.e., wearing of masks, distances, hygiene,  
506 and free testing even for mildly symptomatic individuals. Yet although transmission in schools  
507 were low, most lineage-specific SCoV2 prevalences were higher in children than in adults in  
508 both epidemic waves particularly in 12- to 19-year-olds, meaning adolescents had a higher  
509 relative case burden. Our analysis yielded an age-dependent infectiousness for the Alpha  
510 variant, with younger children being more likely to be infected than adults. Contrasting  
511 evidence is found in the current literature, from no differential affection of children and adults  
512 [37] to preliminary not yet peer-reviewed findings that support higher case burden the younger  
513 the children are [38].

514 Importantly, we were able to demonstrate that suspected clusters with temporally co-occurring  
515 cases were often caused by simultaneous introductions and sometimes transmissions of  
516 different SCoV2 variants. Our study is unique in the sense that WGS data allowed us to prove  
517 at highest resolution that many co-occurring cases were not connected. Previous studies on  
518 school outbreaks assumed viral transmission when several cases co-occurred in a classroom  
519 or childcare group within a certain time frame. In fact, we noted that during the second wave  
520 before the occurrence of VOCs, almost all apparent school clusters could be unravelled to  
521 stem from the random simultaneous appearance of different virus variants in the same  
522 classroom. These findings also influenced public health decisions and measures in the Canton  
523 of Basel-City, for instance challenging the assumptions previously leading to group  
524 quarantines.

525 Over the course of the SCoV2 epidemic, public health measures and contact tracing were  
526 adapted agilely, largely driven by the development of case numbers and the shift of the  
527 circulating dominant virus variants. However, apart from the initial lockdown, the Canton of  
528 Basel-City avoided closing schools and childcare facilities and did not implement strict online  
529 distance learning. Our data justify this management, showing that schools and childcare  
530 facilities were not high-risk venues driving virus transmission. The viral activity in educational  
531 institutions mirrored what was happening in local communities. Keeping schools and childcare  
532 facilities open was accompanied by a large number of protection measures, which were  
533 implemented in order to reduce the risk of virus transmissions. It is difficult to determine  
534 whether these measures had a significant influence in the dynamics of virus transmission,  
535 even after our detailed time-resolved analysis. However, we did observe that after the  
536 introduction of the mandatory use of face masks for teachers and caregivers in primary school,  
537 kindergarten and child care facilities and the increasing number of vaccinated adults, the ratio  
538 of affected adults compared to children was clearly reduced. This finding points towards a  
539 protective effect of mask wearing in educational institutions. This is concordant with other  
540 studies, showing that the use of face masks and the COVID-19 vaccine are one of the most  
541 efficient protection measures in the SCoV2 pandemic [39].

542 This study bears important limitations caused by missing data due to unsequenced cases. We  
543 found 22 single cases which had - derived from contact tracing - been related to clusters in  
544 schools or childcare facilities, for which we failed to detect other school or community cases  
545 despite our extensive SCoV2 database for the Canton of Basel-City. Some of these might  
546 indeed be “single cases” within the Canton of Basel-City and might have been imported from  
547 other cantons or countries. However, particularly after the establishment of VOCs, WGS more  
548 often failed because of pre-analytical quality or low viral load in the collected sample. This was  
549 probably due to changes in contact tracing policies, now advising also asymptomatic contact  
550 persons, as well as people with mild symptoms to undergo testing. Another important aspect  
551 is the sampling bias due to changing recommendations. We tried to sequence as many cases  
552 as possible to generate a comprehensive picture.

553 The SCoV2 pandemic is highly dynamic and therefore scientific results are in many ways  
554 short-lived. After completion of this study, the Delta variant (B.1.617.2) became the dominant  
555 virus variant as of July 2021 in the Canton of Basel-City. It caused the fourth epidemic wave  
556 for about three months, whereafter the first Omicron variant (B.1.1.529) cases were reported  
557 in our region in December 2021. During the fourth wave, we registered an increasing number  
558 of apparent infection clusters in schools and childcare facilities. It will be interesting to repeat  
559 the analyses depicted in this study including and comparing the wave caused by the more  
560 infectious Delta variant and the Omicron wave that is to come, especially since NAT pool-  
561 testing was established in the primary level as of June 2021.

## 562 **Conclusions**

563 Analysing SCoV2 case clusters with WGS, this study shows that in the Canton of Basel-City  
564 from October 2020 to May 2021 cases of apparent transmission clusters in schools or  
565 childcare facilities were often not connected, but caused by different SCoV2 variants  
566 introduced from the community. In-school transmissions were infrequent and often involved  
567 adults. Our findings confirm that schools and childcare facilities were not hotspots for SCoV2  
568 transmission during the Alpha wave and mostly reflected contagion in the community. During

569 both waves, teenagers had higher caseloads than younger children or adults, which may be  
570 due to different behaviours. With the establishment of the Alpha variant as of January 2021,  
571 children were more likely to be infected than adults. Our data add additional arguments to the  
572 effectiveness of health measures, such as mandatory face masks and low testing thresholds.

## 573 **Acknowledgements**

574 SARS-CoV-2 genome assemblies were performed at sciCORE (<http://scicore.unibas.ch/>)  
575 scientific computing centre at University of Basel, the support from the sciCORE team for the  
576 analysis is greatly appreciated. We also thank Daniel Walther from the development team of  
577 the Swiss Pathogen Surveillance Platform ([www.spsp.ch](http://www.spsp.ch)), all authors who have shared their  
578 genomic data on ENA, and Gilles Dutilh from Clinical Trial Unit of the Department Clinical  
579 Research, University of Basel.

## 580 **Funding statement**

581 The author(s) received no specific funding for this work.

## 582 **Ethics**

583 The study was conducted according to good laboratory practice and in accordance with the  
584 Declaration of Helsinki and national and institutional standards. The study was assessed and  
585 approved by the local ethical committee (Ethikkommission Nordwest und Zentralschweiz,  
586 [www.eknz.ch](http://www.eknz.ch); ID number: 2020–00769). No signature was required according to the ethical  
587 assessment. All data from study participants (pediatric and adult patients) were reported in an  
588 anonymous fashion. The clinical trial accession number is NCT04351503 ([clinicaltrials.gov](http://clinicaltrials.gov)).

589

## 590 **References**

- 591 1. Viner RM, Mytton OT, Bonell C, Melendez-Torres GJ, Ward J, Hudson L, et al.  
592 Susceptibility to SARS-CoV-2 Infection Among Children and Adolescents Compared  
593 With Adults: A Systematic Review and Meta-analysis. *JAMA pediatrics*. 2021;175:  
594 143–156. doi:10.1001/jamapediatrics.2020.4573
- 595 2. Li X, Xu W, Dozier M, He Y, Kirolos A, Theodoratou E. The role of children in  
596 transmission of SARS-CoV-2: A rapid review. *Journal of Global Health*. 2020;10:  
597 011101. doi:10.7189/JOGH.10.011101
- 598 3. Williams PCM, Howard-Jones AR, Hsu P, Palasanthiran P, Gray PE, McMullan BJ, et  
599 al. SARS-CoV-2 in children: spectrum of disease, transmission and  
600 immunopathological underpinnings. *Pathology*. 2020;52: 801–808.  
601 doi:10.1016/j.pathol.2020.08.001
- 602 4. Zimmermann P, Curtis N. Why is COVID-19 less severe in children? A review of the  
603 proposed mechanisms underlying the age-related difference in severity of SARS-CoV-  
604 2 infections. *Archives of Disease in Childhood*. 2021;106: 429–439.  
605 doi:10.1136/archdischild-2020-320338
- 606 5. Levinson M, Cevik M, Lipsitch M. Reopening Primary Schools during the Pandemic.  
607 Malina D, editor. *New England Journal of Medicine*. 2020;383: 981–985.  
608 doi:10.1056/NEJMms2024920
- 609 6. Pfefferbaum B. Challenges for Child Mental Health Raised by School Closure and  
610 Home Confinement During the COVID-19 Pandemic. *Current Psychiatry Reports*.  
611 2021;23: 65. doi:10.1007/s11920-021-01279-z
- 612 7. Cohen R, Delacourt C, Gras-Le Guen C, Launay E, French Pediatric Society. COVID-  
613 19 and schools. Guidelines of the French Pediatric Society. *Archives de Pédiatrie:*  
614 *organe officiel de la Societe francaise de pediatrie*. 2020;27: 388–392.  
615 doi:10.1016/j.arcped.2020.09.001
- 616 8. Lewis SJ, Munro APS, Smith GD, Pollock AM. Closing schools is not evidence based  
617 and harms children. *The BMJ*. 2021;372: n521. doi:10.1136/bmj.n521
- 618 9. American Academy of Pediatrics. COVID-19 Guidance for Safe Schools and  
619 Promotion of In-Person Learning. 2021. Available:  
620 [https://www.aap.org/en/pages/2019-novel-coronavirus-covid-19-infections/clinical-](https://www.aap.org/en/pages/2019-novel-coronavirus-covid-19-infections/clinical-guidance/covid-19-planning-considerations-return-to-in-person-education-in-schools/)  
621 [guidance/covid-19-planning-considerations-return-to-in-person-education-in-schools/](https://www.aap.org/en/pages/2019-novel-coronavirus-covid-19-infections/clinical-guidance/covid-19-planning-considerations-return-to-in-person-education-in-schools/)
- 622 10. Ehrhardt J, Ekinci A, Krehl H, Meincke M, Finci I, Klein J, et al. Transmission of SARS-  
623 CoV-2 in children aged 0 to 19 years in childcare facilities and schools after their  
624 reopening in May 2020, Baden-Württemberg, Germany. *Eurosurveillance*. 2020;25:  
625 2001587. doi:10.2807/1560-7917.ES.2020.25.36.2001587
- 626 11. Macartney K, Quinn HE, Pillsbury AJ, Koirala A, Deng L, Winkler N, et al.  
627 Transmission of SARS-CoV-2 in Australian educational settings: a prospective cohort  
628 study. *The Lancet Child & adolescent health*. 2020/08/03. 2020;4: 807–816.  
629 doi:10.1016/S2352-4642(20)30251-0

- 630 12. Larosa E, Djuric O, Cassinadri M, Cilloni S, Bisaccia E, Vicentini M, et al. Secondary  
631 transmission of COVID-19 in preschool and school settings in northern Italy after their  
632 reopening in September 2020: a population-based study. *Euro surveillance : bulletin*  
633 *Europeen sur les maladies transmissibles = European communicable disease bulletin.*  
634 2020;25: 2001911. doi:10.2807/1560-7917.ES.2020.25.49.2001911
- 635 13. Ismail SA, Saliba V, Lopez Bernal J, Ramsay ME, Ladhani SN. SARS-CoV-2 infection  
636 and transmission in educational settings: a prospective, cross-sectional analysis of  
637 infection clusters and outbreaks in England. *The Lancet Infectious diseases.*  
638 2020/12/08. 2021;21: 344–353. doi:10.1016/S1473-3099(20)30882-3
- 639 14. Lopez AS, Hill M, Antezano J, Vilven D, Rutner T, Bogdanow L, et al. Transmission  
640 Dynamics of COVID-19 Outbreaks Associated with Child Care Facilities - Salt Lake  
641 City, Utah, April-July 2020. *MMWR Morbidity and mortality weekly report.* 2020;69:  
642 1319–1323. doi:10.15585/mmwr.mm6937e3
- 643 15. Rambaut A, Holmes EC, O’Toole Á, Hill V, McCrone JT, Ruis C, et al. A dynamic  
644 nomenclature proposal for SARS-CoV-2 lineages to assist genomic epidemiology.  
645 *Nature Microbiology.* 2020;5: 1403–1407. doi:10.1038/s41564-020-0770-5
- 646 16. Lam-Hine T, McCurdy SA, Santora L, Duncan L, Corbett-Detig R, Kapusinszky B, et  
647 al. Outbreak Associated with SARS-CoV-2 B.1.617.2 (Delta) Variant in an Elementary  
648 School - Marin County, California, May-June 2021. *MMWR Morbidity and mortality*  
649 *weekly report.* 2021;70: 1214–1219. doi:10.15585/mmwr.mm7035e2
- 650 17. Leuzinger K, Gosert R, Søggaard KK, Naegele K, Bielicki J, Roloff T, et al.  
651 Epidemiology and precision of SARS-CoV-2 detection following lockdown and  
652 relaxation measures. *Journal of Medical Virology.* 2021;93: 2374–2384.  
653 doi:<https://doi.org/10.1002/jmv.26731>
- 654 18. Leuzinger K, Roloff T, Gosert R, Sogaard K, Naegele K, Rentsch K, et al.  
655 Epidemiology of Severe Acute Respiratory Syndrome Coronavirus 2 Emergence  
656 Amidst Community-Acquired Respiratory Viruses. *The Journal of infectious diseases.*  
657 2020;222: 1270–1279. doi:10.1093/infdis/jiaa464
- 658 19. Stange M, Mari A, Roloff T, Seth-Smith HMB, Schweitzer M, Brunner M, et al. SARS-  
659 CoV-2 outbreak in a tri-national urban area is dominated by a B.1 lineage variant  
660 linked to a mass gathering event. *PLoS Pathogens.* 2021;17: 1–20.  
661 doi:10.1371/journal.ppat.1009374
- 662 20. Egli A, Blanc DS, Greub G, Keller PM, Lazarevic V, Lebrand A, et al. Improving the  
663 quality and workflow of bacterial genome sequencing and analysis: paving the way for  
664 a Switzerland-wide molecular epidemiological surveillance platform. *Swiss Medical*  
665 *Weekly.* 2018;148: w14693. doi:10.4414/smw.2018.14693
- 666 21. R Core Team. R: A language and environment for statistical computing. Vienna,  
667 Austria: R Foundation for Statistical Computing; 2020. Available: [https://www.r-](https://www.r-project.org/)  
668 [project.org/](https://www.r-project.org/)
- 669 22. van Rossum G, Drake Jr FL. Python reference manual. Centrum voor Wiskunde en  
670 Informatica Amsterdam; 1995.

- 671 23. Barnier J, Briatte F, Larmarange J. questionr: Functions to Make Surveys Processing  
672 Easier. 2020.
- 673 24. Wickham H. tidy: Tidy Messy Data. 2021.
- 674 25. Wickham H. ggplot2: Elegant Graphics for Data Analysis. New York: Springer-Verlag;  
675 2016.
- 676 26. Bailiss C. pivottabler: Create Pivot Tables. R package version 1.5.2. 2021. Available:  
677 <https://cran.r-project.org/package=pivottabler>
- 678 27. Müller K, Wickham H. tibble: Simple Data Frames. 2021.
- 679 28. Rudis B. hrbrthemes: Additional Themes, Theme Components and Utilities for  
680 'ggplot2. 2020.
- 681 29. Kassambara A. ggpubr: "ggplot2" Based Publication Ready Plots.
- 682 30. The pandas development team. pandas-dev/pandas: Pandas 1.2.4. Zenodo; 2020.
- 683 31. Sievert C. Interactive Web-Based Data Visualization with R, plotly, and shiny.  
684 Chapman and Hall/CRC; 2020.
- 685 32. Goncalves Cabecinhas AR, Roloff T, Stange M, Bertelli C, Huber M, Ramette A, et al.  
686 SARS-CoV-2 N501Y Introductions and Transmissions in Switzerland from Beginning  
687 of October 2020 to February 2021—Implementation of Swiss-Wide Diagnostic  
688 Screening and Whole Genome Sequencing. *Microorganisms* . 2021.  
689 doi:10.3390/microorganisms9040677
- 690 33. Peter JK, Wegner F, Gsponer S, Helfenstein F, Roloff T, Tarnutzer R, et al. SARS-  
691 CoV-2 vaccine Alpha and Delta variant breakthrough infections are rare and mild, but  
692 happen relative early after vaccination. medRxiv. 2021; 2021.12.23.21268324.  
693 doi:10.1101/2021.12.23.21268324
- 694 34. Statistisches Amt Basel-Stadt: Bevölkerungsstatistik. Wohnbevölkerung am  
695 Jahresende nach Alter. Statistisches Jahrbuch des Kantons Basel-Stadt. Statistisches  
696 Amt Basel-Stadt: Bevölkerungsstatistik; 2021.
- 697 35. Hershov RB, Wu K, Lewis NM, Milne AT, Currie D, Smith AR, et al. Low SARS-CoV-2  
698 Transmission in Elementary Schools - Salt Lake County, Utah, December 3, 2020-  
699 January 31, 2021. *MMWR Morbidity and mortality weekly report*. 2021;70: 442–448.  
700 doi:10.15585/mmwr.mm7012e3
- 701 36. Goldstein E, Lipsitch M, Cevik M. On the Effect of Age on the Transmission of SARS-  
702 CoV-2 in Households, Schools, and the Community. *The Journal of infectious  
703 diseases*. 2021;223: 362–369. doi:10.1093/infdis/jiaa691
- 704 37. Meyer M, Holfter A, Ruebsteck E, Gruell H, Dewald F, Koerner RW, et al. The Alpha  
705 Variant (B.1.1.7) of SARS-CoV-2 in Children: First Experience from 3544 Nucleic Acid  
706 Amplification Tests in a Cohort of Children in Germany. *Viruses*. 2021. p. 1600.  
707 doi:10.3390/v13081600

- 708 38. Gorgels KMF, Alphen LB, Veer BMJW van der, Hackert VH, Hensels AYJ, Heijer CDJ,  
709 et al. Increased Transmissibility of SARS-CoV-2 Alpha Variant (B.1.1.7) in Children:  
710 Three Large Primary School Outbreaks Revealed by Whole Genome Sequencing in  
711 the Netherlands. PREPRINT (Version 1) available at Research Square. 2021.  
712 doi:10.21203/rs.3.rs-1107495/v1
- 713 39. Cheng Y, Ma N, Witt C, Rapp S, Wild PS, Andreae MO, et al. Face masks effectively  
714 limit the probability of SARS-CoV-2 transmission. Science (New York, NY). 2021;  
715 eabg6296. doi:10.1126/science.abg6296
- 716
