# Supplementary material for: SARS-CoV-2 in schools: genome analysis shows that concurrent cases in the second and third wave were often unconnected
Source: bioRxiv or medRxiv preprint supplement (doi:10.1101/2022.01.26.22269824), 2022-01-28
Supplement: Supplementary file [file media-1.pdf]

# Supplementary figures and tables

## **SARS-CoV-2 in schools: genome analysis shows that concurrent cases in the second and third wave were often unconnected**

Madlen Stange<sup>1,2,3,4¶</sup>, Eva Wuerfel<sup>5¶</sup>, Jelissa Katharina Peter<sup>6¶</sup>, Helena Seth-Smith<sup>1,2,3</sup>, Tim Roloff<sup>1,2,3</sup>, Severin Gsponer<sup>6</sup>, Alfredo Mari<sup>1,3</sup>, Blanca Cabrera Gil<sup>7</sup>, Aitana Lebrand<sup>7</sup>, Fanny Wegner<sup>1,2,3</sup>, Ulrich Heininger<sup>8</sup>, Julia Bielicki<sup>8</sup>, Sarah Tschudin Sutter<sup>9</sup>, Tanja Stadler<sup>3,10</sup>, Karoline Leuzinger<sup>11,12</sup>, Hans H. Hirsch<sup>9,11,12</sup>, Markus Ledergerber<sup>5</sup>, Simon Fuchs<sup>6</sup>, Adrian Egli<sup>1,2\*</sup>

<sup>1</sup> Applied Microbiology Research, Department of Biomedicine, University of Basel, Basel, Switzerland

<sup>2</sup> Division of Clinical Bacteriology and Mycology, University Hospital Basel, Basel, Switzerland

<sup>3</sup> SIB Swiss Institute of Bioinformatics - Basel, Switzerland

<sup>4</sup> Centre for Molecular Biodiversity Research, Leibniz Institute for the Analysis of Biodiversity Change / ZFMK, Museum Koenig, Bonn, Germany

<sup>5</sup> Child and Youth Health Service, Department of Health Basel-City, Basel, Switzerland

<sup>6</sup> Department of Health Basel-City, Basel, Switzerland

<sup>7</sup> SIB Swiss Institute of Bioinformatics - Geneva, Switzerland

<sup>8</sup> Pediatric Infectious Diseases, Children's University Hospital Basel and University of Basel, Basel, Switzerland

<sup>9</sup> Infectious Diseases and Hospital Epidemiology, University Hospital Basel and University of Basel, Basel, Switzerland

<sup>10</sup> Department of Biosystems Science and Engineering, ETH Zurich, Basel, Switzerland

<sup>11</sup> Clinical Virology, University Hospital Basel, Basel, Switzerland

<sup>12</sup> Transplantation & Clinical Virology, Department of Biomedicine, University of Basel, Basel, Switzerland

\* Corresponding author

Email: [adrian.egli@usb.ch](mailto:adrian.egli@usb.ch)

Prof. Adrian Egli, MD PhD

Division of Clinical Bacteriology and Mycology

University Hospital Basel

Petersgraben 4

4031 Basel, Switzerland

Email: [adrian.egli@usb.ch](mailto:adrian.egli@usb.ch)

¶ These authors contributed equally to this work.

# Figures

01.10.2020-31.05.2021 entire observational period

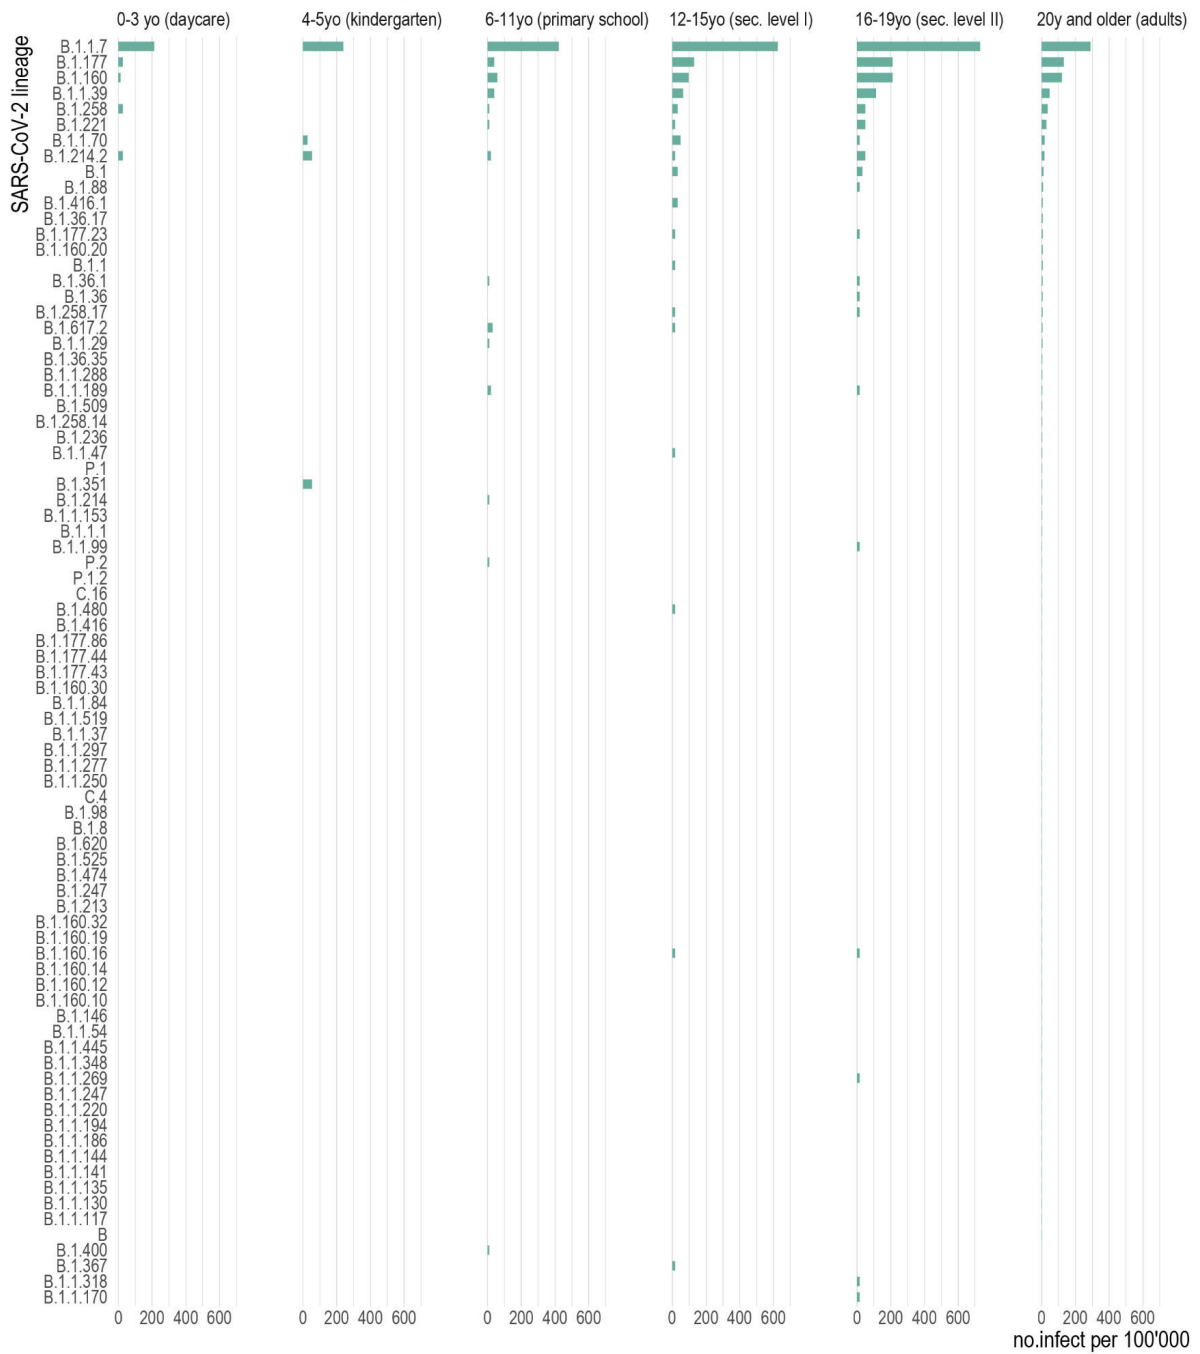

**Fig. S1.** Population normalised SARS-CoV-2 lineage-specific prevalence per 100'000 inhabitants per age category (corresponding school levels shown in brackets) shown for the entire observational period.

01.10.2020-31.12.2020 - pre-VOC/second wave

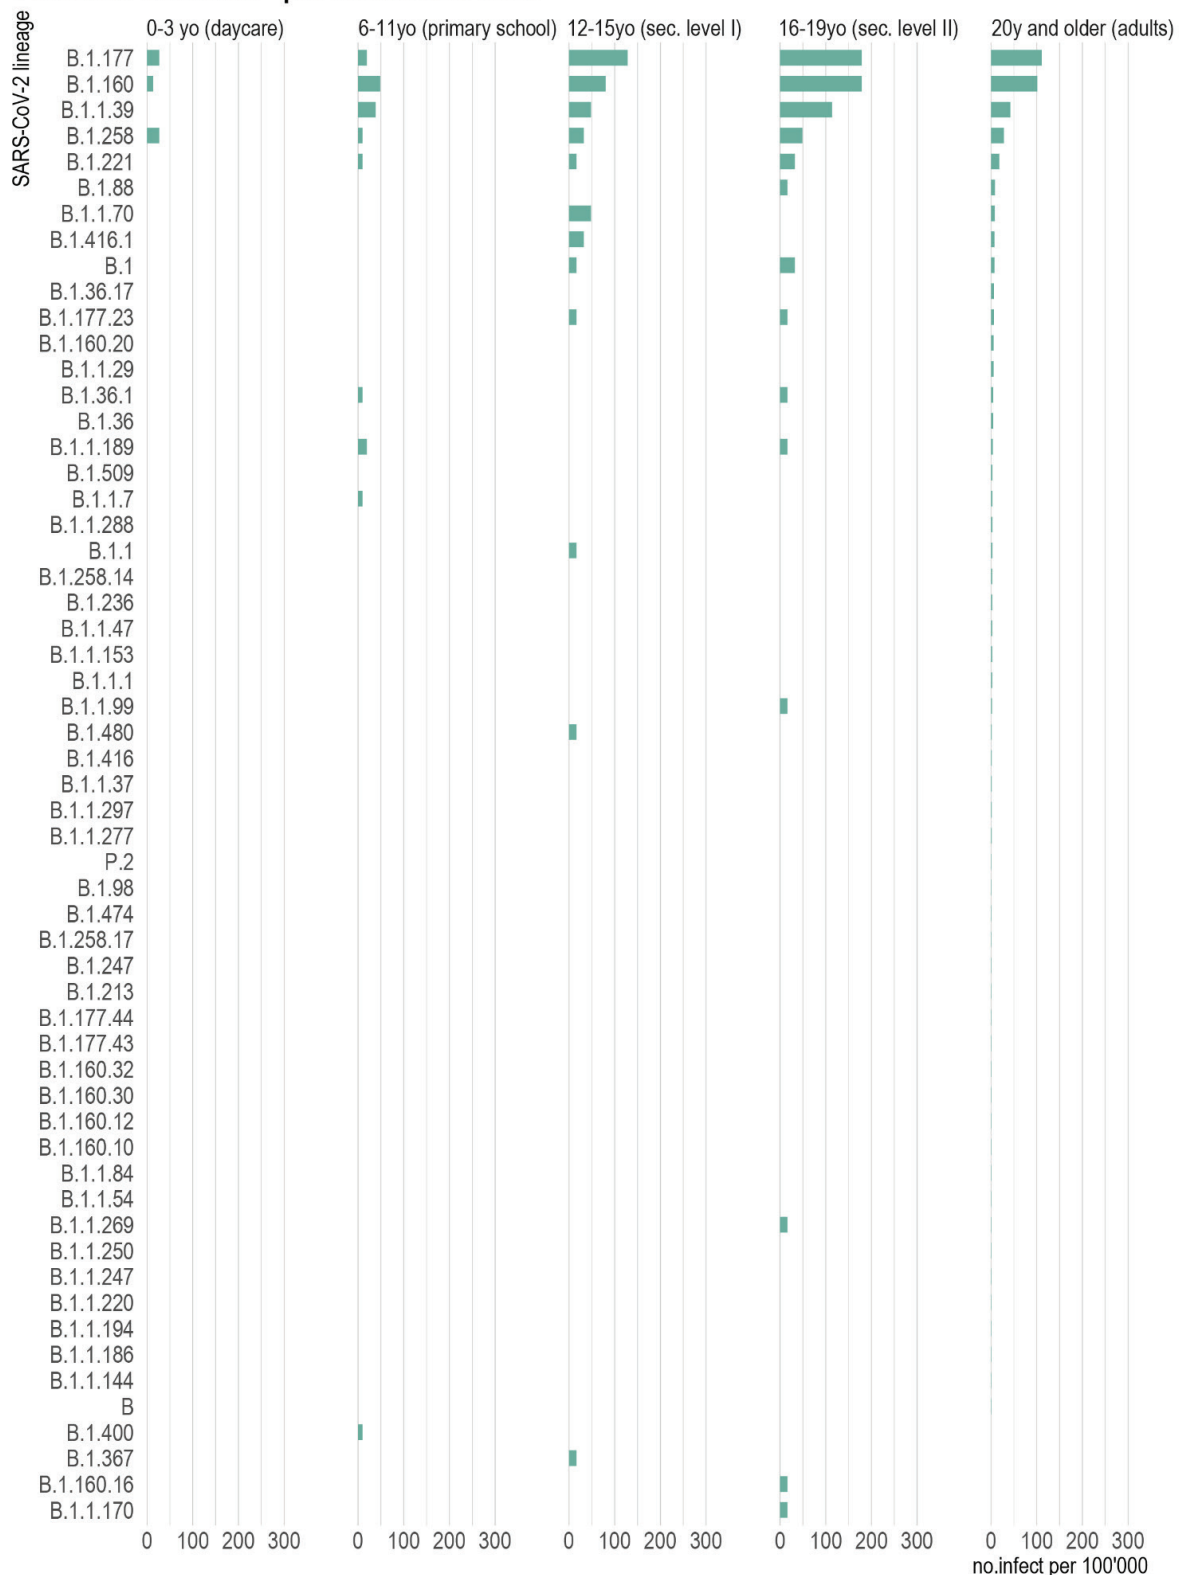

**Fig. S2.** Population normalised SARS-CoV-2 lineage-specific prevalence per 100'000 inhabitants per age category (corresponding school levels shown in brackets) in the canton of Basel-City, shown for the second wave before the establishment of the alpha variant, from 1 October 2020 until 31 December 2020. Note, that during this period no cases among children of 4 and 5 years (kindergarten age) were recorded.

01.01.2021-28.02.2021 - VOC/Second wave

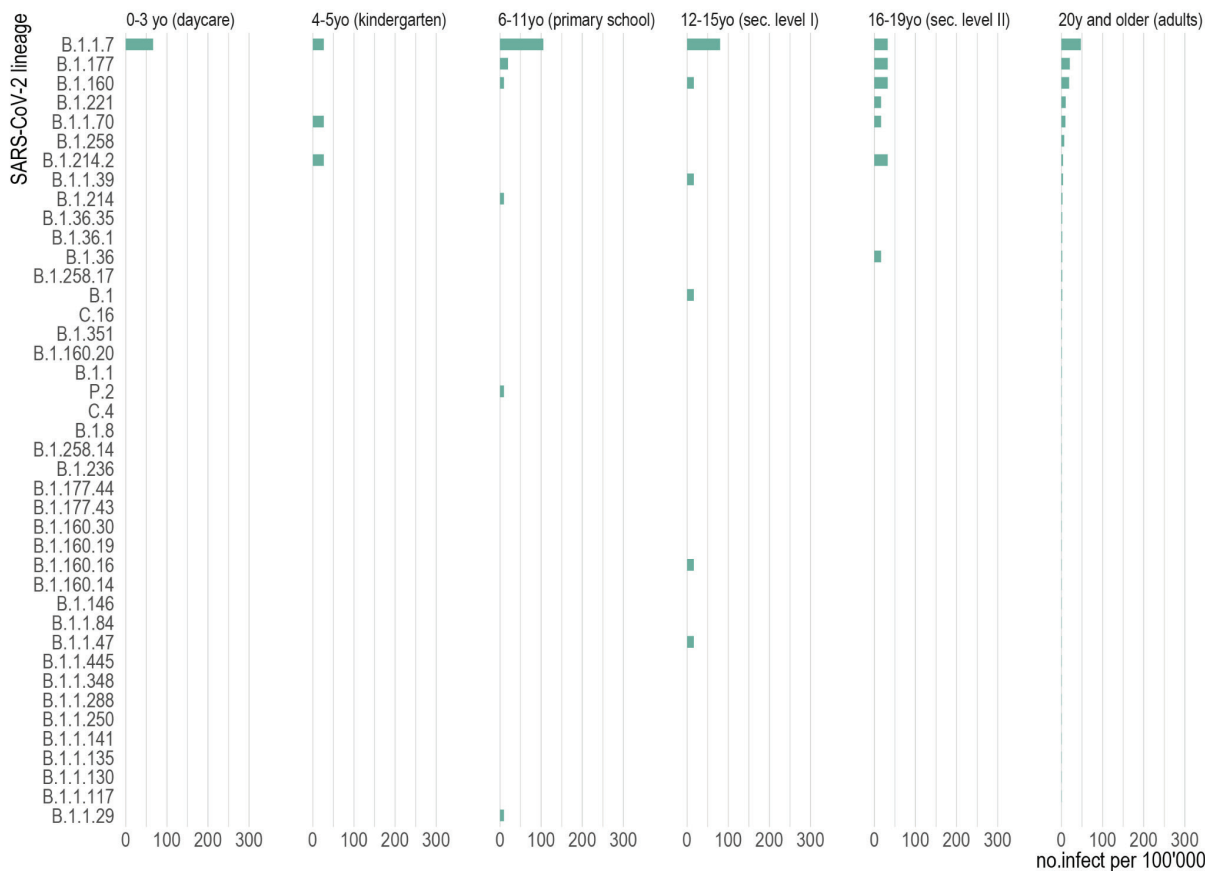

**Fig. S3.** Population normalised SARS-CoV-2 lineage-specific prevalence per 100'000 inhabitants per age category (corresponding school levels shown in brackets) in the canton of Basel-City, shown for the second wave with the establishment of the alpha variant, from 1 January 2021 to 28 February 2021.

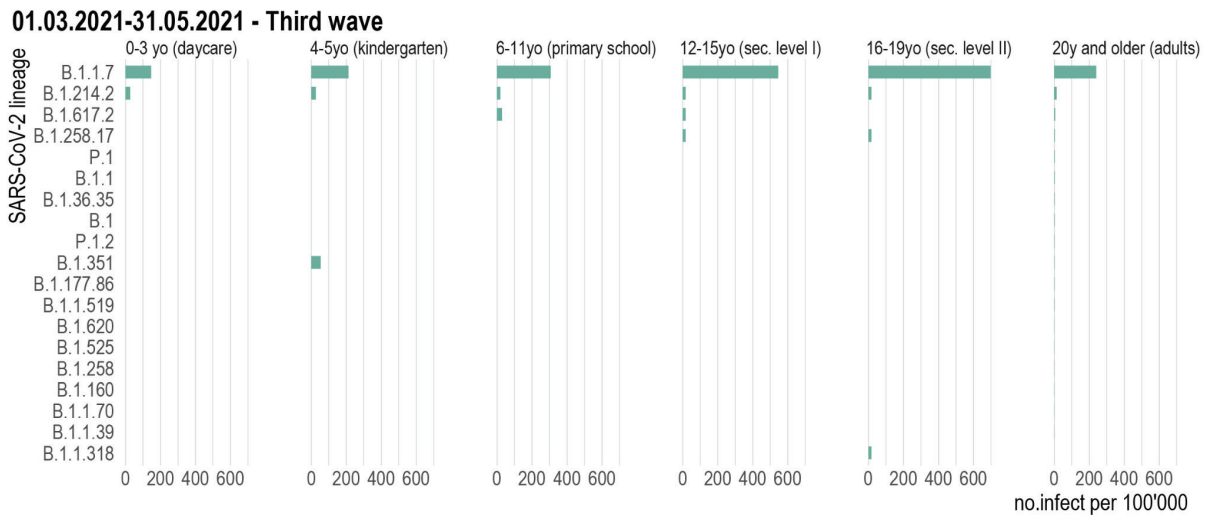

**Fig. S4.** Population normalised SARS-CoV-2 lineage-specific prevalence per 100'000 inhabitants per age category (corresponding school levels shown in brackets) in the canton of Basel-City, shown for the third wave, from 1 March 2021 to 31 May 2021.

## Tables

**Table S1.** Case definition, legitimacy and applied measures during study period.

| Case                                      | Legitimacy                                                                                                                               | Measure                                                                                                                    |
|-------------------------------------------|------------------------------------------------------------------------------------------------------------------------------------------|----------------------------------------------------------------------------------------------------------------------------|
| <b>Index Person (IP)</b>                  | Positive PCR test in symptomatic or asymptomatic individuals or positive antigen test in symptomatic individuals                         | 10 day isolation beginning from the day of first symptoms or the day of sampling in asymptomatic individuals               |
| <b>Close Contact Person (CCP)</b>         | Contact with less than 1.5 meters distance for more than 15 minutes without sufficient protective measures (e.g., wearing of masks)      | 10 day quarantine beginning from the day of last close contact                                                             |
| <b>Household Member of CCP</b>            | Individual living in the same household as CCP                                                                                           | From January 22 2021 to March 5 2021: 10 day quarantine with CCP                                                           |
| <b>Second Degree Close Contact Person</b> | Close contact person of CCP (Contact with less than 1.5 meters distance for more than 15 minutes without sufficient protective measures) | From January 22 2021 to March 5 2021: Recommendation to test (PCR) between the 5th and 10th day after close contact to CCP |
| <b>CCP not obliged for quarantine</b>     | Fully vaccinated individuals and individuals with a SCoV2 infection up to six months prior to the close contact                          | None                                                                                                                       |

**Table S2.** GISAID identifiers for SARS-CoV-2 genomes from Basel-City residents with test dates between 01.10.2020 and 31.05.2021. Identifiers in bold and italics with known age (not publicly disclosed) used to infer whether children in specific age classes are more at risk to be infected with specific SARS-CoV-2 lineages; normal and italics used for the analysis of transmission direction.

|                        |                        |                        |
|------------------------|------------------------|------------------------|
| EPI_ISL_1036070        | <b>EPI_ISL_1036127</b> | <b>EPI_ISL_1233691</b> |
| EPI_ISL_1036130        | <b>EPI_ISL_830729</b>  | <b>EPI_ISL_1233663</b> |
| <b>EPI_ISL_830730</b>  | <b>EPI_ISL_830731</b>  | <b>EPI_ISL_896081</b>  |
| EPI_ISL_2610950        | <b>EPI_ISL_1036084</b> | <b>EPI_ISL_896083</b>  |
| <b>EPI_ISL_896080</b>  | <b>EPI_ISL_830732</b>  | <b>EPI_ISL_1036069</b> |
| EPI_ISL_1036135        | <b>EPI_ISL_1233629</b> | <b>EPI_ISL_830734</b>  |
| <b>EPI_ISL_1233628</b> | <b>EPI_ISL_861857</b>  | <b>EPI_ISL_1036102</b> |
| <b>EPI_ISL_896108</b>  | <b>EPI_ISL_1233692</b> | <b>EPI_ISL_896071</b>  |
|                        | <b>EPI_ISL_830727</b>  | <b>EPI_ISL_830733</b>  |

|                        |
|------------------------|
| <b>EPI_ISL_896115</b>  |
| <b>EPI_ISL_2361631</b> |
| <b>EPI_ISL_1036116</b> |
| <b>EPI_ISL_1233630</b> |
| <b>EPI_ISL_896092</b>  |
| <b>EPI_ISL_1233667</b> |
| <b>EPI_ISL_861858</b>  |
| <b>EPI_ISL_2180925</b> |
| <b>EPI_ISL_861856</b>  |
| <b>EPI_ISL_896097</b>  |
| <b>EPI_ISL_896106</b>  |
| <b>EPI_ISL_2420665</b> |
| <b>EPI_ISL_1036100</b> |
| <b>EPI_ISL_1036117</b> |
| <b>EPI_ISL_896077</b>  |
| <b>EPI_ISL_930950</b>  |
| <b>EPI_ISL_896079</b>  |
| <b>EPI_ISL_896082</b>  |
| <b>EPI_ISL_830735</b>  |

|                        |
|------------------------|
| <b>EPI_ISL_930878</b>  |
| <b>EPI_ISL_1233664</b> |
| <b>EPI_ISL_896096</b>  |
| <b>EPI_ISL_2361625</b> |
| <b>EPI_ISL_1233637</b> |
| <b>EPI_ISL_1014705</b> |
| <b>EPI_ISL_2420702</b> |
| <b>EPI_ISL_1036126</b> |
| <b>EPI_ISL_3344073</b> |
| <b>EPI_ISL_1036137</b> |
| <b>EPI_ISL_896073</b>  |
| <b>EPI_ISL_930937</b>  |
| <b>EPI_ISL_1014704</b> |
| <i>EPI_ISL_930976</i>  |
| <i>EPI_ISL_2484550</i> |
| <i>EPI_ISL_2484562</i> |
| <i>EPI_ISL_2484231</i> |
| <i>EPI_ISL_2484372</i> |
| <i>EPI_ISL_2484461</i> |

|                       |
|-----------------------|
| <i>EPI_ISL_830823</i> |
| <i>EPI_ISL_830824</i> |
| <i>EPI_ISL_830825</i> |
| <i>EPI_ISL_830826</i> |
| <i>EPI_ISL_830827</i> |
| <i>EPI_ISL_830828</i> |
| <i>EPI_ISL_830829</i> |
| <i>EPI_ISL_830830</i> |
| <i>EPI_ISL_830831</i> |
| <i>EPI_ISL_830832</i> |
| <i>EPI_ISL_830833</i> |
| <i>EPI_ISL_830834</i> |
| <i>EPI_ISL_830835</i> |
| <i>EPI_ISL_830836</i> |
| <i>EPI_ISL_830837</i> |
| <i>EPI_ISL_830838</i> |
| <i>EPI_ISL_830839</i> |
| <i>EPI_ISL_830840</i> |
| <i>EPI_ISL_830841</i> |



|                       |
|-----------------------|
| <i>EPI_ISL_830842</i> |
| <i>EPI_ISL_830843</i> |
| <i>EPI_ISL_842649</i> |
| <i>EPI_ISL_830844</i> |
| <i>EPI_ISL_830845</i> |
| <i>EPI_ISL_830846</i> |
| <i>EPI_ISL_830847</i> |
| <i>EPI_ISL_830848</i> |
| <i>EPI_ISL_830849</i> |
| <i>EPI_ISL_830850</i> |
| <i>EPI_ISL_830851</i> |
| <i>EPI_ISL_830852</i> |
| <i>EPI_ISL_830853</i> |
| <i>EPI_ISL_830854</i> |
| <i>EPI_ISL_830855</i> |
| <i>EPI_ISL_830856</i> |
| <i>EPI_ISL_830857</i> |
| <i>EPI_ISL_830858</i> |
| <i>EPI_ISL_830859</i> |

|                       |
|-----------------------|
| <i>EPI_ISL_830860</i> |
| <i>EPI_ISL_830861</i> |
| <i>EPI_ISL_830862</i> |
| <i>EPI_ISL_830863</i> |
| <i>EPI_ISL_830864</i> |
| <i>EPI_ISL_830865</i> |
| <i>EPI_ISL_830866</i> |
| <i>EPI_ISL_830867</i> |
| <i>EPI_ISL_830868</i> |
| <i>EPI_ISL_830869</i> |
| <i>EPI_ISL_830984</i> |
| <i>EPI_ISL_830870</i> |
| <i>EPI_ISL_830871</i> |
| <i>EPI_ISL_830872</i> |
| <i>EPI_ISL_842650</i> |
| <i>EPI_ISL_830873</i> |
| <i>EPI_ISL_830874</i> |
| <i>EPI_ISL_830875</i> |
| <i>EPI_ISL_830876</i> |

|                       |
|-----------------------|
| <i>EPI_ISL_830877</i> |
| <i>EPI_ISL_830878</i> |
| <i>EPI_ISL_830879</i> |
| <i>EPI_ISL_830880</i> |
| <i>EPI_ISL_830881</i> |
| <i>EPI_ISL_830882</i> |
| <i>EPI_ISL_830883</i> |
| <i>EPI_ISL_830884</i> |
| <i>EPI_ISL_830885</i> |
| <i>EPI_ISL_830886</i> |
| <i>EPI_ISL_830990</i> |
| <i>EPI_ISL_830887</i> |
| <i>EPI_ISL_830888</i> |
| <i>EPI_ISL_830889</i> |
| <i>EPI_ISL_830890</i> |
| <i>EPI_ISL_830991</i> |
| <i>EPI_ISL_830891</i> |
| <i>EPI_ISL_830892</i> |
| <i>EPI_ISL_830893</i> |

|                       |
|-----------------------|
| <i>EPI_ISL_830894</i> |
| <i>EPI_ISL_830895</i> |
| <i>EPI_ISL_830896</i> |
| <i>EPI_ISL_830897</i> |
| <i>EPI_ISL_830898</i> |
| <i>EPI_ISL_830899</i> |
| <i>EPI_ISL_830900</i> |
| <i>EPI_ISL_830901</i> |
| <i>EPI_ISL_830902</i> |
| <i>EPI_ISL_830903</i> |
| <i>EPI_ISL_830904</i> |
| <i>EPI_ISL_830905</i> |
| <i>EPI_ISL_830906</i> |
| <i>EPI_ISL_830907</i> |
| <i>EPI_ISL_830908</i> |
| <i>EPI_ISL_830909</i> |
| <i>EPI_ISL_830910</i> |
| <i>EPI_ISL_830911</i> |
| <i>EPI_ISL_830912</i> |

|                       |
|-----------------------|
| <i>EPI_ISL_830913</i> |
| <i>EPI_ISL_830914</i> |
| <i>EPI_ISL_830915</i> |
| <i>EPI_ISL_830916</i> |
| <i>EPI_ISL_830992</i> |
| <i>EPI_ISL_830993</i> |
| <i>EPI_ISL_830777</i> |
| <i>EPI_ISL_830917</i> |
| <i>EPI_ISL_830918</i> |
| <i>EPI_ISL_830919</i> |
| <i>EPI_ISL_830920</i> |
| <i>EPI_ISL_830921</i> |
| <i>EPI_ISL_830922</i> |
| <i>EPI_ISL_830923</i> |
| <i>EPI_ISL_830778</i> |
| <i>EPI_ISL_830924</i> |
| <i>EPI_ISL_830994</i> |
| <i>EPI_ISL_830925</i> |
| <i>EPI_ISL_830926</i> |

|                       |
|-----------------------|
| <i>EPI_ISL_830927</i> |
| <i>EPI_ISL_830928</i> |
| <i>EPI_ISL_830929</i> |
| <i>EPI_ISL_830930</i> |
| <i>EPI_ISL_830931</i> |
| <i>EPI_ISL_830932</i> |
| <i>EPI_ISL_830995</i> |
| <i>EPI_ISL_830933</i> |
| <i>EPI_ISL_830934</i> |
| <i>EPI_ISL_830935</i> |
| <i>EPI_ISL_830936</i> |
| <i>EPI_ISL_830937</i> |
| <i>EPI_ISL_830938</i> |
| <i>EPI_ISL_830939</i> |
| <i>EPI_ISL_830996</i> |
| <i>EPI_ISL_830940</i> |
| <i>EPI_ISL_830997</i> |
| <i>EPI_ISL_830941</i> |
| <i>EPI_ISL_830942</i> |

|                       |
|-----------------------|
| <i>EPI_ISL_830943</i> |
| <i>EPI_ISL_830944</i> |
| <i>EPI_ISL_830945</i> |
| <i>EPI_ISL_830946</i> |
| <i>EPI_ISL_830947</i> |
| <i>EPI_ISL_830998</i> |
| <i>EPI_ISL_830948</i> |
| <i>EPI_ISL_830949</i> |
| <i>EPI_ISL_830950</i> |
| <i>EPI_ISL_830951</i> |
| <i>EPI_ISL_830952</i> |
| <i>EPI_ISL_830953</i> |
| <i>EPI_ISL_830954</i> |
| <i>EPI_ISL_830955</i> |
| <i>EPI_ISL_830999</i> |
| <i>EPI_ISL_830956</i> |
| <i>EPI_ISL_830957</i> |
| <i>EPI_ISL_830958</i> |
| <i>EPI_ISL_830959</i> |

|                       |
|-----------------------|
| <i>EPI_ISL_830960</i> |
| <i>EPI_ISL_830961</i> |
| <i>EPI_ISL_831000</i> |
| <i>EPI_ISL_830962</i> |
| <i>EPI_ISL_830963</i> |
| <i>EPI_ISL_830964</i> |
| <i>EPI_ISL_830965</i> |
| <i>EPI_ISL_830966</i> |
| <i>EPI_ISL_830967</i> |
| <i>EPI_ISL_830968</i> |
| <i>EPI_ISL_830969</i> |
| <i>EPI_ISL_830970</i> |
| <i>EPI_ISL_830971</i> |
| <i>EPI_ISL_830972</i> |
| <i>EPI_ISL_830973</i> |
| <i>EPI_ISL_830974</i> |
| <i>EPI_ISL_830975</i> |
| <i>EPI_ISL_830976</i> |
| <i>EPI_ISL_830977</i> |

|                       |
|-----------------------|
| <i>EPI_ISL_930861</i> |
| <i>EPI_ISL_930864</i> |
| <i>EPI_ISL_930865</i> |
| <i>EPI_ISL_930868</i> |
| <i>EPI_ISL_930872</i> |
| <i>EPI_ISL_930873</i> |
| <i>EPI_ISL_930874</i> |
| <i>EPI_ISL_930875</i> |
| <i>EPI_ISL_930876</i> |
| <i>EPI_ISL_930877</i> |
| <i>EPI_ISL_930879</i> |
| <i>EPI_ISL_930880</i> |
| <i>EPI_ISL_930882</i> |
| <i>EPI_ISL_930883</i> |
| <i>EPI_ISL_930885</i> |
| <i>EPI_ISL_930886</i> |
| <i>EPI_ISL_930887</i> |
| <i>EPI_ISL_930888</i> |
| <i>EPI_ISL_930909</i> |

|                       |
|-----------------------|
| <i>EPI_ISL_930889</i> |
| <i>EPI_ISL_930890</i> |
| <i>EPI_ISL_930894</i> |
| <i>EPI_ISL_930895</i> |
| <i>EPI_ISL_930910</i> |
| <i>EPI_ISL_930896</i> |
| <i>EPI_ISL_930898</i> |
| <i>EPI_ISL_930911</i> |
| <i>EPI_ISL_930912</i> |
| <i>EPI_ISL_930913</i> |
| <i>EPI_ISL_930900</i> |
| <i>EPI_ISL_930914</i> |
| <i>EPI_ISL_930915</i> |
| <i>EPI_ISL_930917</i> |
| <i>EPI_ISL_930901</i> |
| <i>EPI_ISL_930902</i> |
| <i>EPI_ISL_930904</i> |
| <i>EPI_ISL_930918</i> |
| <i>EPI_ISL_930920</i> |

|                       |
|-----------------------|
| <i>EPI_ISL_930923</i> |
| <i>EPI_ISL_930924</i> |
| <i>EPI_ISL_930925</i> |
| <i>EPI_ISL_930926</i> |
| <i>EPI_ISL_930927</i> |
| <i>EPI_ISL_930928</i> |
| <i>EPI_ISL_930969</i> |
| <i>EPI_ISL_930929</i> |
| <i>EPI_ISL_930934</i> |
| <i>EPI_ISL_930935</i> |
| <i>EPI_ISL_930936</i> |
| <i>EPI_ISL_930970</i> |
| <i>EPI_ISL_930938</i> |
| <i>EPI_ISL_930939</i> |
| <i>EPI_ISL_930940</i> |
| <i>EPI_ISL_930971</i> |
| <i>EPI_ISL_930972</i> |
| <i>EPI_ISL_930973</i> |
| <i>EPI_ISL_930943</i> |

|                        |
|------------------------|
| <i>EPI_ISL_930944</i>  |
| <i>EPI_ISL_930945</i>  |
| <i>EPI_ISL_930946</i>  |
| <i>EPI_ISL_930947</i>  |
| <i>EPI_ISL_930948</i>  |
| <i>EPI_ISL_930949</i>  |
| <i>EPI_ISL_930951</i>  |
| <i>EPI_ISL_930952</i>  |
| <i>EPI_ISL_930953</i>  |
| <i>EPI_ISL_930955</i>  |
| <i>EPI_ISL_930956</i>  |
| <i>EPI_ISL_930957</i>  |
| <i>EPI_ISL_930958</i>  |
| <i>EPI_ISL_930959</i>  |
| <i>EPI_ISL_931396</i>  |
| <i>EPI_ISL_831001</i>  |
| <i>EPI_ISL_1014691</i> |
| <i>EPI_ISL_930977</i>  |
| <i>EPI_ISL_930978</i>  |

|                       |
|-----------------------|
| <i>EPI_ISL_930979</i> |
| <i>EPI_ISL_930980</i> |
| <i>EPI_ISL_930983</i> |
| <i>EPI_ISL_930984</i> |
| <i>EPI_ISL_930985</i> |
| <i>EPI_ISL_930992</i> |
| <i>EPI_ISL_930993</i> |
| <i>EPI_ISL_930994</i> |
| <i>EPI_ISL_930995</i> |
| <i>EPI_ISL_930996</i> |
| <i>EPI_ISL_930997</i> |
| <i>EPI_ISL_930998</i> |
| <i>EPI_ISL_931001</i> |
| <i>EPI_ISL_931002</i> |
| <i>EPI_ISL_931003</i> |
| <i>EPI_ISL_931005</i> |
| <i>EPI_ISL_931006</i> |
| <i>EPI_ISL_931007</i> |
| <i>EPI_ISL_931008</i> |

|                       |
|-----------------------|
| <i>EPI_ISL_931009</i> |
| <i>EPI_ISL_931010</i> |
| <i>EPI_ISL_931011</i> |
| <i>EPI_ISL_931013</i> |
| <i>EPI_ISL_931014</i> |
| <i>EPI_ISL_931016</i> |
| <i>EPI_ISL_931019</i> |
| <i>EPI_ISL_931020</i> |
| <i>EPI_ISL_931021</i> |
| <i>EPI_ISL_931022</i> |
| <i>EPI_ISL_931023</i> |
| <i>EPI_ISL_931024</i> |
| <i>EPI_ISL_931026</i> |
| <i>EPI_ISL_931027</i> |
| <i>EPI_ISL_931029</i> |
| <i>EPI_ISL_931036</i> |
| <i>EPI_ISL_931030</i> |
| <i>EPI_ISL_931031</i> |
| <i>EPI_ISL_931038</i> |

|                       |
|-----------------------|
| <i>EPI_ISL_931040</i> |
| <i>EPI_ISL_931041</i> |
| <i>EPI_ISL_931042</i> |
| <i>EPI_ISL_930905</i> |
| <i>EPI_ISL_931044</i> |
| <i>EPI_ISL_931046</i> |
| <i>EPI_ISL_931047</i> |
| <i>EPI_ISL_931048</i> |
| <i>EPI_ISL_931049</i> |
| <i>EPI_ISL_931050</i> |
| <i>EPI_ISL_931052</i> |
| <i>EPI_ISL_931053</i> |
| <i>EPI_ISL_931054</i> |
| <i>EPI_ISL_931055</i> |
| <i>EPI_ISL_931056</i> |
| <i>EPI_ISL_931057</i> |
| <i>EPI_ISL_931058</i> |
| <i>EPI_ISL_931060</i> |
| <i>EPI_ISL_931062</i> |

|                       |
|-----------------------|
| <i>EPI_ISL_931063</i> |
| <i>EPI_ISL_931064</i> |
| <i>EPI_ISL_931065</i> |
| <i>EPI_ISL_931066</i> |
| <i>EPI_ISL_931068</i> |
| <i>EPI_ISL_931084</i> |
| <i>EPI_ISL_931070</i> |
| <i>EPI_ISL_931085</i> |
| <i>EPI_ISL_931086</i> |
| <i>EPI_ISL_931071</i> |
| <i>EPI_ISL_931087</i> |
| <i>EPI_ISL_931088</i> |
| <i>EPI_ISL_931398</i> |
| <i>EPI_ISL_931089</i> |
| <i>EPI_ISL_931090</i> |
| <i>EPI_ISL_931091</i> |
| <i>EPI_ISL_931399</i> |
| <i>EPI_ISL_931092</i> |
| <i>EPI_ISL_931093</i> |

|                       |
|-----------------------|
| <i>EPI_ISL_931094</i> |
| <i>EPI_ISL_931096</i> |
| <i>EPI_ISL_931097</i> |
| <i>EPI_ISL_931098</i> |
| <i>EPI_ISL_931099</i> |
| <i>EPI_ISL_931101</i> |
| <i>EPI_ISL_931102</i> |
| <i>EPI_ISL_931103</i> |
| <i>EPI_ISL_931104</i> |
| <i>EPI_ISL_931105</i> |
| <i>EPI_ISL_931106</i> |
| <i>EPI_ISL_931107</i> |
| <i>EPI_ISL_931108</i> |
| <i>EPI_ISL_830978</i> |
| <i>EPI_ISL_931111</i> |
| <i>EPI_ISL_931112</i> |
| <i>EPI_ISL_931116</i> |
| <i>EPI_ISL_931117</i> |
| <i>EPI_ISL_931118</i> |

|                       |
|-----------------------|
| <i>EPI_ISL_931120</i> |
| <i>EPI_ISL_931121</i> |
| <i>EPI_ISL_931122</i> |
| <i>EPI_ISL_931123</i> |
| <i>EPI_ISL_930906</i> |
| <i>EPI_ISL_931124</i> |
| <i>EPI_ISL_931128</i> |
| <i>EPI_ISL_931130</i> |
| <i>EPI_ISL_931132</i> |
| <i>EPI_ISL_931133</i> |
| <i>EPI_ISL_931134</i> |
| <i>EPI_ISL_931137</i> |
| <i>EPI_ISL_931138</i> |
| <i>EPI_ISL_931140</i> |
| <i>EPI_ISL_931141</i> |
| <i>EPI_ISL_931148</i> |
| <i>EPI_ISL_931149</i> |
| <i>EPI_ISL_931152</i> |
| <i>EPI_ISL_931153</i> |

|                       |
|-----------------------|
| <i>EPI_ISL_931155</i> |
| <i>EPI_ISL_931156</i> |
| <i>EPI_ISL_931158</i> |
| <i>EPI_ISL_931160</i> |
| <i>EPI_ISL_931161</i> |
| <i>EPI_ISL_931162</i> |
| <i>EPI_ISL_931163</i> |
| <i>EPI_ISL_931164</i> |
| <i>EPI_ISL_931165</i> |
| <i>EPI_ISL_931166</i> |
| <i>EPI_ISL_931168</i> |
| <i>EPI_ISL_931170</i> |
| <i>EPI_ISL_931172</i> |
| <i>EPI_ISL_931173</i> |
| <i>EPI_ISL_931199</i> |
| <i>EPI_ISL_931174</i> |
| <i>EPI_ISL_931175</i> |
| <i>EPI_ISL_931176</i> |
| <i>EPI_ISL_931177</i> |

|                       |
|-----------------------|
| <i>EPI_ISL_931179</i> |
| <i>EPI_ISL_931180</i> |
| <i>EPI_ISL_931181</i> |
| <i>EPI_ISL_931182</i> |
| <i>EPI_ISL_931183</i> |
| <i>EPI_ISL_931200</i> |
| <i>EPI_ISL_931184</i> |
| <i>EPI_ISL_931185</i> |
| <i>EPI_ISL_931186</i> |
| <i>EPI_ISL_931187</i> |
| <i>EPI_ISL_931201</i> |
| <i>EPI_ISL_931189</i> |
| <i>EPI_ISL_931190</i> |
| <i>EPI_ISL_931202</i> |
| <i>EPI_ISL_931191</i> |
| <i>EPI_ISL_931192</i> |
| <i>EPI_ISL_931193</i> |
| <i>EPI_ISL_931203</i> |
| <i>EPI_ISL_931194</i> |

|                       |
|-----------------------|
| <i>EPI_ISL_931195</i> |
| <i>EPI_ISL_931204</i> |
| <i>EPI_ISL_931205</i> |
| <i>EPI_ISL_931206</i> |
| <i>EPI_ISL_931197</i> |
| <i>EPI_ISL_931208</i> |
| <i>EPI_ISL_931209</i> |
| <i>EPI_ISL_931210</i> |
| <i>EPI_ISL_931211</i> |
| <i>EPI_ISL_931212</i> |
| <i>EPI_ISL_931213</i> |
| <i>EPI_ISL_931214</i> |
| <i>EPI_ISL_931215</i> |
| <i>EPI_ISL_931216</i> |
| <i>EPI_ISL_931217</i> |
| <i>EPI_ISL_931218</i> |
| <i>EPI_ISL_931219</i> |
| <i>EPI_ISL_931220</i> |
| <i>EPI_ISL_931221</i> |

|                       |
|-----------------------|
| <i>EPI_ISL_931222</i> |
| <i>EPI_ISL_931223</i> |
| <i>EPI_ISL_931224</i> |
| <i>EPI_ISL_931225</i> |
| <i>EPI_ISL_931226</i> |
| <i>EPI_ISL_931227</i> |
| <i>EPI_ISL_931228</i> |
| <i>EPI_ISL_931229</i> |
| <i>EPI_ISL_931230</i> |
| <i>EPI_ISL_931231</i> |
| <i>EPI_ISL_931232</i> |
| <i>EPI_ISL_931233</i> |
| <i>EPI_ISL_931246</i> |
| <i>EPI_ISL_931234</i> |
| <i>EPI_ISL_931235</i> |
| <i>EPI_ISL_931236</i> |
| <i>EPI_ISL_931247</i> |
| <i>EPI_ISL_931248</i> |
| <i>EPI_ISL_931249</i> |

|                       |
|-----------------------|
| <i>EPI_ISL_931251</i> |
| <i>EPI_ISL_931253</i> |
| <i>EPI_ISL_931254</i> |
| <i>EPI_ISL_931256</i> |
| <i>EPI_ISL_931257</i> |
| <i>EPI_ISL_931258</i> |
| <i>EPI_ISL_931259</i> |
| <i>EPI_ISL_931261</i> |
| <i>EPI_ISL_931262</i> |
| <i>EPI_ISL_931263</i> |
| <i>EPI_ISL_931264</i> |
| <i>EPI_ISL_931265</i> |
| <i>EPI_ISL_931267</i> |
| <i>EPI_ISL_931268</i> |
| <i>EPI_ISL_931269</i> |
| <i>EPI_ISL_931270</i> |
| <i>EPI_ISL_931272</i> |
| <i>EPI_ISL_931273</i> |
| <i>EPI_ISL_931274</i> |

|                       |
|-----------------------|
| <i>EPI_ISL_931276</i> |
| <i>EPI_ISL_931279</i> |
| <i>EPI_ISL_931280</i> |
| <i>EPI_ISL_931281</i> |
| <i>EPI_ISL_931284</i> |
| <i>EPI_ISL_931285</i> |
| <i>EPI_ISL_931286</i> |
| <i>EPI_ISL_931287</i> |
| <i>EPI_ISL_931288</i> |
| <i>EPI_ISL_931289</i> |
| <i>EPI_ISL_931290</i> |
| <i>EPI_ISL_931291</i> |
| <i>EPI_ISL_931292</i> |
| <i>EPI_ISL_931293</i> |
| <i>EPI_ISL_931294</i> |
| <i>EPI_ISL_931295</i> |
| <i>EPI_ISL_931296</i> |
| <i>EPI_ISL_931297</i> |
| <i>EPI_ISL_931301</i> |



|                       |
|-----------------------|
| <i>EPI_ISL_931302</i> |
| <i>EPI_ISL_931303</i> |
| <i>EPI_ISL_931305</i> |
| <i>EPI_ISL_931306</i> |
| <i>EPI_ISL_931307</i> |
| <i>EPI_ISL_931309</i> |
| <i>EPI_ISL_931310</i> |
| <i>EPI_ISL_931312</i> |
| <i>EPI_ISL_931313</i> |
| <i>EPI_ISL_931376</i> |
| <i>EPI_ISL_931314</i> |
| <i>EPI_ISL_931400</i> |
| <i>EPI_ISL_931379</i> |
| <i>EPI_ISL_931315</i> |
| <i>EPI_ISL_931316</i> |
| <i>EPI_ISL_931381</i> |
| <i>EPI_ISL_931319</i> |
| <i>EPI_ISL_931320</i> |
| <i>EPI_ISL_931321</i> |

|                       |
|-----------------------|
| <i>EPI_ISL_931322</i> |
| <i>EPI_ISL_931324</i> |
| <i>EPI_ISL_931327</i> |
| <i>EPI_ISL_931328</i> |
| <i>EPI_ISL_931382</i> |
| <i>EPI_ISL_931329</i> |
| <i>EPI_ISL_931330</i> |
| <i>EPI_ISL_931331</i> |
| <i>EPI_ISL_931333</i> |
| <i>EPI_ISL_931335</i> |
| <i>EPI_ISL_931336</i> |
| <i>EPI_ISL_931383</i> |
| <i>EPI_ISL_931384</i> |
| <i>EPI_ISL_931338</i> |
| <i>EPI_ISL_931339</i> |
| <i>EPI_ISL_931386</i> |
| <i>EPI_ISL_931387</i> |
| <i>EPI_ISL_931388</i> |
| <i>EPI_ISL_931402</i> |

|                       |
|-----------------------|
| <i>EPI_ISL_931403</i> |
| <i>EPI_ISL_931404</i> |
| <i>EPI_ISL_931405</i> |
| <i>EPI_ISL_931406</i> |
| <i>EPI_ISL_931408</i> |
| <i>EPI_ISL_931409</i> |
| <i>EPI_ISL_931411</i> |
| <i>EPI_ISL_931412</i> |
| <i>EPI_ISL_931413</i> |
| <i>EPI_ISL_931414</i> |
| <i>EPI_ISL_931415</i> |
| <i>EPI_ISL_931416</i> |
| <i>EPI_ISL_931417</i> |
| <i>EPI_ISL_931418</i> |
| <i>EPI_ISL_931419</i> |
| <i>EPI_ISL_931423</i> |
| <i>EPI_ISL_931425</i> |
| <i>EPI_ISL_931426</i> |
| <i>EPI_ISL_931430</i> |

|                        |
|------------------------|
| <i>EPI_ISL_931431</i>  |
| <i>EPI_ISL_931432</i>  |
| <i>EPI_ISL_931435</i>  |
| <i>EPI_ISL_931444</i>  |
| <i>EPI_ISL_931446</i>  |
| <i>EPI_ISL_931447</i>  |
| <i>EPI_ISL_931072</i>  |
| <i>EPI_ISL_931073</i>  |
| <i>EPI_ISL_931075</i>  |
| <i>EPI_ISL_931076</i>  |
| <i>EPI_ISL_931077</i>  |
| <i>EPI_ISL_931078</i>  |
| <i>EPI_ISL_931342</i>  |
| <i>EPI_ISL_931081</i>  |
| <i>EPI_ISL_2610978</i> |
| <i>EPI_ISL_2610979</i> |
| <i>EPI_ISL_2610980</i> |
| <i>EPI_ISL_2610982</i> |
| <i>EPI_ISL_2610983</i> |

|                        |
|------------------------|
| <i>EPI_ISL_2610985</i> |
| <i>EPI_ISL_2610986</i> |
| <i>EPI_ISL_2610987</i> |
| <i>EPI_ISL_2610989</i> |
| <i>EPI_ISL_931343</i>  |
| <i>EPI_ISL_931344</i>  |
| <i>EPI_ISL_931345</i>  |
| <i>EPI_ISL_931346</i>  |
| <i>EPI_ISL_931347</i>  |
| <i>EPI_ISL_931348</i>  |
| <i>EPI_ISL_931350</i>  |
| <i>EPI_ISL_931351</i>  |
| <i>EPI_ISL_931352</i>  |
| <i>EPI_ISL_931353</i>  |
| <i>EPI_ISL_931354</i>  |
| <i>EPI_ISL_931355</i>  |
| <i>EPI_ISL_931356</i>  |
| <i>EPI_ISL_931357</i>  |
| <i>EPI_ISL_931358</i>  |

|                        |
|------------------------|
| <i>EPI_ISL_931359</i>  |
| <i>EPI_ISL_1273465</i> |
| <i>EPI_ISL_931361</i>  |
| <i>EPI_ISL_931362</i>  |
| <i>EPI_ISL_931389</i>  |
| <i>EPI_ISL_1273466</i> |
| <i>EPI_ISL_931363</i>  |
| <i>EPI_ISL_1273469</i> |
| <i>EPI_ISL_1273470</i> |
| <i>EPI_ISL_1273471</i> |
| <i>EPI_ISL_1273472</i> |
| <i>EPI_ISL_1273675</i> |
| <i>EPI_ISL_1273473</i> |
| <i>EPI_ISL_1273474</i> |
| <i>EPI_ISL_931364</i>  |
| <i>EPI_ISL_2611007</i> |
| <i>EPI_ISL_2611009</i> |
| <i>EPI_ISL_2611010</i> |
| <i>EPI_ISL_2611011</i> |

|                        |
|------------------------|
| <i>EPI_ISL_1273464</i> |
| <i>EPI_ISL_1273676</i> |
| <i>EPI_ISL_2611014</i> |
| <i>EPI_ISL_2611015</i> |
| <i>EPI_ISL_2611016</i> |
| <i>EPI_ISL_1273710</i> |
| <i>EPI_ISL_1273480</i> |
| <i>EPI_ISL_1273481</i> |
| <i>EPI_ISL_1273482</i> |
| <i>EPI_ISL_931366</i>  |
| <i>EPI_ISL_2367210</i> |
| <i>EPI_ISL_2367211</i> |
| <i>EPI_ISL_1273483</i> |
| <i>EPI_ISL_2610946</i> |
| <i>EPI_ISL_2610947</i> |
| <i>EPI_ISL_2610948</i> |
| <i>EPI_ISL_2610949</i> |
| <i>EPI_ISL_931368</i>  |
| <i>EPI_ISL_931369</i>  |

|                        |
|------------------------|
| <i>EPI_ISL_2610951</i> |
| <i>EPI_ISL_1273485</i> |
| <i>EPI_ISL_1273486</i> |
| <i>EPI_ISL_1273740</i> |
| <i>EPI_ISL_1273711</i> |
| <i>EPI_ISL_1273487</i> |
| <i>EPI_ISL_1273488</i> |
| <i>EPI_ISL_1273489</i> |
| <i>EPI_ISL_2367214</i> |
| <i>EPI_ISL_2367215</i> |
| <i>EPI_ISL_2367216</i> |
| <i>EPI_ISL_1747647</i> |
| <i>EPI_ISL_931448</i>  |
| <i>EPI_ISL_2408423</i> |
| <i>EPI_ISL_1273741</i> |
| <i>EPI_ISL_1273742</i> |
| <i>EPI_ISL_1273491</i> |
| <i>EPI_ISL_1273712</i> |
| <i>EPI_ISL_1273492</i> |

|                        |
|------------------------|
| <i>EPI_ISL_1273493</i> |
| <i>EPI_ISL_1273494</i> |
| <i>EPI_ISL_1273708</i> |
| <i>EPI_ISL_1296819</i> |
| <i>EPI_ISL_1273495</i> |
| <i>EPI_ISL_1273496</i> |
| <i>EPI_ISL_1273497</i> |
| <i>EPI_ISL_1273498</i> |
| <i>EPI_ISL_1273499</i> |
| <i>EPI_ISL_1273500</i> |
| <i>EPI_ISL_1273501</i> |
| <i>EPI_ISL_1273503</i> |
| <i>EPI_ISL_1273504</i> |
| <i>EPI_ISL_1273505</i> |
| <i>EPI_ISL_1273506</i> |
| <i>EPI_ISL_1273507</i> |
| <i>EPI_ISL_1273508</i> |
| <i>EPI_ISL_1273509</i> |
| <i>EPI_ISL_1273510</i> |

|                        |
|------------------------|
| <i>EPI_ISL_1273511</i> |
| <i>EPI_ISL_1273512</i> |
| <i>EPI_ISL_1273513</i> |
| <i>EPI_ISL_1273743</i> |
| <i>EPI_ISL_1273744</i> |
| <i>EPI_ISL_1273514</i> |
| <i>EPI_ISL_1273518</i> |
| <i>EPI_ISL_1273519</i> |
| <i>EPI_ISL_1273520</i> |
| <i>EPI_ISL_1273521</i> |
| <i>EPI_ISL_1273522</i> |
| <i>EPI_ISL_1273523</i> |
| <i>EPI_ISL_1273524</i> |
| <i>EPI_ISL_1273525</i> |
| <i>EPI_ISL_1273526</i> |
| <i>EPI_ISL_1273527</i> |
| <i>EPI_ISL_1273528</i> |
| <i>EPI_ISL_1273745</i> |
| <i>EPI_ISL_1273529</i> |

|                        |
|------------------------|
| <i>EPI_ISL_1273746</i> |
| <i>EPI_ISL_1273530</i> |
| <i>EPI_ISL_1273531</i> |
| <i>EPI_ISL_1273532</i> |
| <i>EPI_ISL_1273533</i> |
| <i>EPI_ISL_1273534</i> |
| <i>EPI_ISL_1273535</i> |
| <i>EPI_ISL_1273536</i> |
| <i>EPI_ISL_1273537</i> |
| <i>EPI_ISL_1273538</i> |
| <i>EPI_ISL_1273539</i> |
| <i>EPI_ISL_2180924</i> |
| <i>EPI_ISL_1273540</i> |
| <i>EPI_ISL_1273541</i> |
| <i>EPI_ISL_1273542</i> |
| <i>EPI_ISL_1273543</i> |
| <i>EPI_ISL_1273544</i> |
| <i>EPI_ISL_1273545</i> |
| <i>EPI_ISL_1273546</i> |

|                        |
|------------------------|
| <i>EPI_ISL_1273747</i> |
| <i>EPI_ISL_1273748</i> |
| <i>EPI_ISL_1273547</i> |
| <i>EPI_ISL_1273548</i> |
| <i>EPI_ISL_1273549</i> |
| <i>EPI_ISL_1273550</i> |
| <i>EPI_ISL_1273764</i> |
| <i>EPI_ISL_1273720</i> |
| <i>EPI_ISL_1273551</i> |
| <i>EPI_ISL_1273552</i> |
| <i>EPI_ISL_1273703</i> |
| <i>EPI_ISL_1273553</i> |
| <i>EPI_ISL_1273554</i> |
| <i>EPI_ISL_1296821</i> |
| <i>EPI_ISL_1273749</i> |
| <i>EPI_ISL_1273555</i> |
| <i>EPI_ISL_1273556</i> |
| <i>EPI_ISL_1273557</i> |
| <i>EPI_ISL_1273558</i> |

|                        |
|------------------------|
| <i>EPI_ISL_1273559</i> |
| <i>EPI_ISL_2941526</i> |
| <i>EPI_ISL_2941527</i> |
| <i>EPI_ISL_3040150</i> |
| <i>EPI_ISL_2941528</i> |
| <i>EPI_ISL_2941531</i> |
| <i>EPI_ISL_3086259</i> |
| <i>EPI_ISL_3530748</i> |
| <i>EPI_ISL_3425783</i> |
| <i>EPI_ISL_3425784</i> |
| <i>EPI_ISL_3425785</i> |
| <i>EPI_ISL_3030091</i> |
| <i>EPI_ISL_3425787</i> |
| <i>EPI_ISL_3030092</i> |
| <i>EPI_ISL_3030093</i> |
| <i>EPI_ISL_3030094</i> |
| <i>EPI_ISL_3030095</i> |
| <i>EPI_ISL_3030096</i> |
| <i>EPI_ISL_3030097</i> |

|                        |
|------------------------|
| <i>EPI_ISL_3030098</i> |
| <i>EPI_ISL_3030100</i> |
| <i>EPI_ISL_3030101</i> |
| <i>EPI_ISL_3086262</i> |
| <i>EPI_ISL_2367218</i> |
| <i>EPI_ISL_2367219</i> |
| <i>EPI_ISL_1273560</i> |
| <i>EPI_ISL_1273561</i> |
| <i>EPI_ISL_1273562</i> |
| <i>EPI_ISL_1273563</i> |
| <i>EPI_ISL_1273564</i> |
| <i>EPI_ISL_1273565</i> |
| <i>EPI_ISL_1273566</i> |
| <i>EPI_ISL_2180927</i> |
| <i>EPI_ISL_1273567</i> |
| <i>EPI_ISL_1273568</i> |
| <i>EPI_ISL_1273569</i> |
| <i>EPI_ISL_1273570</i> |
| <i>EPI_ISL_1273571</i> |

|                        |
|------------------------|
| <i>EPI_ISL_1273572</i> |
| <i>EPI_ISL_1296822</i> |
| <i>EPI_ISL_1273573</i> |
| <i>EPI_ISL_1273574</i> |
| <i>EPI_ISL_1273575</i> |
| <i>EPI_ISL_1273576</i> |
| <i>EPI_ISL_2521383</i> |
| <i>EPI_ISL_1273577</i> |
| <i>EPI_ISL_1273578</i> |
| <i>EPI_ISL_2180929</i> |
| <i>EPI_ISL_1273579</i> |
| <i>EPI_ISL_1273580</i> |
| <i>EPI_ISL_1273750</i> |
| <i>EPI_ISL_1273581</i> |
| <i>EPI_ISL_1273582</i> |
| <i>EPI_ISL_1273583</i> |
| <i>EPI_ISL_1273584</i> |
| <i>EPI_ISL_1273585</i> |
| <i>EPI_ISL_1273586</i> |

|                        |
|------------------------|
| <i>EPI_ISL_1273587</i> |
| <i>EPI_ISL_1273588</i> |
| <i>EPI_ISL_1296824</i> |
| <i>EPI_ISL_1273589</i> |
| <i>EPI_ISL_1273590</i> |
| <i>EPI_ISL_1273728</i> |
| <i>EPI_ISL_1273591</i> |
| <i>EPI_ISL_1273592</i> |
| <i>EPI_ISL_1273593</i> |
| <i>EPI_ISL_1273751</i> |
| <i>EPI_ISL_1273762</i> |
| <i>EPI_ISL_1273763</i> |
| <i>EPI_ISL_1273594</i> |
| <i>EPI_ISL_1273595</i> |
| <i>EPI_ISL_1296825</i> |
| <i>EPI_ISL_1273596</i> |
| <i>EPI_ISL_1273752</i> |
| <i>EPI_ISL_1273597</i> |
| <i>EPI_ISL_2408424</i> |

|                        |
|------------------------|
| <i>EPI_ISL_2408425</i> |
| <i>EPI_ISL_1296826</i> |
| <i>EPI_ISL_1273598</i> |
| <i>EPI_ISL_1273599</i> |
| <i>EPI_ISL_1296828</i> |
| <i>EPI_ISL_1273600</i> |
| <i>EPI_ISL_1273601</i> |
| <i>EPI_ISL_1273602</i> |
| <i>EPI_ISL_1273603</i> |
| <i>EPI_ISL_1273604</i> |
| <i>EPI_ISL_1273605</i> |
| <i>EPI_ISL_1273606</i> |
| <i>EPI_ISL_1273607</i> |
| <i>EPI_ISL_1273608</i> |
| <i>EPI_ISL_1296829</i> |
| <i>EPI_ISL_1993811</i> |
| <i>EPI_ISL_1296830</i> |
| <i>EPI_ISL_1273610</i> |
| <i>EPI_ISL_1273611</i> |

|                        |
|------------------------|
| <i>EPI_ISL_1273612</i> |
| <i>EPI_ISL_1273613</i> |
| <i>EPI_ISL_1993812</i> |
| <i>EPI_ISL_1273765</i> |
| <i>EPI_ISL_1273766</i> |
| <i>EPI_ISL_1296832</i> |
| <i>EPI_ISL_1273753</i> |
| <i>EPI_ISL_1273768</i> |
| <i>EPI_ISL_1273614</i> |
| <i>EPI_ISL_1273615</i> |
| <i>EPI_ISL_1273616</i> |
| <i>EPI_ISL_1273617</i> |
| <i>EPI_ISL_1273618</i> |
| <i>EPI_ISL_1296833</i> |
| <i>EPI_ISL_1273619</i> |
| <i>EPI_ISL_1273715</i> |
| <i>EPI_ISL_1273756</i> |
| <i>EPI_ISL_1273620</i> |
| <i>EPI_ISL_1296834</i> |

|                        |
|------------------------|
| <i>EPI_ISL_1273622</i> |
| <i>EPI_ISL_1273623</i> |
| <i>EPI_ISL_1273624</i> |
| <i>EPI_ISL_1273625</i> |
| <i>EPI_ISL_1273626</i> |
| <i>EPI_ISL_1273627</i> |
| <i>EPI_ISL_1273628</i> |
| <i>EPI_ISL_1273629</i> |
| <i>EPI_ISL_1273630</i> |
| <i>EPI_ISL_1014698</i> |
| <i>EPI_ISL_1014701</i> |
| <i>EPI_ISL_1273632</i> |
| <i>EPI_ISL_1273633</i> |
| <i>EPI_ISL_1273634</i> |
| <i>EPI_ISL_1296836</i> |
| <i>EPI_ISL_1273635</i> |
| <i>EPI_ISL_1273636</i> |
| <i>EPI_ISL_1273637</i> |
| <i>EPI_ISL_1273638</i> |

|                        |
|------------------------|
| <i>EPI_ISL_1273639</i> |
| <i>EPI_ISL_1273640</i> |
| <i>EPI_ISL_1273709</i> |
| <i>EPI_ISL_1273641</i> |
| <i>EPI_ISL_1273642</i> |
| <i>EPI_ISL_1273643</i> |
| <i>EPI_ISL_1273644</i> |
| <i>EPI_ISL_1273645</i> |
| <i>EPI_ISL_1273646</i> |
| <i>EPI_ISL_1273647</i> |
| <i>EPI_ISL_1273648</i> |
| <i>EPI_ISL_1273649</i> |
| <i>EPI_ISL_1273654</i> |
| <i>EPI_ISL_1273655</i> |
| <i>EPI_ISL_1273656</i> |
| <i>EPI_ISL_1296837</i> |
| <i>EPI_ISL_1296838</i> |
| <i>EPI_ISL_1273657</i> |
| <i>EPI_ISL_1273658</i> |

|                        |
|------------------------|
| <i>EPI_ISL_1273659</i> |
| <i>EPI_ISL_1273660</i> |
| <i>EPI_ISL_1296841</i> |
| <i>EPI_ISL_1273661</i> |
| <i>EPI_ISL_1273662</i> |
| <i>EPI_ISL_1273665</i> |
| <i>EPI_ISL_1273666</i> |
| <i>EPI_ISL_1273667</i> |
| <i>EPI_ISL_1273668</i> |
| <i>EPI_ISL_1273757</i> |
| <i>EPI_ISL_1273669</i> |
| <i>EPI_ISL_1273670</i> |
| <i>EPI_ISL_1014699</i> |
| <i>EPI_ISL_1014702</i> |
| <i>EPI_ISL_1014697</i> |
| <i>EPI_ISL_2466552</i> |
| <i>EPI_ISL_2466555</i> |
| <i>EPI_ISL_2466560</i> |
| <i>EPI_ISL_2466561</i> |

|                        |
|------------------------|
| <i>EPI_ISL_2484511</i> |
| <i>EPI_ISL_2484388</i> |
| <i>EPI_ISL_2484289</i> |
| <i>EPI_ISL_2484279</i> |
| <i>EPI_ISL_2484312</i> |
| <i>EPI_ISL_2484281</i> |
| <i>EPI_ISL_2484287</i> |
| <i>EPI_ISL_2484374</i> |
| <i>EPI_ISL_2484316</i> |
| <i>EPI_ISL_2484488</i> |
| <i>EPI_ISL_2484232</i> |
| <i>EPI_ISL_2484341</i> |
| <i>EPI_ISL_2484240</i> |
| <i>EPI_ISL_2484348</i> |
| <i>EPI_ISL_2484513</i> |
| <i>EPI_ISL_2611018</i> |
| <i>EPI_ISL_2611019</i> |
| <i>EPI_ISL_2611020</i> |
| <i>EPI_ISL_2611021</i> |

|                        |
|------------------------|
| <i>EPI_ISL_2611022</i> |
| <i>EPI_ISL_2611023</i> |
| <i>EPI_ISL_2611024</i> |
| <i>EPI_ISL_2608292</i> |
| <i>EPI_ISL_2611025</i> |
| <i>EPI_ISL_2608293</i> |
| <i>EPI_ISL_2608294</i> |
| <i>EPI_ISL_2521386</i> |
| <i>EPI_ISL_2521388</i> |
| <i>EPI_ISL_2608295</i> |
| <i>EPI_ISL_2608296</i> |
| <i>EPI_ISL_2608297</i> |
| <i>EPI_ISL_2608298</i> |
| <i>EPI_ISL_2608299</i> |
| <i>EPI_ISL_2608300</i> |
| <i>EPI_ISL_1993813</i> |
| <i>EPI_ISL_1993814</i> |
| <i>EPI_ISL_1993815</i> |
| <i>EPI_ISL_1993816</i> |

|                        |
|------------------------|
| <i>EPI_ISL_1993817</i> |
| <i>EPI_ISL_1993818</i> |
| <i>EPI_ISL_1993819</i> |
| <i>EPI_ISL_1993820</i> |
| <i>EPI_ISL_1993823</i> |
| <i>EPI_ISL_1993824</i> |
| <i>EPI_ISL_1993825</i> |
| <i>EPI_ISL_1993826</i> |
| <i>EPI_ISL_1993827</i> |
| <i>EPI_ISL_1993830</i> |
| <i>EPI_ISL_1993831</i> |
| <i>EPI_ISL_1993876</i> |
| <i>EPI_ISL_1993877</i> |
| <i>EPI_ISL_1993879</i> |
| <i>EPI_ISL_1993880</i> |
| <i>EPI_ISL_1993882</i> |
| <i>EPI_ISL_1914605</i> |
| <i>EPI_ISL_1914606</i> |
| <i>EPI_ISL_1747689</i> |



|                        |
|------------------------|
| <i>EPI_ISL_1747772</i> |
| <i>EPI_ISL_1747661</i> |
| <i>EPI_ISL_1747725</i> |
| <i>EPI_ISL_1747993</i> |
| <i>EPI_ISL_1747833</i> |
| <i>EPI_ISL_1747926</i> |
| <i>EPI_ISL_1748194</i> |
| <i>EPI_ISL_1747709</i> |
| <i>EPI_ISL_1747960</i> |
| <i>EPI_ISL_1747665</i> |
| <i>EPI_ISL_1747662</i> |
| <i>EPI_ISL_1747784</i> |
| <i>EPI_ISL_1747684</i> |
| <i>EPI_ISL_1747756</i> |
| <i>EPI_ISL_1747658</i> |
| <i>EPI_ISL_1747776</i> |
| <i>EPI_ISL_1747714</i> |
| <i>EPI_ISL_1747740</i> |
| <i>EPI_ISL_2484250</i> |

|                        |
|------------------------|
| <i>EPI_ISL_2484375</i> |
| <i>EPI_ISL_1747651</i> |
| <i>EPI_ISL_1747645</i> |
| <i>EPI_ISL_1747635</i> |
| <i>EPI_ISL_1747631</i> |
| <i>EPI_ISL_1747638</i> |
| <i>EPI_ISL_1747637</i> |
| <i>EPI_ISL_1747621</i> |
| <i>EPI_ISL_1747642</i> |
| <i>EPI_ISL_2484397</i> |
| <i>EPI_ISL_2484275</i> |
| <i>EPI_ISL_2484517</i> |
| <i>EPI_ISL_2484370</i> |
| <i>EPI_ISL_1747628</i> |
| <i>EPI_ISL_1747649</i> |
| <i>EPI_ISL_1747646</i> |
| <i>EPI_ISL_1747629</i> |
| <i>EPI_ISL_1747650</i> |
| <i>EPI_ISL_2484439</i> |

|                        |
|------------------------|
| <i>EPI_ISL_1747619</i> |
| <i>EPI_ISL_2484507</i> |
| <i>EPI_ISL_2484408</i> |
| <i>EPI_ISL_2484317</i> |
| <i>EPI_ISL_2484469</i> |
| <i>EPI_ISL_2484352</i> |
| <i>EPI_ISL_2484349</i> |
| <i>EPI_ISL_2484416</i> |
| <i>EPI_ISL_2484308</i> |
| <i>EPI_ISL_2484487</i> |
| <i>EPI_ISL_2484252</i> |
| <i>EPI_ISL_2484504</i> |
| <i>EPI_ISL_2484336</i> |
| <i>EPI_ISL_2484347</i> |
| <i>EPI_ISL_2484339</i> |
| <i>EPI_ISL_2484360</i> |
| <i>EPI_ISL_2484514</i> |
| <i>EPI_ISL_2484266</i> |
| <i>EPI_ISL_2484268</i> |

|                        |
|------------------------|
| <i>EPI_ISL_2484342</i> |
| <i>EPI_ISL_2484415</i> |
| <i>EPI_ISL_2484315</i> |
| <i>EPI_ISL_2484391</i> |
| <i>EPI_ISL_2484277</i> |
| <i>EPI_ISL_2484366</i> |
| <i>EPI_ISL_2484321</i> |
| <i>EPI_ISL_2484454</i> |
| <i>EPI_ISL_2484313</i> |
| <i>EPI_ISL_2102071</i> |
| <i>EPI_ISL_2484390</i> |
| <i>EPI_ISL_2521391</i> |
| <i>EPI_ISL_2521392</i> |
| <i>EPI_ISL_2521393</i> |
| <i>EPI_ISL_2521394</i> |
| <i>EPI_ISL_2521395</i> |
| <i>EPI_ISL_2521396</i> |
| <i>EPI_ISL_2102073</i> |
| <i>EPI_ISL_2521397</i> |

|                        |
|------------------------|
| <i>EPI_ISL_2102074</i> |
| <i>EPI_ISL_2102076</i> |
| <i>EPI_ISL_2102077</i> |
| <i>EPI_ISL_2102078</i> |
| <i>EPI_ISL_2102079</i> |
| <i>EPI_ISL_2102080</i> |
| <i>EPI_ISL_2102081</i> |
| <i>EPI_ISL_2102082</i> |
| <i>EPI_ISL_2102083</i> |
| <i>EPI_ISL_2102084</i> |
| <i>EPI_ISL_2102085</i> |
| <i>EPI_ISL_2102087</i> |
| <i>EPI_ISL_2102088</i> |
| <i>EPI_ISL_2180931</i> |
| <i>EPI_ISL_2102089</i> |
| <i>EPI_ISL_2180932</i> |
| <i>EPI_ISL_2180934</i> |
| <i>EPI_ISL_2180935</i> |
| <i>EPI_ISL_2180937</i> |

|                        |
|------------------------|
| <i>EPI_ISL_2180940</i> |
| <i>EPI_ISL_2180942</i> |
| <i>EPI_ISL_1747625</i> |
| <i>EPI_ISL_1747814</i> |
| <i>EPI_ISL_1747853</i> |
| <i>EPI_ISL_1747826</i> |
| <i>EPI_ISL_1747899</i> |
| <i>EPI_ISL_1747892</i> |
| <i>EPI_ISL_1747641</i> |
| <i>EPI_ISL_1747622</i> |
| <i>EPI_ISL_1747636</i> |
| <i>EPI_ISL_1748287</i> |
| <i>EPI_ISL_1748278</i> |
| <i>EPI_ISL_1748256</i> |
| <i>EPI_ISL_1748266</i> |
| <i>EPI_ISL_1748319</i> |
| <i>EPI_ISL_1748302</i> |
| <i>EPI_ISL_1748310</i> |
| <i>EPI_ISL_1748269</i> |

|                        |
|------------------------|
| <i>EPI_ISL_1748026</i> |
| <i>EPI_ISL_1747998</i> |
| <i>EPI_ISL_1748002</i> |
| <i>EPI_ISL_1748042</i> |
| <i>EPI_ISL_1748137</i> |
| <i>EPI_ISL_1748080</i> |
| <i>EPI_ISL_1748037</i> |
| <i>EPI_ISL_1748088</i> |
| <i>EPI_ISL_1748164</i> |
| <i>EPI_ISL_1748060</i> |
| <i>EPI_ISL_1747995</i> |
| <i>EPI_ISL_1748366</i> |
| <i>EPI_ISL_1748351</i> |
| <i>EPI_ISL_1748338</i> |
| <i>EPI_ISL_1748419</i> |
| <i>EPI_ISL_1748387</i> |
| <i>EPI_ISL_1748412</i> |
| <i>EPI_ISL_1748359</i> |
| <i>EPI_ISL_1748343</i> |

|                        |
|------------------------|
| <i>EPI_ISL_1748409</i> |
| <i>EPI_ISL_1748364</i> |
| <i>EPI_ISL_1748336</i> |
| <i>EPI_ISL_1748382</i> |
| <i>EPI_ISL_1748384</i> |
| <i>EPI_ISL_1748368</i> |
| <i>EPI_ISL_1748348</i> |
| <i>EPI_ISL_1748371</i> |
| <i>EPI_ISL_1748362</i> |
| <i>EPI_ISL_1748353</i> |
| <i>EPI_ISL_1748395</i> |
| <i>EPI_ISL_1748332</i> |
| <i>EPI_ISL_1748483</i> |
| <i>EPI_ISL_1748490</i> |
| <i>EPI_ISL_1748430</i> |
| <i>EPI_ISL_1748493</i> |
| <i>EPI_ISL_1748468</i> |
| <i>EPI_ISL_1748452</i> |
| <i>EPI_ISL_1748378</i> |

|                        |
|------------------------|
| <i>EPI_ISL_1748341</i> |
| <i>EPI_ISL_1748391</i> |
| <i>EPI_ISL_1748437</i> |
| <i>EPI_ISL_1748495</i> |
| <i>EPI_ISL_1748441</i> |
| <i>EPI_ISL_1748474</i> |
| <i>EPI_ISL_1748459</i> |
| <i>EPI_ISL_1748422</i> |
| <i>EPI_ISL_1748427</i> |
| <i>EPI_ISL_1748486</i> |
| <i>EPI_ISL_1748649</i> |
| <i>EPI_ISL_1748527</i> |
| <i>EPI_ISL_1748660</i> |
| <i>EPI_ISL_1748509</i> |
| <i>EPI_ISL_1748677</i> |
| <i>EPI_ISL_1748570</i> |
| <i>EPI_ISL_1748642</i> |
| <i>EPI_ISL_1748587</i> |
| <i>EPI_ISL_1748725</i> |

|                        |
|------------------------|
| <i>EPI_ISL_1748614</i> |
| <i>EPI_ISL_1748694</i> |
| <i>EPI_ISL_1748732</i> |
| <i>EPI_ISL_1748543</i> |
| <i>EPI_ISL_1748522</i> |
| <i>EPI_ISL_1748604</i> |
| <i>EPI_ISL_1748644</i> |
| <i>EPI_ISL_1748668</i> |
| <i>EPI_ISL_1748685</i> |
| <i>EPI_ISL_1748568</i> |
| <i>EPI_ISL_1748640</i> |
| <i>EPI_ISL_1748516</i> |
| <i>EPI_ISL_1748618</i> |
| <i>EPI_ISL_1748734</i> |
| <i>EPI_ISL_1748730</i> |
| <i>EPI_ISL_1748714</i> |
| <i>EPI_ISL_1748539</i> |
| <i>EPI_ISL_1748681</i> |
| <i>EPI_ISL_1748655</i> |

|                        |
|------------------------|
| <i>EPI_ISL_1748534</i> |
| <i>EPI_ISL_1748703</i> |
| <i>EPI_ISL_1748673</i> |
| <i>EPI_ISL_1748634</i> |
| <i>EPI_ISL_1748580</i> |
| <i>EPI_ISL_1748563</i> |
| <i>EPI_ISL_1748518</i> |
| <i>EPI_ISL_1748711</i> |
| <i>EPI_ISL_1748647</i> |
| <i>EPI_ISL_1747859</i> |
| <i>EPI_ISL_1748499</i> |
| <i>EPI_ISL_1748463</i> |
| <i>EPI_ISL_1833641</i> |
| <i>EPI_ISL_1833649</i> |
| <i>EPI_ISL_1833652</i> |
| <i>EPI_ISL_1833656</i> |
| <i>EPI_ISL_1833661</i> |
| <i>EPI_ISL_1833663</i> |
| <i>EPI_ISL_1833668</i> |

|                        |
|------------------------|
| <i>EPI_ISL_1833673</i> |
| <i>EPI_ISL_1833676</i> |
| <i>EPI_ISL_1833679</i> |
| <i>EPI_ISL_1833682</i> |
| <i>EPI_ISL_1833684</i> |
| <i>EPI_ISL_1833687</i> |
| <i>EPI_ISL_1833690</i> |
| <i>EPI_ISL_1833692</i> |
| <i>EPI_ISL_1833695</i> |
| <i>EPI_ISL_1833698</i> |
| <i>EPI_ISL_1833701</i> |
| <i>EPI_ISL_1833704</i> |
| <i>EPI_ISL_1973557</i> |
| <i>EPI_ISL_1973558</i> |
| <i>EPI_ISL_1973559</i> |
| <i>EPI_ISL_1973562</i> |
| <i>EPI_ISL_1973563</i> |
| <i>EPI_ISL_1973564</i> |
| <i>EPI_ISL_1973565</i> |

|                        |
|------------------------|
| <i>EPI_ISL_1833709</i> |
| <i>EPI_ISL_1833711</i> |
| <i>EPI_ISL_1993832</i> |
| <i>EPI_ISL_1993833</i> |
| <i>EPI_ISL_1993883</i> |
| <i>EPI_ISL_1833714</i> |
| <i>EPI_ISL_1833718</i> |
| <i>EPI_ISL_1833721</i> |
| <i>EPI_ISL_1993884</i> |
| <i>EPI_ISL_1993885</i> |
| <i>EPI_ISL_1993886</i> |
| <i>EPI_ISL_1993887</i> |
| <i>EPI_ISL_1993888</i> |
| <i>EPI_ISL_1993890</i> |
| <i>EPI_ISL_1993891</i> |
| <i>EPI_ISL_1993892</i> |
| <i>EPI_ISL_1993893</i> |
| <i>EPI_ISL_1993834</i> |
| <i>EPI_ISL_1833726</i> |

|                        |
|------------------------|
| <i>EPI_ISL_1833729</i> |
| <i>EPI_ISL_1973566</i> |
| <i>EPI_ISL_1993835</i> |
| <i>EPI_ISL_1833731</i> |
| <i>EPI_ISL_1993894</i> |
| <i>EPI_ISL_1993895</i> |
| <i>EPI_ISL_1993836</i> |
| <i>EPI_ISL_1993896</i> |
| <i>EPI_ISL_1993897</i> |
| <i>EPI_ISL_1993837</i> |
| <i>EPI_ISL_1993898</i> |
| <i>EPI_ISL_1993899</i> |
| <i>EPI_ISL_1993838</i> |
| <i>EPI_ISL_1993900</i> |
| <i>EPI_ISL_1993901</i> |
| <i>EPI_ISL_1993902</i> |
| <i>EPI_ISL_1993904</i> |
| <i>EPI_ISL_1993839</i> |
| <i>EPI_ISL_2622118</i> |

|                        |
|------------------------|
| <i>EPI_ISL_2622119</i> |
| <i>EPI_ISL_2622120</i> |
| <i>EPI_ISL_1833741</i> |
| <i>EPI_ISL_2622121</i> |
| <i>EPI_ISL_2622122</i> |
| <i>EPI_ISL_2622123</i> |
| <i>EPI_ISL_2622124</i> |
| <i>EPI_ISL_2622125</i> |
| <i>EPI_ISL_1993906</i> |
| <i>EPI_ISL_2622126</i> |
| <i>EPI_ISL_2622127</i> |
| <i>EPI_ISL_2622128</i> |
| <i>EPI_ISL_2622129</i> |
| <i>EPI_ISL_2622130</i> |
| <i>EPI_ISL_2622131</i> |
| <i>EPI_ISL_1993840</i> |
| <i>EPI_ISL_2622132</i> |
| <i>EPI_ISL_1993908</i> |
| <i>EPI_ISL_1993841</i> |

|                        |
|------------------------|
| <i>EPI_ISL_1993842</i> |
| <i>EPI_ISL_1993843</i> |
| <i>EPI_ISL_1993844</i> |
| <i>EPI_ISL_1993845</i> |
| <i>EPI_ISL_1993846</i> |
| <i>EPI_ISL_1993847</i> |
| <i>EPI_ISL_1993909</i> |
| <i>EPI_ISL_1993848</i> |
| <i>EPI_ISL_1993849</i> |
| <i>EPI_ISL_1993850</i> |
| <i>EPI_ISL_1993910</i> |
| <i>EPI_ISL_1993912</i> |
| <i>EPI_ISL_1993913</i> |
| <i>EPI_ISL_1993851</i> |
| <i>EPI_ISL_1993852</i> |
| <i>EPI_ISL_1993914</i> |
| <i>EPI_ISL_1993915</i> |
| <i>EPI_ISL_1993853</i> |
| <i>EPI_ISL_1993916</i> |

|                        |
|------------------------|
| <i>EPI_ISL_1993854</i> |
| <i>EPI_ISL_1993855</i> |
| <i>EPI_ISL_1993856</i> |
| <i>EPI_ISL_1993857</i> |
| <i>EPI_ISL_1993859</i> |
| <i>EPI_ISL_1993860</i> |
| <i>EPI_ISL_2622133</i> |
| <i>EPI_ISL_1993917</i> |
| <i>EPI_ISL_1993918</i> |
| <i>EPI_ISL_2102091</i> |
| <i>EPI_ISL_2622134</i> |
| <i>EPI_ISL_2102092</i> |
| <i>EPI_ISL_2102093</i> |
| <i>EPI_ISL_2102094</i> |
| <i>EPI_ISL_2102095</i> |
| <i>EPI_ISL_2180946</i> |
| <i>EPI_ISL_2102096</i> |
| <i>EPI_ISL_2102097</i> |
| <i>EPI_ISL_2102099</i> |

|                        |
|------------------------|
| <i>EPI_ISL_2102100</i> |
| <i>EPI_ISL_2102101</i> |
| <i>EPI_ISL_2180947</i> |
| <i>EPI_ISL_2102102</i> |
| <i>EPI_ISL_2180949</i> |
| <i>EPI_ISL_2102103</i> |
| <i>EPI_ISL_2180950</i> |
| <i>EPI_ISL_2102104</i> |
| <i>EPI_ISL_2180952</i> |
| <i>EPI_ISL_2180954</i> |
| <i>EPI_ISL_2180955</i> |
| <i>EPI_ISL_2102105</i> |
| <i>EPI_ISL_2180957</i> |
| <i>EPI_ISL_2180959</i> |
| <i>EPI_ISL_2102106</i> |
| <i>EPI_ISL_2102108</i> |
| <i>EPI_ISL_2102109</i> |
| <i>EPI_ISL_2180960</i> |
| <i>EPI_ISL_2180962</i> |

|                        |
|------------------------|
| <i>EPI_ISL_2367220</i> |
| <i>EPI_ISL_2367221</i> |
| <i>EPI_ISL_2367223</i> |
| <i>EPI_ISL_2180963</i> |
| <i>EPI_ISL_2367224</i> |
| <i>EPI_ISL_2180965</i> |
| <i>EPI_ISL_2180967</i> |
| <i>EPI_ISL_2180968</i> |
| <i>EPI_ISL_2180970</i> |
| <i>EPI_ISL_2180972</i> |
| <i>EPI_ISL_2180973</i> |
| <i>EPI_ISL_2180975</i> |
| <i>EPI_ISL_2180977</i> |
| <i>EPI_ISL_2180978</i> |
| <i>EPI_ISL_2180980</i> |
| <i>EPI_ISL_2180981</i> |
| <i>EPI_ISL_2180983</i> |
| <i>EPI_ISL_2180985</i> |
| <i>EPI_ISL_2180986</i> |

|                        |
|------------------------|
| <i>EPI_ISL_2270038</i> |
| <i>EPI_ISL_2270040</i> |
| <i>EPI_ISL_2270041</i> |
| <i>EPI_ISL_2270043</i> |
| <i>EPI_ISL_2270045</i> |
| <i>EPI_ISL_2270046</i> |
| <i>EPI_ISL_2270048</i> |
| <i>EPI_ISL_2270049</i> |
| <i>EPI_ISL_2270051</i> |
| <i>EPI_ISL_2270053</i> |
| <i>EPI_ISL_2270054</i> |
| <i>EPI_ISL_2270057</i> |
| <i>EPI_ISL_2270059</i> |
| <i>EPI_ISL_2270060</i> |
| <i>EPI_ISL_2270062</i> |
| <i>EPI_ISL_2270064</i> |
| <i>EPI_ISL_2270065</i> |
| <i>EPI_ISL_2180990</i> |
| <i>EPI_ISL_2270068</i> |

|                        |
|------------------------|
| <i>EPI_ISL_2180992</i> |
| <i>EPI_ISL_2180994</i> |
| <i>EPI_ISL_2367225</i> |
| <i>EPI_ISL_2180995</i> |
| <i>EPI_ISL_2180997</i> |
| <i>EPI_ISL_2367226</i> |
| <i>EPI_ISL_2270112</i> |
| <i>EPI_ISL_2270113</i> |
| <i>EPI_ISL_2270115</i> |
| <i>EPI_ISL_2270117</i> |
| <i>EPI_ISL_2270118</i> |
| <i>EPI_ISL_2367227</i> |
| <i>EPI_ISL_2270120</i> |
| <i>EPI_ISL_2270121</i> |
| <i>EPI_ISL_2270123</i> |
| <i>EPI_ISL_2270125</i> |
| <i>EPI_ISL_2270126</i> |
| <i>EPI_ISL_2270128</i> |
| <i>EPI_ISL_2270129</i> |

|                        |
|------------------------|
| <i>EPI_ISL_2270131</i> |
| <i>EPI_ISL_2270133</i> |
| <i>EPI_ISL_2270134</i> |
| <i>EPI_ISL_2270136</i> |
| <i>EPI_ISL_2270137</i> |
| <i>EPI_ISL_2270139</i> |
| <i>EPI_ISL_2270141</i> |
| <i>EPI_ISL_2270142</i> |
| <i>EPI_ISL_2270144</i> |
| <i>EPI_ISL_2270145</i> |
| <i>EPI_ISL_2270147</i> |
| <i>EPI_ISL_2270149</i> |
| <i>EPI_ISL_2270150</i> |
| <i>EPI_ISL_2270152</i> |
| <i>EPI_ISL_2270153</i> |
| <i>EPI_ISL_2270155</i> |
| <i>EPI_ISL_2270157</i> |
| <i>EPI_ISL_2270070</i> |
| <i>EPI_ISL_2270077</i> |

|                        |
|------------------------|
| <i>EPI_ISL_2270079</i> |
| <i>EPI_ISL_2270081</i> |
| <i>EPI_ISL_2270084</i> |
| <i>EPI_ISL_2270165</i> |
| <i>EPI_ISL_2270085</i> |
| <i>EPI_ISL_2270086</i> |
| <i>EPI_ISL_2408427</i> |
| <i>EPI_ISL_2367228</i> |
| <i>EPI_ISL_2367229</i> |
| <i>EPI_ISL_2270095</i> |
| <i>EPI_ISL_2270096</i> |
| <i>EPI_ISL_2270098</i> |
| <i>EPI_ISL_2610954</i> |
| <i>EPI_ISL_2367230</i> |
| <i>EPI_ISL_2610955</i> |
| <i>EPI_ISL_2367231</i> |
| <i>EPI_ISL_2408428</i> |
| <i>EPI_ISL_2367232</i> |
| <i>EPI_ISL_2408429</i> |

|                        |
|------------------------|
| <i>EPI_ISL_2367233</i> |
| <i>EPI_ISL_2408430</i> |
| <i>EPI_ISL_2367234</i> |
| <i>EPI_ISL_2408431</i> |
| <i>EPI_ISL_2367235</i> |
| <i>EPI_ISL_2367236</i> |
| <i>EPI_ISL_2367237</i> |
| <i>EPI_ISL_2466563</i> |
| <i>EPI_ISL_2367238</i> |
| <i>EPI_ISL_2408432</i> |
| <i>EPI_ISL_2367239</i> |
| <i>EPI_ISL_2408433</i> |
| <i>EPI_ISL_2367240</i> |
| <i>EPI_ISL_2367241</i> |
| <i>EPI_ISL_2466564</i> |
| <i>EPI_ISL_2367242</i> |
| <i>EPI_ISL_2367243</i> |
| <i>EPI_ISL_2367245</i> |
| <i>EPI_ISL_2367246</i> |



|                        |
|------------------------|
| <i>EPI_ISL_2367247</i> |
| <i>EPI_ISL_2367248</i> |
| <i>EPI_ISL_2408434</i> |
| <i>EPI_ISL_2367249</i> |
| <i>EPI_ISL_2408435</i> |
| <i>EPI_ISL_2367250</i> |
| <i>EPI_ISL_2466565</i> |
| <i>EPI_ISL_2367252</i> |
| <i>EPI_ISL_2408437</i> |
| <i>EPI_ISL_2367253</i> |
| <i>EPI_ISL_2408438</i> |
| <i>EPI_ISL_2408440</i> |
| <i>EPI_ISL_2367255</i> |
| <i>EPI_ISL_2408441</i> |
| <i>EPI_ISL_2367257</i> |
| <i>EPI_ISL_2408442</i> |
| <i>EPI_ISL_2408443</i> |
| <i>EPI_ISL_2466566</i> |
| <i>EPI_ISL_2408445</i> |

|                        |
|------------------------|
| <i>EPI_ISL_2408446</i> |
| <i>EPI_ISL_2466567</i> |
| <i>EPI_ISL_2466568</i> |
| <i>EPI_ISL_2408448</i> |
| <i>EPI_ISL_2408449</i> |
| <i>EPI_ISL_2466569</i> |
| <i>EPI_ISL_2408450</i> |
| <i>EPI_ISL_2408451</i> |
| <i>EPI_ISL_2408452</i> |
| <i>EPI_ISL_2408453</i> |
| <i>EPI_ISL_2408454</i> |
| <i>EPI_ISL_2408455</i> |
| <i>EPI_ISL_2408456</i> |
| <i>EPI_ISL_2408457</i> |
| <i>EPI_ISL_2408458</i> |
| <i>EPI_ISL_2408459</i> |
| <i>EPI_ISL_2408460</i> |
| <i>EPI_ISL_2408461</i> |
| <i>EPI_ISL_2408462</i> |

|                        |
|------------------------|
| <i>EPI_ISL_2408463</i> |
| <i>EPI_ISL_2408464</i> |
| <i>EPI_ISL_2466570</i> |
| <i>EPI_ISL_2466571</i> |
| <i>EPI_ISL_2466572</i> |
| <i>EPI_ISL_2466573</i> |
| <i>EPI_ISL_2466574</i> |
| <i>EPI_ISL_2466575</i> |
| <i>EPI_ISL_2466576</i> |
| <i>EPI_ISL_2408470</i> |
| <i>EPI_ISL_2466577</i> |
| <i>EPI_ISL_2466578</i> |
| <i>EPI_ISL_2408471</i> |
| <i>EPI_ISL_2466592</i> |
| <i>EPI_ISL_2610956</i> |
| <i>EPI_ISL_2466593</i> |
| <i>EPI_ISL_2610957</i> |
| <i>EPI_ISL_2466594</i> |
| <i>EPI_ISL_2466595</i> |

|                        |
|------------------------|
| <i>EPI_ISL_2466596</i> |
| <i>EPI_ISL_2466597</i> |
| <i>EPI_ISL_2611026</i> |
| <i>EPI_ISL_2466583</i> |
| <i>EPI_ISL_2610958</i> |
| <i>EPI_ISL_2466600</i> |
| <i>EPI_ISL_2466601</i> |
| <i>EPI_ISL_2466602</i> |
| <i>EPI_ISL_2466603</i> |
| <i>EPI_ISL_2610961</i> |
| <i>EPI_ISL_2610962</i> |
| <i>EPI_ISL_2466604</i> |
| <i>EPI_ISL_2466605</i> |
| <i>EPI_ISL_2466606</i> |
| <i>EPI_ISL_2610963</i> |
| <i>EPI_ISL_2610964</i> |
| <i>EPI_ISL_2610965</i> |
| <i>EPI_ISL_2610990</i> |
| <i>EPI_ISL_2610966</i> |

|                        |
|------------------------|
| <i>EPI_ISL_2610967</i> |
| <i>EPI_ISL_2622136</i> |
| <i>EPI_ISL_2610968</i> |
| <i>EPI_ISL_2610969</i> |
| <i>EPI_ISL_2611035</i> |
| <i>EPI_ISL_830979</i>  |
| <i>EPI_ISL_830980</i>  |
| <i>EPI_ISL_830981</i>  |
| <i>EPI_ISL_830982</i>  |
| <i>EPI_ISL_830983</i>  |
| <i>EPI_ISL_930908</i>  |
| <i>EPI_ISL_930965</i>  |
| <i>EPI_ISL_930966</i>  |
| <i>EPI_ISL_930968</i>  |
| <i>EPI_ISL_931032</i>  |
| <i>EPI_ISL_931083</i>  |
| <i>EPI_ISL_931198</i>  |
| <i>EPI_ISL_931243</i>  |
| <i>EPI_ISL_931244</i>  |

|                        |
|------------------------|
| <i>EPI_ISL_931298</i>  |
| <i>EPI_ISL_931299</i>  |
| <i>EPI_ISL_931371</i>  |
| <i>EPI_ISL_931372</i>  |
| <i>EPI_ISL_931373</i>  |
| <i>EPI_ISL_931374</i>  |
| <i>EPI_ISL_3344128</i> |
| <i>EPI_ISL_1273467</i> |
| <i>EPI_ISL_1273468</i> |
| <i>EPI_ISL_2611046</i> |
| <i>EPI_ISL_2611047</i> |
| <i>EPI_ISL_1273475</i> |
| <i>EPI_ISL_2611048</i> |
| <i>EPI_ISL_1273476</i> |
| <i>EPI_ISL_1273477</i> |
| <i>EPI_ISL_1273478</i> |
| <i>EPI_ISL_1273479</i> |
| <i>EPI_ISL_1273484</i> |
| <i>EPI_ISL_1273490</i> |

|                        |
|------------------------|
| <i>EPI_ISL_931449</i>  |
| <i>EPI_ISL_931450</i>  |
| <i>EPI_ISL_1273502</i> |
| <i>EPI_ISL_1273515</i> |
| <i>EPI_ISL_2367258</i> |
| <i>EPI_ISL_1273516</i> |
| <i>EPI_ISL_1273517</i> |
| <i>EPI_ISL_1273609</i> |
| <i>EPI_ISL_942515</i>  |
| <i>EPI_ISL_1273621</i> |
| <i>EPI_ISL_1014696</i> |
| <i>EPI_ISL_1273631</i> |
| <i>EPI_ISL_2521398</i> |
| <i>EPI_ISL_2626178</i> |
| <i>EPI_ISL_1273650</i> |
| <i>EPI_ISL_1273651</i> |
| <i>EPI_ISL_1273652</i> |
| <i>EPI_ISL_1273754</i> |
| <i>EPI_ISL_1273663</i> |

|                        |
|------------------------|
| <i>EPI_ISL_1273664</i> |
| <i>EPI_ISL_1273671</i> |
| <i>EPI_ISL_1296840</i> |
| <i>EPI_ISL_1273672</i> |
| <i>EPI_ISL_1273673</i> |
| <i>EPI_ISL_1014694</i> |
| <i>EPI_ISL_1014695</i> |
| <i>EPI_ISL_1034152</i> |
| <i>EPI_ISL_1014700</i> |
| <i>EPI_ISL_1993861</i> |
| <i>EPI_ISL_1993862</i> |
| <i>EPI_ISL_1993863</i> |
| <i>EPI_ISL_1993864</i> |
| <i>EPI_ISL_1993865</i> |
| <i>EPI_ISL_1993866</i> |
| <i>EPI_ISL_1993919</i> |
| <i>EPI_ISL_1914608</i> |
| <i>EPI_ISL_1747944</i> |
| <i>EPI_ISL_1747639</i> |

|                        |
|------------------------|
| <i>EPI_ISL_1747633</i> |
| <i>EPI_ISL_1747627</i> |
| <i>EPI_ISL_2484290</i> |
| <i>EPI_ISL_2484486</i> |
| <i>EPI_ISL_2484274</i> |
| <i>EPI_ISL_2484412</i> |
| <i>EPI_ISL_2102117</i> |
| <i>EPI_ISL_2180999</i> |
| <i>EPI_ISL_1747929</i> |
| <i>EPI_ISL_1748290</i> |
| <i>EPI_ISL_1748254</i> |
| <i>EPI_ISL_1748295</i> |
| <i>EPI_ISL_1748160</i> |
| <i>EPI_ISL_1748007</i> |
| <i>EPI_ISL_1748407</i> |
| <i>EPI_ISL_1748328</i> |
| <i>EPI_ISL_1748400</i> |
| <i>EPI_ISL_1748416</i> |
| <i>EPI_ISL_1748471</i> |

|                        |
|------------------------|
| <i>EPI_ISL_1748445</i> |
| <i>EPI_ISL_1748689</i> |
| <i>EPI_ISL_1748698</i> |
| <i>EPI_ISL_1748531</i> |
| <i>EPI_ISL_1748622</i> |
| <i>EPI_ISL_1748585</i> |
| <i>EPI_ISL_1748609</i> |
| <i>EPI_ISL_1748592</i> |
| <i>EPI_ISL_1748600</i> |
| <i>EPI_ISL_1748550</i> |
| <i>EPI_ISL_1748554</i> |
| <i>EPI_ISL_1748631</i> |
| <i>EPI_ISL_1973568</i> |
| <i>EPI_ISL_1833746</i> |
| <i>EPI_ISL_1993920</i> |
| <i>EPI_ISL_1833748</i> |
| <i>EPI_ISL_1993921</i> |
| <i>EPI_ISL_1993867</i> |
| <i>EPI_ISL_1993868</i> |

|                        |
|------------------------|
| <i>EPI_ISL_1993922</i> |
| <i>EPI_ISL_1833751</i> |
| <i>EPI_ISL_1993923</i> |
| <i>EPI_ISL_1993869</i> |
| <i>EPI_ISL_2622151</i> |
| <i>EPI_ISL_2622152</i> |
| <i>EPI_ISL_2622153</i> |
| <i>EPI_ISL_2622154</i> |
| <i>EPI_ISL_1993870</i> |
| <i>EPI_ISL_1993871</i> |
| <i>EPI_ISL_1993872</i> |
| <i>EPI_ISL_2622155</i> |
| <i>EPI_ISL_2622156</i> |
| <i>EPI_ISL_2622157</i> |
| <i>EPI_ISL_2622158</i> |
| <i>EPI_ISL_1993873</i> |
| <i>EPI_ISL_2622159</i> |
| <i>EPI_ISL_2102119</i> |
| <i>EPI_ISL_2102120</i> |

|                        |
|------------------------|
| <i>EPI_ISL_2181002</i> |
| <i>EPI_ISL_2270101</i> |
| <i>EPI_ISL_2270102</i> |
| <i>EPI_ISL_2270104</i> |
| <i>EPI_ISL_2181004</i> |
| <i>EPI_ISL_2270106</i> |
| <i>EPI_ISL_2408473</i> |
| <i>EPI_ISL_2367259</i> |
| <i>EPI_ISL_2466589</i> |
| <i>EPI_ISL_2367260</i> |
| <i>EPI_ISL_2466590</i> |
| <i>EPI_ISL_2408474</i> |
| <i>EPI_ISL_2408475</i> |
| <i>EPI_ISL_2611003</i> |
| <i>EPI_ISL_2466591</i> |
| <i>EPI_ISL_2484305</i> |
| <i>EPI_ISL_1273653</i> |
| <i>EPI_ISL_2484394</i> |
| <i>EPI_ISL_2484320</i> |

|                        |
|------------------------|
| <i>EPI_ISL_2484515</i> |
| <i>EPI_ISL_2484516</i> |
| <i>EPI_ISL_2484447</i> |
| <i>EPI_ISL_1747953</i> |
| <i>EPI_ISL_1747935</i> |
| <i>EPI_ISL_1748107</i> |
| <i>EPI_ISL_1748324</i> |
| <i>EPI_ISL_1993934</i> |
| <i>EPI_ISL_1993941</i> |
| <i>EPI_ISL_2181005</i> |
| <i>EPI_ISL_2466607</i> |
| <i>EPI_ISL_2274447</i> |
| <i>EPI_ISL_466927</i>  |
| <i>EPI_ISL_466931</i>  |
| <i>EPI_ISL_466939</i>  |
| <i>EPI_ISL_466940</i>  |
| <i>EPI_ISL_466941</i>  |
| <i>EPI_ISL_466942</i>  |
| <i>EPI_ISL_466944</i>  |

|                       |
|-----------------------|
| <i>EPI_ISL_466946</i> |
| <i>EPI_ISL_466949</i> |
| <i>EPI_ISL_466951</i> |
| <i>EPI_ISL_466952</i> |
| <i>EPI_ISL_466953</i> |
| <i>EPI_ISL_466954</i> |
| <i>EPI_ISL_466958</i> |
| <i>EPI_ISL_466960</i> |
| <i>EPI_ISL_466985</i> |
| <i>EPI_ISL_451675</i> |
| <i>EPI_ISL_451695</i> |
| <i>EPI_ISL_451699</i> |
| <i>EPI_ISL_451700</i> |
| <i>EPI_ISL_451703</i> |
| <i>EPI_ISL_451713</i> |
| <i>EPI_ISL_451716</i> |
| <i>EPI_ISL_451728</i> |
| <i>EPI_ISL_451732</i> |
| <i>EPI_ISL_574905</i> |

|                        |
|------------------------|
| <i>EPI_ISL_574906</i>  |
| <i>EPI_ISL_574907</i>  |
| <i>EPI_ISL_574908</i>  |
| <i>EPI_ISL_574909</i>  |
| <i>EPI_ISL_574910</i>  |
| <i>EPI_ISL_574911</i>  |
| <i>EPI_ISL_1130016</i> |
| <i>EPI_ISL_574912</i>  |
| <i>EPI_ISL_451772</i>  |
| <i>EPI_ISL_451774</i>  |
| <i>EPI_ISL_451778</i>  |
| <i>EPI_ISL_451803</i>  |
| <i>EPI_ISL_451814</i>  |
| <i>EPI_ISL_451820</i>  |
| <i>EPI_ISL_451841</i>  |
| <i>EPI_ISL_486442</i>  |
| <i>EPI_ISL_486443</i>  |
| <i>EPI_ISL_486445</i>  |
| <i>EPI_ISL_486456</i>  |

|                |
|----------------|
| EPI_ISL_486473 |
| EPI_ISL_486474 |
| EPI_ISL_451874 |
| EPI_ISL_451885 |
| EPI_ISL_451895 |
| EPI_ISL_451897 |
| EPI_ISL_451899 |
| EPI_ISL_468210 |
| EPI_ISL_468213 |
| EPI_ISL_468221 |
| EPI_ISL_468225 |
| EPI_ISL_468254 |
| EPI_ISL_467001 |
| EPI_ISL_467012 |
| EPI_ISL_476108 |
| EPI_ISL_486538 |
| EPI_ISL_500941 |
| EPI_ISL_500944 |
| EPI_ISL_510739 |

|                 |
|-----------------|
| EPI_ISL_510747  |
| EPI_ISL_512043  |
| EPI_ISL_516563  |
| EPI_ISL_1130040 |
| EPI_ISL_523907  |
| EPI_ISL_523925  |
| EPI_ISL_535585  |
| EPI_ISL_535587  |
| EPI_ISL_535610  |
| EPI_ISL_1130001 |
| EPI_ISL_535629  |
| EPI_ISL_535632  |
| EPI_ISL_535636  |
| EPI_ISL_535637  |
| EPI_ISL_535640  |
| EPI_ISL_535649  |
| EPI_ISL_539377  |
| EPI_ISL_539378  |
| EPI_ISL_541463  |

|                 |
|-----------------|
| EPI_ISL_560470  |
| EPI_ISL_560471  |
| EPI_ISL_560472  |
| EPI_ISL_1130013 |
| EPI_ISL_560473  |
| EPI_ISL_560474  |
| EPI_ISL_603343  |
| EPI_ISL_603356  |
| EPI_ISL_603420  |
| EPI_ISL_603421  |
| EPI_ISL_603620  |
| EPI_ISL_603682  |
| EPI_ISL_603732  |
| EPI_ISL_1496513 |
| EPI_ISL_1496524 |
| EPI_ISL_1496520 |
| EPI_ISL_614899  |
| EPI_ISL_614900  |
| EPI_ISL_614901  |

|                 |
|-----------------|
| EPI_ISL_614902  |
| EPI_ISL_614903  |
| EPI_ISL_614904  |
| EPI_ISL_614905  |
| EPI_ISL_614906  |
| EPI_ISL_1496515 |
| EPI_ISL_1496518 |
| EPI_ISL_1496521 |
| EPI_ISL_1496523 |
| EPI_ISL_1496516 |
| EPI_ISL_1496514 |
| EPI_ISL_1496262 |
| EPI_ISL_1496280 |
| EPI_ISL_1496522 |
| EPI_ISL_1496517 |
| EPI_ISL_2724424 |
| EPI_ISL_2724423 |
| EPI_ISL_2724426 |
| EPI_ISL_2938392 |

|                 |
|-----------------|
| EPI_ISL_3296240 |
| EPI_ISL_3007559 |
| EPI_ISL_2938386 |
| EPI_ISL_3007561 |
| EPI_ISL_2938390 |
| EPI_ISL_2938394 |
| EPI_ISL_2938389 |
| EPI_ISL_2938393 |
| EPI_ISL_2938395 |
| EPI_ISL_2938388 |
| EPI_ISL_2938387 |
| EPI_ISL_2938396 |
| EPI_ISL_2938385 |
| EPI_ISL_2938391 |
| EPI_ISL_3465251 |
| EPI_ISL_3465308 |
| EPI_ISL_3465280 |
| EPI_ISL_3465269 |
| EPI_ISL_3465290 |

|                 |
|-----------------|
| EPI_ISL_3296248 |
| EPI_ISL_3296292 |
| EPI_ISL_3296302 |
| EPI_ISL_3296300 |
| EPI_ISL_3296250 |
| EPI_ISL_3296209 |
| EPI_ISL_3296205 |
| EPI_ISL_3296203 |
| EPI_ISL_3296298 |
| EPI_ISL_3296194 |
| EPI_ISL_3296232 |
| EPI_ISL_3296238 |
| EPI_ISL_3296228 |
| EPI_ISL_3296304 |
| EPI_ISL_3296308 |
| EPI_ISL_3296290 |
| EPI_ISL_3296286 |
| EPI_ISL_3296224 |
| EPI_ISL_3296219 |

|                 |
|-----------------|
| EPI_ISL_3296265 |
| EPI_ISL_3296260 |
| EPI_ISL_3296221 |
| EPI_ISL_3296242 |
| EPI_ISL_3296230 |
| EPI_ISL_3296207 |
| EPI_ISL_3296254 |
| EPI_ISL_3296199 |
| EPI_ISL_3296271 |
| EPI_ISL_3296246 |
| EPI_ISL_3296263 |
| EPI_ISL_3296196 |
| EPI_ISL_3296257 |
| EPI_ISL_3296269 |
| EPI_ISL_3296217 |
| EPI_ISL_3296252 |
| EPI_ISL_3296267 |
| EPI_ISL_3296296 |
| EPI_ISL_3296226 |

|                 |
|-----------------|
| EPI_ISL_3296279 |
| EPI_ISL_3296275 |
| EPI_ISL_3296236 |
| EPI_ISL_3296234 |
| EPI_ISL_3296288 |
| EPI_ISL_3296201 |
| EPI_ISL_3296306 |
| EPI_ISL_3296215 |
| EPI_ISL_3296284 |
| EPI_ISL_3296273 |
| EPI_ISL_3296277 |
| EPI_ISL_3296294 |
| EPI_ISL_3296211 |
| EPI_ISL_3296310 |
| EPI_ISL_3296213 |
| EPI_ISL_3296258 |
| EPI_ISL_3296281 |
| EPI_ISL_3296244 |
| EPI_ISL_3345910 |

|                 |
|-----------------|
| EPI_ISL_3345900 |
| EPI_ISL_3345889 |
| EPI_ISL_3345915 |
| EPI_ISL_3345904 |
| EPI_ISL_3345895 |
| EPI_ISL_3345909 |
| EPI_ISL_3345877 |
| EPI_ISL_3345931 |
| EPI_ISL_3345892 |
| EPI_ISL_4486606 |
| EPI_ISL_4486610 |
| EPI_ISL_4486618 |
| EPI_ISL_4486611 |
| EPI_ISL_4486617 |
| EPI_ISL_4486615 |
| EPI_ISL_3345882 |
| EPI_ISL_3345901 |
| EPI_ISL_3345876 |
| EPI_ISL_4486608 |



|                 |
|-----------------|
| EPI_ISL_3345922 |
| EPI_ISL_3345914 |
| EPI_ISL_4486613 |
| EPI_ISL_3345906 |
| EPI_ISL_3345928 |
| EPI_ISL_3345881 |
| EPI_ISL_3345874 |
| EPI_ISL_3345933 |
| EPI_ISL_3345907 |
| EPI_ISL_3345879 |
| EPI_ISL_3345926 |
| EPI_ISL_3345925 |
| EPI_ISL_3345885 |
| EPI_ISL_3345923 |
| EPI_ISL_3345917 |
| EPI_ISL_3345903 |
| EPI_ISL_3345893 |
| EPI_ISL_3345912 |
| EPI_ISL_3345884 |

|                 |
|-----------------|
| EPI_ISL_3345896 |
| EPI_ISL_3345898 |
| EPI_ISL_3345918 |
| EPI_ISL_3345890 |
| EPI_ISL_3345929 |
| EPI_ISL_3345887 |
| EPI_ISL_3476209 |
| EPI_ISL_3476211 |
| EPI_ISL_3345920 |
| EPI_ISL_3476202 |
| EPI_ISL_3476203 |
| EPI_ISL_3476205 |
| EPI_ISL_3476208 |
| EPI_ISL_3476207 |
| EPI_ISL_3476214 |
| EPI_ISL_3476201 |
| EPI_ISL_3476206 |
| EPI_ISL_3476204 |
| EPI_ISL_3476213 |

|                 |
|-----------------|
| EPI_ISL_3476210 |
| EPI_ISL_3465283 |
| EPI_ISL_3476212 |
| EPI_ISL_3465289 |
| EPI_ISL_3465303 |
| EPI_ISL_3465294 |
| EPI_ISL_3465262 |
| EPI_ISL_3465267 |
| EPI_ISL_3465295 |
| EPI_ISL_3465271 |
| EPI_ISL_3465255 |
| EPI_ISL_3465273 |
| EPI_ISL_3465266 |
| EPI_ISL_3465243 |
| EPI_ISL_3465301 |
| EPI_ISL_3465246 |
| EPI_ISL_3465299 |
| EPI_ISL_3465244 |
| EPI_ISL_3465287 |

|                 |
|-----------------|
| EPI_ISL_3465249 |
| EPI_ISL_3465292 |
| EPI_ISL_3465241 |
| EPI_ISL_3465297 |
| EPI_ISL_3465304 |
| EPI_ISL_3465253 |
| EPI_ISL_3465276 |
| EPI_ISL_3465274 |
| EPI_ISL_3465306 |
| EPI_ISL_3465285 |
| EPI_ISL_3465281 |
| EPI_ISL_3465260 |
| EPI_ISL_3854239 |
| EPI_ISL_3465258 |
| EPI_ISL_3465264 |
| EPI_ISL_3465278 |
| EPI_ISL_3465248 |
| EPI_ISL_3465256 |
| EPI_ISL_3854248 |

|                 |
|-----------------|
| EPI_ISL_3854236 |
| EPI_ISL_3854234 |
| EPI_ISL_3854242 |
| EPI_ISL_3854252 |
| EPI_ISL_3854262 |
| EPI_ISL_3854257 |
| EPI_ISL_4233541 |
| EPI_ISL_4233535 |
| EPI_ISL_4233536 |
| EPI_ISL_4233529 |
| EPI_ISL_4233540 |
| EPI_ISL_4233528 |
| EPI_ISL_4233538 |
| EPI_ISL_4233530 |
| EPI_ISL_4233532 |
| EPI_ISL_4233533 |
| EPI_ISL_4233531 |
| EPI_ISL_4233537 |
| EPI_ISL_4233534 |

|                 |
|-----------------|
| EPI_ISL_4233539 |
| EPI_ISL_4025398 |
| EPI_ISL_4025399 |
| EPI_ISL_4025400 |
| EPI_ISL_4025401 |
| EPI_ISL_3854237 |
| EPI_ISL_3854232 |
| EPI_ISL_3854250 |
| EPI_ISL_3854245 |
| EPI_ISL_3854247 |
| EPI_ISL_3854244 |
| EPI_ISL_3854253 |
| EPI_ISL_4318024 |
| EPI_ISL_4233999 |
| EPI_ISL_4233990 |
| EPI_ISL_4233992 |
| EPI_ISL_4318030 |
| EPI_ISL_4236355 |
| EPI_ISL_4236356 |

|                 |
|-----------------|
| EPI_ISL_4236354 |
| EPI_ISL_4236340 |
| EPI_ISL_4236347 |
| EPI_ISL_4234002 |
| EPI_ISL_4318005 |
| EPI_ISL_4236349 |
| EPI_ISL_4236344 |
| EPI_ISL_4236341 |
| EPI_ISL_4236345 |
| EPI_ISL_4236348 |
| EPI_ISL_4236350 |
| EPI_ISL_4236339 |
| EPI_ISL_4236346 |
| EPI_ISL_4236338 |
| EPI_ISL_4236335 |
| EPI_ISL_4236353 |
| EPI_ISL_4233991 |
| EPI_ISL_4236342 |
| EPI_ISL_4234000 |

|                 |
|-----------------|
| EPI_ISL_4233984 |
| EPI_ISL_4233988 |
| EPI_ISL_4234001 |
| EPI_ISL_4318027 |
| EPI_ISL_4316074 |
| EPI_ISL_4236336 |
| EPI_ISL_4236337 |
| EPI_ISL_4317999 |
| EPI_ISL_4236343 |
| EPI_ISL_4317970 |
| EPI_ISL_4236333 |
| EPI_ISL_4236334 |
| EPI_ISL_4233997 |
| EPI_ISL_4233985 |
| EPI_ISL_4233986 |
| EPI_ISL_4233994 |
| EPI_ISL_4233993 |
| EPI_ISL_4233998 |
| EPI_ISL_4236351 |

|                 |
|-----------------|
| EPI_ISL_4233989 |
| EPI_ISL_4233996 |
| EPI_ISL_4233982 |
| EPI_ISL_4236352 |
| EPI_ISL_4316075 |
| EPI_ISL_4233987 |
| EPI_ISL_4233995 |
| EPI_ISL_4233983 |
| EPI_ISL_4316084 |
| EPI_ISL_4316072 |
| EPI_ISL_4316086 |
| EPI_ISL_4316067 |
| EPI_ISL_4316092 |
| EPI_ISL_4316090 |
| EPI_ISL_4316088 |
| EPI_ISL_4316070 |
| EPI_ISL_4339335 |
| EPI_ISL_4318002 |
| EPI_ISL_4318014 |

|                 |
|-----------------|
| EPI_ISL_4317973 |
| EPI_ISL_4339331 |
| EPI_ISL_4317988 |
| EPI_ISL_4339333 |
| EPI_ISL_4316077 |
| EPI_ISL_4317976 |
| EPI_ISL_4318008 |
| EPI_ISL_4317996 |
| EPI_ISL_4318018 |
| EPI_ISL_4318034 |
| EPI_ISL_4317979 |
| EPI_ISL_4317982 |
| EPI_ISL_4318011 |
| EPI_ISL_4316079 |
| EPI_ISL_4318021 |
| EPI_ISL_4316082 |
| EPI_ISL_4317993 |
| EPI_ISL_4317964 |
| EPI_ISL_4317967 |

|                 |
|-----------------|
| EPI_ISL_4317985 |
| EPI_ISL_4487212 |
| EPI_ISL_4487209 |
| EPI_ISL_4487206 |
| EPI_ISL_4487215 |
| EPI_ISL_4581208 |
| EPI_ISL_4588371 |
| EPI_ISL_4631455 |
| EPI_ISL_4631453 |
| EPI_ISL_4631451 |
| EPI_ISL_4631458 |
| EPI_ISL_4631456 |
| EPI_ISL_4631459 |
| EPI_ISL_4631452 |
| EPI_ISL_4631460 |
| EPI_ISL_4631457 |
| EPI_ISL_4631450 |
| EPI_ISL_4631454 |
| EPI_ISL_4581201 |

|                 |
|-----------------|
| EPI_ISL_4791058 |
| EPI_ISL_728846  |
| EPI_ISL_693862  |
| EPI_ISL_693867  |
| EPI_ISL_693870  |
| EPI_ISL_693872  |
| EPI_ISL_693873  |
| EPI_ISL_693888  |
| EPI_ISL_1005181 |
| EPI_ISL_1005170 |
| EPI_ISL_1005142 |
| EPI_ISL_1005080 |
| EPI_ISL_1130039 |
| EPI_ISL_693939  |
| EPI_ISL_693941  |
| EPI_ISL_693942  |
| EPI_ISL_693943  |
| EPI_ISL_693944  |
| EPI_ISL_693945  |

|                 |
|-----------------|
| EPI_ISL_693946  |
| EPI_ISL_693947  |
| EPI_ISL_694003  |
| EPI_ISL_728973  |
| EPI_ISL_721801  |
| EPI_ISL_721802  |
| EPI_ISL_1130045 |
| EPI_ISL_721684  |
| EPI_ISL_721803  |
| EPI_ISL_721804  |
| EPI_ISL_721805  |
| EPI_ISL_899515  |
| EPI_ISL_729081  |
| EPI_ISL_729130  |
| EPI_ISL_1130037 |
| EPI_ISL_1129997 |
| EPI_ISL_729001  |
| EPI_ISL_728774  |
| EPI_ISL_1130027 |

|                 |
|-----------------|
| EPI_ISL_1130042 |
| EPI_ISL_737413  |
| EPI_ISL_737431  |
| EPI_ISL_737549  |
| EPI_ISL_1002357 |
| EPI_ISL_1130008 |
| EPI_ISL_768101  |
| EPI_ISL_1260205 |
| EPI_ISL_1260201 |
| EPI_ISL_1260200 |
| EPI_ISL_1259430 |
| EPI_ISL_1260202 |
| EPI_ISL_1259558 |
| EPI_ISL_1260195 |
| EPI_ISL_1260186 |
| EPI_ISL_1130055 |
| EPI_ISL_768100  |
| EPI_ISL_768102  |
| EPI_ISL_768104  |

|                 |
|-----------------|
| EPI_ISL_1130030 |
| EPI_ISL_1130009 |
| EPI_ISL_768103  |
| EPI_ISL_796434  |
| EPI_ISL_796258  |
| EPI_ISL_796432  |
| EPI_ISL_796430  |
| EPI_ISL_796274  |
| EPI_ISL_1407052 |
| EPI_ISL_796433  |
| EPI_ISL_796429  |
| EPI_ISL_796187  |
| EPI_ISL_796238  |
| EPI_ISL_1130005 |
| EPI_ISL_1129996 |
| EPI_ISL_1130018 |
| EPI_ISL_796270  |
| EPI_ISL_1406900 |
| EPI_ISL_1130024 |

|                 |
|-----------------|
| EPI_ISL_796198  |
| EPI_ISL_796431  |
| EPI_ISL_1130003 |
| EPI_ISL_796263  |
| EPI_ISL_796276  |
| EPI_ISL_1130058 |
| EPI_ISL_899516  |
| EPI_ISL_1130012 |
| EPI_ISL_899517  |
| EPI_ISL_899518  |
| EPI_ISL_899519  |
| EPI_ISL_899520  |
| EPI_ISL_899521  |
| EPI_ISL_899066  |
| EPI_ISL_899522  |
| EPI_ISL_899523  |
| EPI_ISL_1004940 |
| EPI_ISL_1130021 |
| EPI_ISL_1004939 |

|                 |
|-----------------|
| EPI_ISL_1004938 |
| EPI_ISL_1407053 |
| EPI_ISL_1004762 |
| EPI_ISL_1004761 |
| EPI_ISL_1004753 |
| EPI_ISL_899524  |
| EPI_ISL_899525  |
| EPI_ISL_899526  |
| EPI_ISL_899527  |
| EPI_ISL_899528  |
| EPI_ISL_1130032 |
| EPI_ISL_1130049 |
| EPI_ISL_899529  |
| EPI_ISL_1406868 |
| EPI_ISL_1004669 |
| EPI_ISL_1004668 |
| EPI_ISL_1004598 |
| EPI_ISL_1004573 |
| EPI_ISL_1004473 |

|                 |
|-----------------|
| EPI_ISL_1004437 |
| EPI_ISL_1130052 |
| EPI_ISL_1406906 |
| EPI_ISL_1004438 |
| EPI_ISL_1004358 |
| EPI_ISL_1004359 |
| EPI_ISL_1004326 |
| EPI_ISL_1004361 |
| EPI_ISL_1004360 |
| EPI_ISL_1004357 |
| EPI_ISL_1259544 |
| EPI_ISL_1004253 |
| EPI_ISL_1004278 |
| EPI_ISL_1004277 |
| EPI_ISL_1004276 |
| EPI_ISL_1004258 |
| EPI_ISL_1004245 |
| EPI_ISL_1406937 |
| EPI_ISL_899530  |

|                 |
|-----------------|
| EPI_ISL_899531  |
| EPI_ISL_1002217 |
| EPI_ISL_1001702 |
| EPI_ISL_1002493 |
| EPI_ISL_1002627 |
| EPI_ISL_1002626 |
| EPI_ISL_1002629 |
| EPI_ISL_1002630 |
| EPI_ISL_1002628 |
| EPI_ISL_1002685 |
| EPI_ISL_1002807 |
| EPI_ISL_1002805 |
| EPI_ISL_1130015 |
| EPI_ISL_1130000 |
| EPI_ISL_1002806 |
| EPI_ISL_1002809 |
| EPI_ISL_1002804 |
| EPI_ISL_1002810 |
| EPI_ISL_1002802 |

|                 |
|-----------------|
| EPI_ISL_1002808 |
| EPI_ISL_1002803 |
| EPI_ISL_1002858 |
| EPI_ISL_1002859 |
| EPI_ISL_1002899 |
| EPI_ISL_1002895 |
| EPI_ISL_1002898 |
| EPI_ISL_1002897 |
| EPI_ISL_1002896 |
| EPI_ISL_1002900 |
| EPI_ISL_899532  |
| EPI_ISL_899533  |
| EPI_ISL_899534  |
| EPI_ISL_1059552 |
| EPI_ISL_899041  |
| EPI_ISL_1059319 |
| EPI_ISL_1059560 |
| EPI_ISL_899535  |
| EPI_ISL_899536  |

|                 |
|-----------------|
| EPI_ISL_1002273 |
| EPI_ISL_1003251 |
| EPI_ISL_1003249 |
| EPI_ISL_1003250 |
| EPI_ISL_1001986 |
| EPI_ISL_1130011 |
| EPI_ISL_1130057 |
| EPI_ISL_1001949 |
| EPI_ISL_1002009 |
| EPI_ISL_1002037 |
| EPI_ISL_1003058 |
| EPI_ISL_1003106 |
| EPI_ISL_1003313 |
| EPI_ISL_1259496 |
| EPI_ISL_1059559 |
| EPI_ISL_1130026 |
| EPI_ISL_1003164 |
| EPI_ISL_1001516 |
| EPI_ISL_1130043 |

|                 |
|-----------------|
| EPI_ISL_1406952 |
| EPI_ISL_1002087 |
| EPI_ISL_1129999 |
| EPI_ISL_1003658 |
| EPI_ISL_1003493 |
| EPI_ISL_1003558 |
| EPI_ISL_1130010 |
| EPI_ISL_1003559 |
| EPI_ISL_1130029 |
| EPI_ISL_1001497 |
| EPI_ISL_1130002 |
| EPI_ISL_1003789 |
| EPI_ISL_1130056 |
| EPI_ISL_1130059 |
| EPI_ISL_1130023 |
| EPI_ISL_1059359 |
| EPI_ISL_1059555 |
| EPI_ISL_1059554 |
| EPI_ISL_1059556 |

|                 |
|-----------------|
| EPI_ISL_1059550 |
| EPI_ISL_1059393 |
| EPI_ISL_1130025 |
| EPI_ISL_1001500 |
| EPI_ISL_1002319 |
| EPI_ISL_1003909 |
| EPI_ISL_1001616 |
| EPI_ISL_1130038 |
| EPI_ISL_1130022 |
| EPI_ISL_1130047 |
| EPI_ISL_1130048 |
| EPI_ISL_1130051 |
| EPI_ISL_1130046 |
| EPI_ISL_1004060 |
| EPI_ISL_1130041 |
| EPI_ISL_1130035 |
| EPI_ISL_1130054 |
| EPI_ISL_1130031 |
| EPI_ISL_1129994 |

|                 |
|-----------------|
| EPI_ISL_1002428 |
| EPI_ISL_1002425 |
| EPI_ISL_1002424 |
| EPI_ISL_1002427 |
| EPI_ISL_1002426 |
| EPI_ISL_1002421 |
| EPI_ISL_1002422 |
| EPI_ISL_1002423 |
| EPI_ISL_1002248 |
| EPI_ISL_1130007 |
| EPI_ISL_1129998 |
| EPI_ISL_1130019 |
| EPI_ISL_1059553 |
| EPI_ISL_1059551 |
| EPI_ISL_1059434 |
| EPI_ISL_1059433 |
| EPI_ISL_1059557 |
| EPI_ISL_1130028 |
| EPI_ISL_1130014 |



|                 |
|-----------------|
| EPI_ISL_1130033 |
| EPI_ISL_1130044 |
| EPI_ISL_1130004 |
| EPI_ISL_1130053 |
| EPI_ISL_1129995 |
| EPI_ISL_1130034 |
| EPI_ISL_1130036 |
| EPI_ISL_1130020 |
| EPI_ISL_1130050 |
| EPI_ISL_1130006 |
| EPI_ISL_1130017 |
| EPI_ISL_1059417 |
| EPI_ISL_1080515 |
| EPI_ISL_1080516 |
| EPI_ISL_1080500 |
| EPI_ISL_1080525 |
| EPI_ISL_1059558 |
| EPI_ISL_1059412 |
| EPI_ISL_1080524 |

|                 |
|-----------------|
| EPI_ISL_1119911 |
| EPI_ISL_1119225 |
| EPI_ISL_1119226 |
| EPI_ISL_1119360 |
| EPI_ISL_1119130 |
| EPI_ISL_1119398 |
| EPI_ISL_1118961 |
| EPI_ISL_1119216 |
| EPI_ISL_1119243 |
| EPI_ISL_1119242 |
| EPI_ISL_1119299 |
| EPI_ISL_1119199 |
| EPI_ISL_1119220 |
| EPI_ISL_1119325 |
| EPI_ISL_1119036 |
| EPI_ISL_1119038 |
| EPI_ISL_1119037 |
| EPI_ISL_1119454 |
| EPI_ISL_1119197 |

|                 |
|-----------------|
| EPI_ISL_1119266 |
| EPI_ISL_1119081 |
| EPI_ISL_1119389 |
| EPI_ISL_1120023 |
| EPI_ISL_1120065 |
| EPI_ISL_1119493 |
| EPI_ISL_1119573 |
| EPI_ISL_1119572 |
| EPI_ISL_1119665 |
| EPI_ISL_1119664 |
| EPI_ISL_1119381 |
| EPI_ISL_1119829 |
| EPI_ISL_1119900 |
| EPI_ISL_1194992 |
| EPI_ISL_1194995 |
| EPI_ISL_1194991 |
| EPI_ISL_1194993 |
| EPI_ISL_1194994 |
| EPI_ISL_1260189 |

|                 |
|-----------------|
| EPI_ISL_1260188 |
| EPI_ISL_1260191 |
| EPI_ISL_1260197 |
| EPI_ISL_1260190 |
| EPI_ISL_1259794 |
| EPI_ISL_1259423 |
| EPI_ISL_1259630 |
| EPI_ISL_1260194 |
| EPI_ISL_1259417 |
| EPI_ISL_1260193 |
| EPI_ISL_1260199 |
| EPI_ISL_1260203 |
| EPI_ISL_1260192 |
| EPI_ISL_1259454 |
| EPI_ISL_1259631 |
| EPI_ISL_1408675 |
| EPI_ISL_1654180 |
| EPI_ISL_1408366 |
| EPI_ISL_1408674 |

|                 |
|-----------------|
| EPI_ISL_1654041 |
| EPI_ISL_1408672 |
| EPI_ISL_1408386 |
| EPI_ISL_1654194 |
| EPI_ISL_1408671 |
| EPI_ISL_1408678 |
| EPI_ISL_1408673 |
| EPI_ISL_1407549 |
| EPI_ISL_1407481 |
| EPI_ISL_1408670 |
| EPI_ISL_1407929 |
| EPI_ISL_1408144 |
| EPI_ISL_1408142 |
| EPI_ISL_1407930 |
| EPI_ISL_1408139 |
| EPI_ISL_1407528 |
| EPI_ISL_1407529 |
| EPI_ISL_1407616 |
| EPI_ISL_1407729 |

|                 |
|-----------------|
| EPI_ISL_1407928 |
| EPI_ISL_1259470 |
| EPI_ISL_1259471 |
| EPI_ISL_1259747 |
| EPI_ISL_1260204 |
| EPI_ISL_1260196 |
| EPI_ISL_1260187 |
| EPI_ISL_1260206 |
| EPI_ISL_1360859 |
| EPI_ISL_1260198 |
| EPI_ISL_1360845 |
| EPI_ISL_1360863 |
| EPI_ISL_1360848 |
| EPI_ISL_1360838 |
| EPI_ISL_1360858 |
| EPI_ISL_1360861 |
| EPI_ISL_1360846 |
| EPI_ISL_1360850 |
| EPI_ISL_1760929 |

|                 |
|-----------------|
| EPI_ISL_1760915 |
| EPI_ISL_1760926 |
| EPI_ISL_1760918 |
| EPI_ISL_1760931 |
| EPI_ISL_1760928 |
| EPI_ISL_1760920 |
| EPI_ISL_1760916 |
| EPI_ISL_1760925 |
| EPI_ISL_1760927 |
| EPI_ISL_1760923 |
| EPI_ISL_1760924 |
| EPI_ISL_1760930 |
| EPI_ISL_1760932 |
| EPI_ISL_1760917 |
| EPI_ISL_1760921 |
| EPI_ISL_1360866 |
| EPI_ISL_1360865 |
| EPI_ISL_1360841 |
| EPI_ISL_1360853 |

|                 |
|-----------------|
| EPI_ISL_1760922 |
| EPI_ISL_1360839 |
| EPI_ISL_1360847 |
| EPI_ISL_1360844 |
| EPI_ISL_1760919 |
| EPI_ISL_1408669 |
| EPI_ISL_1360856 |
| EPI_ISL_1360867 |
| EPI_ISL_1408668 |
| EPI_ISL_1408677 |
| EPI_ISL_1408676 |
| EPI_ISL_1360843 |
| EPI_ISL_1360860 |
| EPI_ISL_1360862 |
| EPI_ISL_1360840 |
| EPI_ISL_1360842 |
| EPI_ISL_1360854 |
| EPI_ISL_1360864 |
| EPI_ISL_1360849 |

|                 |
|-----------------|
| EPI_ISL_1360851 |
| EPI_ISL_1360852 |
| EPI_ISL_1360855 |
| EPI_ISL_1360857 |
| EPI_ISL_1407927 |
| EPI_ISL_1408143 |
| EPI_ISL_1407781 |
| EPI_ISL_1407480 |
| EPI_ISL_1408371 |
| EPI_ISL_1407923 |
| EPI_ISL_1407931 |
| EPI_ISL_1407924 |
| EPI_ISL_1407932 |
| EPI_ISL_1407925 |
| EPI_ISL_1407755 |
| EPI_ISL_1408263 |
| EPI_ISL_1407503 |
| EPI_ISL_1407558 |
| EPI_ISL_1654145 |

|                 |
|-----------------|
| EPI_ISL_1408356 |
| EPI_ISL_1654105 |
| EPI_ISL_1408341 |
| EPI_ISL_1654037 |
| EPI_ISL_1408404 |
| EPI_ISL_1654060 |
| EPI_ISL_1654166 |
| EPI_ISL_1407926 |
| EPI_ISL_1496519 |
| EPI_ISL_1496241 |
| EPI_ISL_1407499 |
| EPI_ISL_1407933 |
| EPI_ISL_1408141 |
| EPI_ISL_1408140 |
| EPI_ISL_1598351 |
| EPI_ISL_1598792 |
| EPI_ISL_1598793 |
| EPI_ISL_1598329 |
| EPI_ISL_1598791 |

|                 |
|-----------------|
| EPI_ISL_1598341 |
| EPI_ISL_1598338 |
| EPI_ISL_1598344 |
| EPI_ISL_1598346 |
| EPI_ISL_1598637 |
| EPI_ISL_1598349 |
| EPI_ISL_1598772 |
| EPI_ISL_1598110 |
| EPI_ISL_1598331 |
| EPI_ISL_1598337 |
| EPI_ISL_1598354 |
| EPI_ISL_1598985 |
| EPI_ISL_1598986 |
| EPI_ISL_1598980 |
| EPI_ISL_1598977 |
| EPI_ISL_1598978 |
| EPI_ISL_1598979 |
| EPI_ISL_1598981 |
| EPI_ISL_1598613 |

|                 |
|-----------------|
| EPI_ISL_1598054 |
| EPI_ISL_1598983 |
| EPI_ISL_1598069 |
| EPI_ISL_1598094 |
| EPI_ISL_1597875 |
| EPI_ISL_1598072 |
| EPI_ISL_1598332 |
| EPI_ISL_1598343 |
| EPI_ISL_1597876 |
| EPI_ISL_1598084 |
| EPI_ISL_1597944 |
| EPI_ISL_1598350 |
| EPI_ISL_1598347 |
| EPI_ISL_1598335 |
| EPI_ISL_1597964 |
| EPI_ISL_1598334 |
| EPI_ISL_1598685 |
| EPI_ISL_1597986 |
| EPI_ISL_1598984 |

|                 |
|-----------------|
| EPI_ISL_1496036 |
| EPI_ISL_1496300 |
| EPI_ISL_1496267 |
| EPI_ISL_1496124 |
| EPI_ISL_1658369 |
| EPI_ISL_1658370 |
| EPI_ISL_1658371 |
| EPI_ISL_1658368 |
| EPI_ISL_2375198 |
| EPI_ISL_1658185 |
| EPI_ISL_1657950 |
| EPI_ISL_1657960 |
| EPI_ISL_1657962 |
| EPI_ISL_1657951 |
| EPI_ISL_1658241 |
| EPI_ISL_1657961 |
| EPI_ISL_1657958 |
| EPI_ISL_1658372 |
| EPI_ISL_1657948 |

|                 |
|-----------------|
| EPI_ISL_1657955 |
| EPI_ISL_1657959 |
| EPI_ISL_1657963 |
| EPI_ISL_1682589 |
| EPI_ISL_1682586 |
| EPI_ISL_1682594 |
| EPI_ISL_1682601 |
| EPI_ISL_1682600 |
| EPI_ISL_1682585 |
| EPI_ISL_1682598 |
| EPI_ISL_1682597 |
| EPI_ISL_1682595 |
| EPI_ISL_1682592 |
| EPI_ISL_1682591 |
| EPI_ISL_1682588 |
| EPI_ISL_1598339 |
| EPI_ISL_1598636 |
| EPI_ISL_1598345 |
| EPI_ISL_1598333 |

|                 |
|-----------------|
| EPI_ISL_1598799 |
| EPI_ISL_1598330 |
| EPI_ISL_1598336 |
| EPI_ISL_1598342 |
| EPI_ISL_1598638 |
| EPI_ISL_1598352 |
| EPI_ISL_1598340 |
| EPI_ISL_1598759 |
| EPI_ISL_1598348 |
| EPI_ISL_1598982 |
| EPI_ISL_1598353 |
| EPI_ISL_1914271 |
| EPI_ISL_1657956 |
| EPI_ISL_1658297 |
| EPI_ISL_1657949 |
| EPI_ISL_1658214 |
| EPI_ISL_1657953 |
| EPI_ISL_1657957 |
| EPI_ISL_1658235 |

|                 |
|-----------------|
| EPI_ISL_1657954 |
| EPI_ISL_1657952 |
| EPI_ISL_1658512 |
| EPI_ISL_1659338 |
| EPI_ISL_1658458 |
| EPI_ISL_1658523 |
| EPI_ISL_1658469 |
| EPI_ISL_1658485 |
| EPI_ISL_1658652 |
| EPI_ISL_1658539 |
| EPI_ISL_1658856 |
| EPI_ISL_1658852 |
| EPI_ISL_1658862 |
| EPI_ISL_1658854 |
| EPI_ISL_1658866 |
| EPI_ISL_1658865 |
| EPI_ISL_1658554 |
| EPI_ISL_1658861 |
| EPI_ISL_1658853 |

|                 |
|-----------------|
| EPI_ISL_1658857 |
| EPI_ISL_1658533 |
| EPI_ISL_1659339 |
| EPI_ISL_1659336 |
| EPI_ISL_1659337 |
| EPI_ISL_1659340 |
| EPI_ISL_1659155 |
| EPI_ISL_1659335 |
| EPI_ISL_1658851 |
| EPI_ISL_1658860 |
| EPI_ISL_1658850 |
| EPI_ISL_1658863 |
| EPI_ISL_1658859 |
| EPI_ISL_1658858 |
| EPI_ISL_1658855 |
| EPI_ISL_1658867 |
| EPI_ISL_1658864 |
| EPI_ISL_1750037 |
| EPI_ISL_1750029 |

|                 |
|-----------------|
| EPI_ISL_1750040 |
| EPI_ISL_1750580 |
| EPI_ISL_1750028 |
| EPI_ISL_1749692 |
| EPI_ISL_1750025 |
| EPI_ISL_1750043 |
| EPI_ISL_1749794 |
| EPI_ISL_1750875 |
| EPI_ISL_1750770 |
| EPI_ISL_1750886 |
| EPI_ISL_1749783 |
| EPI_ISL_1750826 |
| EPI_ISL_1749750 |
| EPI_ISL_1750621 |
| EPI_ISL_1750027 |
| EPI_ISL_1750515 |
| EPI_ISL_1749974 |
| EPI_ISL_1750513 |
| EPI_ISL_1749903 |

|                 |
|-----------------|
| EPI_ISL_1750569 |
| EPI_ISL_1750038 |
| EPI_ISL_1750030 |
| EPI_ISL_1750042 |
| EPI_ISL_1750419 |
| EPI_ISL_1750026 |
| EPI_ISL_1913595 |
| EPI_ISL_1750420 |
| EPI_ISL_1750516 |
| EPI_ISL_1750032 |
| EPI_ISL_1750033 |
| EPI_ISL_1750034 |
| EPI_ISL_1750041 |
| EPI_ISL_1750035 |
| EPI_ISL_1750677 |
| EPI_ISL_1913605 |
| EPI_ISL_1913601 |
| EPI_ISL_1914162 |
| EPI_ISL_1913613 |

|                 |
|-----------------|
| EPI_ISL_1913616 |
| EPI_ISL_1913271 |
| EPI_ISL_1913596 |
| EPI_ISL_1913608 |
| EPI_ISL_1913619 |
| EPI_ISL_1913606 |
| EPI_ISL_1913618 |
| EPI_ISL_1913958 |
| EPI_ISL_1913918 |
| EPI_ISL_1913730 |
| EPI_ISL_1913630 |
| EPI_ISL_1914101 |
| EPI_ISL_1913870 |
| EPI_ISL_1913291 |
| EPI_ISL_1914045 |
| EPI_ISL_1913783 |
| EPI_ISL_1913335 |
| EPI_ISL_1913294 |
| EPI_ISL_1914052 |

|                 |
|-----------------|
| EPI_ISL_1913311 |
| EPI_ISL_1914142 |
| EPI_ISL_1913784 |
| EPI_ISL_1913825 |
| EPI_ISL_1913740 |
| EPI_ISL_1913437 |
| EPI_ISL_1913637 |
| EPI_ISL_1913624 |
| EPI_ISL_1913612 |
| EPI_ISL_1914224 |
| EPI_ISL_1913611 |
| EPI_ISL_1913319 |
| EPI_ISL_1913593 |
| EPI_ISL_1913975 |
| EPI_ISL_1914238 |
| EPI_ISL_1913610 |
| EPI_ISL_1914134 |
| EPI_ISL_1914135 |
| EPI_ISL_1913594 |

|                 |
|-----------------|
| EPI_ISL_1913625 |
| EPI_ISL_1913974 |
| EPI_ISL_1913623 |
| EPI_ISL_1913341 |
| EPI_ISL_1913970 |
| EPI_ISL_1913622 |
| EPI_ISL_1913614 |
| EPI_ISL_1913589 |
| EPI_ISL_1913301 |
| EPI_ISL_1913602 |
| EPI_ISL_1913285 |
| EPI_ISL_1913591 |
| EPI_ISL_1913971 |
| EPI_ISL_1913331 |
| EPI_ISL_1913320 |
| EPI_ISL_1913603 |
| EPI_ISL_1913604 |
| EPI_ISL_1914165 |
| EPI_ISL_1913609 |

|                 |
|-----------------|
| EPI_ISL_2017012 |
| EPI_ISL_2017007 |
| EPI_ISL_2017176 |
| EPI_ISL_2017135 |
| EPI_ISL_2017002 |
| EPI_ISL_2017005 |
| EPI_ISL_2017004 |
| EPI_ISL_2017011 |
| EPI_ISL_2017006 |
| EPI_ISL_2016859 |
| EPI_ISL_2017003 |
| EPI_ISL_2017008 |
| EPI_ISL_2017234 |
| EPI_ISL_2017010 |
| EPI_ISL_2017009 |
| EPI_ISL_2017226 |
| EPI_ISL_2019300 |
| EPI_ISL_2019274 |
| EPI_ISL_2019339 |

|                 |
|-----------------|
| EPI_ISL_2019122 |
| EPI_ISL_2019109 |
| EPI_ISL_2019240 |
| EPI_ISL_2019006 |
| EPI_ISL_2019310 |
| EPI_ISL_2019456 |
| EPI_ISL_2019267 |
| EPI_ISL_2018995 |
| EPI_ISL_2018968 |
| EPI_ISL_2019164 |
| EPI_ISL_2019404 |
| EPI_ISL_2019428 |
| EPI_ISL_2019493 |
| EPI_ISL_2019528 |
| EPI_ISL_2019068 |
| EPI_ISL_2019136 |
| EPI_ISL_2019377 |
| EPI_ISL_2307687 |
| EPI_ISL_2308067 |



|                 |
|-----------------|
| EPI_ISL_2307897 |
| EPI_ISL_2307615 |
| EPI_ISL_2019195 |
| EPI_ISL_2307644 |
| EPI_ISL_2308015 |
| EPI_ISL_2307781 |
| EPI_ISL_2307630 |
| EPI_ISL_2019216 |
| EPI_ISL_2019420 |
| EPI_ISL_2019219 |
| EPI_ISL_2211975 |
| EPI_ISL_2212341 |
| EPI_ISL_2212435 |
| EPI_ISL_2211980 |
| EPI_ISL_2212009 |
| EPI_ISL_2212759 |
| EPI_ISL_2212734 |
| EPI_ISL_2212023 |
| EPI_ISL_2211990 |

|                 |
|-----------------|
| EPI_ISL_2212000 |
| EPI_ISL_2212622 |
| EPI_ISL_2212020 |
| EPI_ISL_2212618 |
| EPI_ISL_2211613 |
| EPI_ISL_2211611 |
| EPI_ISL_2212441 |
| EPI_ISL_2212004 |
| EPI_ISL_2212443 |
| EPI_ISL_2211986 |
| EPI_ISL_2212014 |
| EPI_ISL_2211994 |
| EPI_ISL_2151962 |
| EPI_ISL_2152049 |
| EPI_ISL_2152344 |
| EPI_ISL_2152216 |
| EPI_ISL_2152052 |
| EPI_ISL_2151958 |
| EPI_ISL_2152305 |

|                 |
|-----------------|
| EPI_ISL_2151944 |
| EPI_ISL_2152002 |
| EPI_ISL_2152356 |
| EPI_ISL_2152078 |
| EPI_ISL_2152226 |
| EPI_ISL_2151945 |
| EPI_ISL_2152171 |
| EPI_ISL_2151930 |
| EPI_ISL_2152209 |
| EPI_ISL_2152195 |
| EPI_ISL_2151960 |
| EPI_ISL_2152062 |
| EPI_ISL_2152249 |
| EPI_ISL_2152114 |
| EPI_ISL_2307737 |
| EPI_ISL_2307740 |
| EPI_ISL_2307734 |
| EPI_ISL_2307744 |
| EPI_ISL_2375486 |

|                 |
|-----------------|
| EPI_ISL_2307743 |
| EPI_ISL_2307745 |
| EPI_ISL_2307749 |
| EPI_ISL_2307735 |
| EPI_ISL_2307727 |
| EPI_ISL_2307738 |
| EPI_ISL_2307779 |
| EPI_ISL_2307544 |
| EPI_ISL_2308018 |
| EPI_ISL_2307812 |
| EPI_ISL_2307953 |
| EPI_ISL_2308047 |
| EPI_ISL_2307878 |
| EPI_ISL_2375206 |
| EPI_ISL_2375208 |
| EPI_ISL_2375207 |
| EPI_ISL_2375214 |
| EPI_ISL_2375213 |
| EPI_ISL_2375201 |

|                 |
|-----------------|
| EPI_ISL_2375203 |
| EPI_ISL_2375205 |
| EPI_ISL_2375211 |
| EPI_ISL_2375197 |
| EPI_ISL_2375212 |
| EPI_ISL_2375204 |
| EPI_ISL_2375210 |
| EPI_ISL_2375199 |
| EPI_ISL_2662355 |
| EPI_ISL_2375194 |
| EPI_ISL_2375329 |
| EPI_ISL_2375129 |
| EPI_ISL_2375326 |
| EPI_ISL_2375351 |
| EPI_ISL_2375108 |
| EPI_ISL_2462658 |
| EPI_ISL_2462656 |
| EPI_ISL_2462659 |
| EPI_ISL_2544386 |

|                 |
|-----------------|
| EPI_ISL_2544390 |
| EPI_ISL_2544385 |
| EPI_ISL_2544389 |
| EPI_ISL_2544387 |
| EPI_ISL_2544384 |
| EPI_ISL_2544388 |
| EPI_ISL_2611071 |
| EPI_ISL_2724425 |
| EPI_ISL_2662356 |
| EPI_ISL_2662353 |
| EPI_ISL_2662354 |
| EPI_ISL_2820573 |
| EPI_ISL_3854240 |
| EPI_ISL_3854260 |
| EPI_ISL_3854255 |
| EPI_ISL_3854258 |
| EPI_ISL_4630567 |
| EPI_ISL_4634131 |
| EPI_ISL_1388991 |

|                 |
|-----------------|
| EPI_ISL_910325  |
| EPI_ISL_3344127 |
| EPI_ISL_3344126 |
| EPI_ISL_1388564 |
| EPI_ISL_1388375 |
| EPI_ISL_1388920 |
| EPI_ISL_1388858 |
| EPI_ISL_1388875 |
| EPI_ISL_1388877 |
| EPI_ISL_1388202 |
| EPI_ISL_1388854 |
| EPI_ISL_1388856 |
| EPI_ISL_1388881 |
| EPI_ISL_1388228 |
| EPI_ISL_1388251 |
| EPI_ISL_1388193 |
| EPI_ISL_1388883 |
| EPI_ISL_1388885 |
| EPI_ISL_1388887 |

|                 |
|-----------------|
| EPI_ISL_1388889 |
| EPI_ISL_1388892 |
| EPI_ISL_1388238 |
| EPI_ISL_1389060 |
| EPI_ISL_1388562 |
| EPI_ISL_1388124 |
| EPI_ISL_1388568 |
| EPI_ISL_1389049 |
| EPI_ISL_2918756 |
| EPI_ISL_527916  |
| EPI_ISL_527920  |
| EPI_ISL_527922  |
| EPI_ISL_527923  |
| EPI_ISL_527924  |
| EPI_ISL_527925  |
| EPI_ISL_418281  |
| EPI_ISL_527927  |
| EPI_ISL_527928  |
| EPI_ISL_527930  |

|                |
|----------------|
| EPI_ISL_527931 |
| EPI_ISL_527932 |
| EPI_ISL_527933 |
| EPI_ISL_527934 |
| EPI_ISL_527935 |
| EPI_ISL_527938 |
| EPI_ISL_527941 |
| EPI_ISL_527942 |
| EPI_ISL_527943 |
| EPI_ISL_527944 |
| EPI_ISL_527951 |
| EPI_ISL_527952 |
| EPI_ISL_527953 |
| EPI_ISL_527954 |
| EPI_ISL_527955 |
| EPI_ISL_527956 |
| EPI_ISL_527957 |
| EPI_ISL_527959 |
| EPI_ISL_527961 |

|                |
|----------------|
| EPI_ISL_527962 |
| EPI_ISL_527963 |
| EPI_ISL_527964 |
| EPI_ISL_527965 |
| EPI_ISL_527966 |
| EPI_ISL_527967 |
| EPI_ISL_527968 |
| EPI_ISL_527969 |
| EPI_ISL_527970 |
| EPI_ISL_527972 |
| EPI_ISL_527973 |
| EPI_ISL_527974 |
| EPI_ISL_527975 |
| EPI_ISL_527977 |
| EPI_ISL_527978 |
| EPI_ISL_527979 |
| EPI_ISL_527980 |
| EPI_ISL_527981 |
| EPI_ISL_527982 |

|                |
|----------------|
| EPI_ISL_527983 |
| EPI_ISL_527985 |
| EPI_ISL_527986 |
| EPI_ISL_527987 |
| EPI_ISL_527988 |
| EPI_ISL_527989 |
| EPI_ISL_530122 |
| EPI_ISL_527991 |
| EPI_ISL_527992 |
| EPI_ISL_527995 |
| EPI_ISL_527996 |
| EPI_ISL_528001 |
| EPI_ISL_528003 |
| EPI_ISL_528004 |
| EPI_ISL_528005 |
| EPI_ISL_528007 |
| EPI_ISL_528008 |
| EPI_ISL_528009 |
| EPI_ISL_528010 |

|                |
|----------------|
| EPI_ISL_528014 |
| EPI_ISL_528016 |
| EPI_ISL_528017 |
| EPI_ISL_528018 |
| EPI_ISL_528019 |
| EPI_ISL_528020 |
| EPI_ISL_528021 |
| EPI_ISL_528022 |
| EPI_ISL_528024 |
| EPI_ISL_528026 |
| EPI_ISL_528028 |
| EPI_ISL_528029 |
| EPI_ISL_528031 |
| EPI_ISL_528033 |
| EPI_ISL_528034 |
| EPI_ISL_528035 |
| EPI_ISL_528036 |
| EPI_ISL_528037 |
| EPI_ISL_528039 |

|                |
|----------------|
| EPI_ISL_528041 |
| EPI_ISL_528042 |
| EPI_ISL_528044 |
| EPI_ISL_528046 |
| EPI_ISL_528047 |
| EPI_ISL_528052 |
| EPI_ISL_528054 |
| EPI_ISL_528057 |
| EPI_ISL_528058 |
| EPI_ISL_528059 |
| EPI_ISL_528060 |
| EPI_ISL_528063 |
| EPI_ISL_528066 |
| EPI_ISL_528067 |
| EPI_ISL_528068 |
| EPI_ISL_528069 |
| EPI_ISL_528070 |
| EPI_ISL_528071 |
| EPI_ISL_528074 |

|                |
|----------------|
| EPI_ISL_528075 |
| EPI_ISL_528076 |
| EPI_ISL_528078 |
| EPI_ISL_528080 |
| EPI_ISL_528081 |
| EPI_ISL_528082 |
| EPI_ISL_528083 |
| EPI_ISL_528085 |
| EPI_ISL_528087 |
| EPI_ISL_528089 |
| EPI_ISL_528091 |
| EPI_ISL_528092 |
| EPI_ISL_528093 |
| EPI_ISL_528094 |
| EPI_ISL_528096 |
| EPI_ISL_528097 |
| EPI_ISL_528098 |
| EPI_ISL_528105 |
| EPI_ISL_528111 |

|                |
|----------------|
| EPI_ISL_528112 |
| EPI_ISL_528114 |
| EPI_ISL_528115 |
| EPI_ISL_528116 |
| EPI_ISL_528118 |
| EPI_ISL_528119 |
| EPI_ISL_528120 |
| EPI_ISL_528121 |
| EPI_ISL_528123 |
| EPI_ISL_528124 |
| EPI_ISL_528127 |
| EPI_ISL_528128 |
| EPI_ISL_528129 |
| EPI_ISL_528132 |
| EPI_ISL_528134 |
| EPI_ISL_528136 |
| EPI_ISL_528138 |
| EPI_ISL_528140 |
| EPI_ISL_528141 |

|                |
|----------------|
| EPI_ISL_528142 |
| EPI_ISL_528143 |
| EPI_ISL_528145 |
| EPI_ISL_528148 |
| EPI_ISL_528149 |
| EPI_ISL_528150 |
| EPI_ISL_528151 |
| EPI_ISL_528156 |
| EPI_ISL_528159 |
| EPI_ISL_528160 |
| EPI_ISL_528163 |
| EPI_ISL_528164 |
| EPI_ISL_528165 |
| EPI_ISL_528166 |
| EPI_ISL_528167 |
| EPI_ISL_528168 |
| EPI_ISL_528171 |
| EPI_ISL_528174 |
| EPI_ISL_528178 |

|                |
|----------------|
| EPI_ISL_528181 |
| EPI_ISL_528182 |
| EPI_ISL_528183 |
| EPI_ISL_528185 |
| EPI_ISL_528186 |
| EPI_ISL_528187 |
| EPI_ISL_528189 |
| EPI_ISL_528190 |
| EPI_ISL_528191 |
| EPI_ISL_528194 |
| EPI_ISL_528195 |
| EPI_ISL_528196 |
| EPI_ISL_528198 |
| EPI_ISL_528200 |
| EPI_ISL_528202 |
| EPI_ISL_528204 |
| EPI_ISL_528205 |
| EPI_ISL_528206 |
| EPI_ISL_528207 |

|                |
|----------------|
| EPI_ISL_528209 |
| EPI_ISL_528213 |
| EPI_ISL_528214 |
| EPI_ISL_528216 |
| EPI_ISL_528217 |
| EPI_ISL_528218 |
| EPI_ISL_528220 |
| EPI_ISL_528221 |
| EPI_ISL_528222 |
| EPI_ISL_528223 |
| EPI_ISL_528227 |
| EPI_ISL_528228 |
| EPI_ISL_528229 |
| EPI_ISL_528230 |
| EPI_ISL_528232 |
| EPI_ISL_528233 |
| EPI_ISL_528234 |
| EPI_ISL_528235 |
| EPI_ISL_528236 |

|                |
|----------------|
| EPI_ISL_528237 |
| EPI_ISL_528238 |
| EPI_ISL_528239 |
| EPI_ISL_528240 |
| EPI_ISL_528241 |
| EPI_ISL_528242 |
| EPI_ISL_528243 |
| EPI_ISL_528244 |
| EPI_ISL_528245 |
| EPI_ISL_528247 |
| EPI_ISL_528248 |
| EPI_ISL_528249 |
| EPI_ISL_528250 |
| EPI_ISL_528251 |
| EPI_ISL_528252 |
| EPI_ISL_528253 |
| EPI_ISL_528254 |
| EPI_ISL_581716 |
| EPI_ISL_528255 |

|                |
|----------------|
| EPI_ISL_528256 |
| EPI_ISL_528257 |
| EPI_ISL_528258 |
| EPI_ISL_528259 |
| EPI_ISL_528260 |
| EPI_ISL_528261 |
| EPI_ISL_528262 |
| EPI_ISL_528263 |
| EPI_ISL_528264 |
| EPI_ISL_528268 |
| EPI_ISL_528269 |
| EPI_ISL_528270 |
| EPI_ISL_528271 |
| EPI_ISL_528272 |
| EPI_ISL_528273 |
| EPI_ISL_528274 |
| EPI_ISL_528275 |
| EPI_ISL_528276 |
| EPI_ISL_528277 |

|                |
|----------------|
| EPI_ISL_528278 |
| EPI_ISL_528280 |
| EPI_ISL_528281 |
| EPI_ISL_528282 |
| EPI_ISL_528283 |
| EPI_ISL_528284 |
| EPI_ISL_528285 |
| EPI_ISL_528286 |
| EPI_ISL_528287 |
| EPI_ISL_528288 |
| EPI_ISL_530123 |
| EPI_ISL_528290 |
| EPI_ISL_528291 |
| EPI_ISL_528292 |
| EPI_ISL_528293 |
| EPI_ISL_528294 |
| EPI_ISL_528295 |
| EPI_ISL_528296 |
| EPI_ISL_528297 |

|                |
|----------------|
| EPI_ISL_528298 |
| EPI_ISL_528299 |
| EPI_ISL_528302 |
| EPI_ISL_528303 |
| EPI_ISL_528304 |
| EPI_ISL_528305 |
| EPI_ISL_528307 |
| EPI_ISL_528309 |
| EPI_ISL_528310 |
| EPI_ISL_528311 |
| EPI_ISL_528312 |
| EPI_ISL_528314 |
| EPI_ISL_528315 |
| EPI_ISL_528316 |
| EPI_ISL_528317 |
| EPI_ISL_528318 |
| EPI_ISL_581722 |
| EPI_ISL_528319 |
| EPI_ISL_528320 |

|                |
|----------------|
| EPI_ISL_528323 |
| EPI_ISL_528325 |
| EPI_ISL_528326 |
| EPI_ISL_528327 |
| EPI_ISL_528330 |
| EPI_ISL_528331 |
| EPI_ISL_528332 |
| EPI_ISL_528333 |
| EPI_ISL_528334 |
| EPI_ISL_528335 |
| EPI_ISL_528336 |
| EPI_ISL_528337 |
| EPI_ISL_528339 |
| EPI_ISL_528340 |
| EPI_ISL_528341 |
| EPI_ISL_528342 |
| EPI_ISL_528343 |
| EPI_ISL_528344 |
| EPI_ISL_528345 |

|                |
|----------------|
| EPI_ISL_528346 |
| EPI_ISL_528347 |
| EPI_ISL_528348 |
| EPI_ISL_528349 |
| EPI_ISL_528350 |
| EPI_ISL_528351 |
| EPI_ISL_528354 |
| EPI_ISL_528355 |
| EPI_ISL_528356 |
| EPI_ISL_528357 |
| EPI_ISL_528358 |
| EPI_ISL_528359 |
| EPI_ISL_528360 |
| EPI_ISL_528361 |
| EPI_ISL_528362 |
| EPI_ISL_528363 |
| EPI_ISL_528364 |
| EPI_ISL_528365 |
| EPI_ISL_528366 |



|                 |
|-----------------|
| EPI_ISL_528367  |
| EPI_ISL_528369  |
| EPI_ISL_528370  |
| EPI_ISL_581736  |
| EPI_ISL_1388662 |
| EPI_ISL_528371  |
| EPI_ISL_1388750 |
| EPI_ISL_528372  |
| EPI_ISL_581728  |
| EPI_ISL_581729  |
| EPI_ISL_581730  |
| EPI_ISL_581731  |
| EPI_ISL_581783  |
| EPI_ISL_581737  |
| EPI_ISL_581732  |
| EPI_ISL_528373  |
| EPI_ISL_1388678 |
| EPI_ISL_581738  |
| EPI_ISL_581739  |

|                 |
|-----------------|
| EPI_ISL_581740  |
| EPI_ISL_581741  |
| EPI_ISL_1388188 |
| EPI_ISL_581784  |
| EPI_ISL_581742  |
| EPI_ISL_581744  |
| EPI_ISL_581745  |
| EPI_ISL_581747  |
| EPI_ISL_581786  |
| EPI_ISL_581749  |
| EPI_ISL_581750  |
| EPI_ISL_581787  |
| EPI_ISL_581788  |
| EPI_ISL_581751  |
| EPI_ISL_581789  |
| EPI_ISL_581790  |
| EPI_ISL_581753  |
| EPI_ISL_581754  |
| EPI_ISL_581792  |

|                |
|----------------|
| EPI_ISL_581756 |
| EPI_ISL_581757 |
| EPI_ISL_581758 |
| EPI_ISL_581760 |
| EPI_ISL_581793 |
| EPI_ISL_581761 |
| EPI_ISL_581762 |
| EPI_ISL_581763 |
| EPI_ISL_581794 |
| EPI_ISL_581795 |
| EPI_ISL_581796 |
| EPI_ISL_581764 |
| EPI_ISL_581767 |
| EPI_ISL_581769 |
| EPI_ISL_581797 |
| EPI_ISL_581772 |
| EPI_ISL_581773 |
| EPI_ISL_581774 |
| EPI_ISL_581775 |

|                 |
|-----------------|
| EPI_ISL_581776  |
| EPI_ISL_581777  |
| EPI_ISL_581778  |
| EPI_ISL_581779  |
| EPI_ISL_581781  |
| EPI_ISL_1388751 |
| EPI_ISL_581799  |
| EPI_ISL_581801  |
| EPI_ISL_581803  |
| EPI_ISL_581804  |
| EPI_ISL_581805  |
| EPI_ISL_581806  |
| EPI_ISL_581807  |
| EPI_ISL_581808  |
| EPI_ISL_581809  |
| EPI_ISL_581810  |
| EPI_ISL_581811  |
| EPI_ISL_581812  |
| EPI_ISL_581668  |

|                |
|----------------|
| EPI_ISL_581669 |
| EPI_ISL_581670 |
| EPI_ISL_581814 |
| EPI_ISL_581671 |
| EPI_ISL_581672 |
| EPI_ISL_581673 |
| EPI_ISL_581815 |
| EPI_ISL_581674 |
| EPI_ISL_581816 |
| EPI_ISL_581675 |
| EPI_ISL_581676 |
| EPI_ISL_581677 |
| EPI_ISL_581817 |
| EPI_ISL_581818 |
| EPI_ISL_581819 |
| EPI_ISL_581820 |
| EPI_ISL_581821 |
| EPI_ISL_581822 |
| EPI_ISL_581824 |

|                 |
|-----------------|
| EPI_ISL_581825  |
| EPI_ISL_581828  |
| EPI_ISL_581829  |
| EPI_ISL_581830  |
| EPI_ISL_581831  |
| EPI_ISL_581832  |
| EPI_ISL_1388753 |
| EPI_ISL_581835  |
| EPI_ISL_581836  |
| EPI_ISL_581837  |
| EPI_ISL_581838  |
| EPI_ISL_581839  |
| EPI_ISL_581840  |
| EPI_ISL_581841  |
| EPI_ISL_581842  |
| EPI_ISL_581843  |
| EPI_ISL_581844  |
| EPI_ISL_581845  |
| EPI_ISL_581848  |

|                |
|----------------|
| EPI_ISL_581849 |
| EPI_ISL_581850 |
| EPI_ISL_581851 |
| EPI_ISL_581852 |
| EPI_ISL_581853 |
| EPI_ISL_581679 |
| EPI_ISL_581854 |
| EPI_ISL_581855 |
| EPI_ISL_581856 |
| EPI_ISL_581857 |
| EPI_ISL_581858 |
| EPI_ISL_581859 |
| EPI_ISL_581860 |
| EPI_ISL_581861 |
| EPI_ISL_581862 |
| EPI_ISL_581863 |
| EPI_ISL_581864 |
| EPI_ISL_581866 |
| EPI_ISL_581867 |

|                |
|----------------|
| EPI_ISL_581868 |
| EPI_ISL_581681 |
| EPI_ISL_581682 |
| EPI_ISL_581683 |
| EPI_ISL_581687 |
| EPI_ISL_581688 |
| EPI_ISL_581690 |
| EPI_ISL_581692 |
| EPI_ISL_581693 |
| EPI_ISL_581694 |
| EPI_ISL_581695 |
| EPI_ISL_581696 |
| EPI_ISL_581698 |
| EPI_ISL_581699 |
| EPI_ISL_581700 |
| EPI_ISL_581702 |
| EPI_ISL_581703 |
| EPI_ISL_581704 |
| EPI_ISL_581705 |

|                 |
|-----------------|
| EPI_ISL_581706  |
| EPI_ISL_1388748 |
| EPI_ISL_581707  |
| EPI_ISL_581708  |
| EPI_ISL_581709  |
| EPI_ISL_581710  |
| EPI_ISL_581711  |
| EPI_ISL_581713  |
| EPI_ISL_581715  |
| EPI_ISL_581916  |
| EPI_ISL_581917  |
| EPI_ISL_581919  |
| EPI_ISL_581920  |
| EPI_ISL_1388755 |
| EPI_ISL_581921  |
| EPI_ISL_581922  |
| EPI_ISL_581923  |
| EPI_ISL_581925  |
| EPI_ISL_581926  |

|                |
|----------------|
| EPI_ISL_581927 |
| EPI_ISL_581928 |
| EPI_ISL_581874 |
| EPI_ISL_581891 |
| EPI_ISL_581908 |
| EPI_ISL_581892 |
| EPI_ISL_581893 |
| EPI_ISL_581894 |
| EPI_ISL_581895 |
| EPI_ISL_581897 |
| EPI_ISL_581877 |
| EPI_ISL_581898 |
| EPI_ISL_581878 |
| EPI_ISL_581879 |
| EPI_ISL_581880 |
| EPI_ISL_581881 |
| EPI_ISL_581882 |
| EPI_ISL_581899 |
| EPI_ISL_581883 |

|                 |
|-----------------|
| EPI_ISL_581884  |
| EPI_ISL_581900  |
| EPI_ISL_581885  |
| EPI_ISL_581901  |
| EPI_ISL_581886  |
| EPI_ISL_581902  |
| EPI_ISL_581887  |
| EPI_ISL_581888  |
| EPI_ISL_581889  |
| EPI_ISL_581909  |
| EPI_ISL_581910  |
| EPI_ISL_1388119 |
| EPI_ISL_581911  |
| EPI_ISL_581912  |
| EPI_ISL_581913  |
| EPI_ISL_581930  |
| EPI_ISL_581931  |
| EPI_ISL_581932  |
| EPI_ISL_581933  |

|                |
|----------------|
| EPI_ISL_581934 |
| EPI_ISL_581935 |
| EPI_ISL_581936 |
| EPI_ISL_581937 |
| EPI_ISL_581940 |
| EPI_ISL_581941 |
| EPI_ISL_581942 |
| EPI_ISL_581943 |
| EPI_ISL_581944 |
| EPI_ISL_581945 |
| EPI_ISL_581946 |
| EPI_ISL_581947 |
| EPI_ISL_581948 |
| EPI_ISL_581949 |
| EPI_ISL_581950 |
| EPI_ISL_581951 |
| EPI_ISL_581952 |
| EPI_ISL_581953 |
| EPI_ISL_581954 |

|                 |
|-----------------|
| EPI_ISL_581955  |
| EPI_ISL_581956  |
| EPI_ISL_581957  |
| EPI_ISL_581958  |
| EPI_ISL_581964  |
| EPI_ISL_581965  |
| EPI_ISL_581966  |
| EPI_ISL_581967  |
| EPI_ISL_581968  |
| EPI_ISL_581969  |
| EPI_ISL_581970  |
| EPI_ISL_581971  |
| EPI_ISL_581972  |
| EPI_ISL_581973  |
| EPI_ISL_581974  |
| EPI_ISL_1388257 |
| EPI_ISL_581975  |
| EPI_ISL_581976  |
| EPI_ISL_581978  |

|                |
|----------------|
| EPI_ISL_581979 |
| EPI_ISL_581980 |
| EPI_ISL_581981 |
| EPI_ISL_581982 |
| EPI_ISL_581983 |
| EPI_ISL_581984 |
| EPI_ISL_581986 |
| EPI_ISL_581987 |
| EPI_ISL_581988 |
| EPI_ISL_581989 |
| EPI_ISL_581990 |
| EPI_ISL_581991 |
| EPI_ISL_581992 |
| EPI_ISL_581993 |
| EPI_ISL_581994 |
| EPI_ISL_581995 |
| EPI_ISL_581996 |
| EPI_ISL_581997 |
| EPI_ISL_581998 |

|                |
|----------------|
| EPI_ISL_581999 |
| EPI_ISL_830985 |
| EPI_ISL_830740 |
| EPI_ISL_830779 |
| EPI_ISL_830780 |
| EPI_ISL_830781 |
| EPI_ISL_830782 |
| EPI_ISL_830783 |
| EPI_ISL_830784 |
| EPI_ISL_830785 |
| EPI_ISL_830786 |
| EPI_ISL_830986 |
| EPI_ISL_830787 |
| EPI_ISL_830788 |
| EPI_ISL_830789 |
| EPI_ISL_830790 |
| EPI_ISL_830791 |
| EPI_ISL_830792 |
| EPI_ISL_830793 |

|                |
|----------------|
| EPI_ISL_830794 |
| EPI_ISL_830795 |
| EPI_ISL_830796 |
| EPI_ISL_830797 |
| EPI_ISL_830798 |
| EPI_ISL_830987 |
| EPI_ISL_830988 |
| EPI_ISL_830799 |
| EPI_ISL_830800 |
| EPI_ISL_830801 |
| EPI_ISL_830802 |
| EPI_ISL_830803 |
| EPI_ISL_830804 |
| EPI_ISL_830805 |
| EPI_ISL_830806 |
| EPI_ISL_830807 |
| EPI_ISL_830808 |
| EPI_ISL_830809 |
| EPI_ISL_830810 |

|                 |
|-----------------|
| EPI_ISL_830811  |
| EPI_ISL_830812  |
| EPI_ISL_830813  |
| EPI_ISL_830989  |
| EPI_ISL_830814  |
| EPI_ISL_830815  |
| EPI_ISL_830816  |
| EPI_ISL_830817  |
| EPI_ISL_830818  |
| EPI_ISL_830819  |
| EPI_ISL_830820  |
| EPI_ISL_830821  |
| EPI_ISL_830822  |
| EPI_ISL_830745  |
| EPI_ISL_830768  |
| EPI_ISL_830771  |
| EPI_ISL_1388116 |
| EPI_ISL_1388757 |
| EPI_ISL_1388759 |

|                 |
|-----------------|
| EPI_ISL_1388761 |
| EPI_ISL_1388765 |
| EPI_ISL_1388767 |
| EPI_ISL_1388769 |
| EPI_ISL_1388295 |
| EPI_ISL_1388771 |
| EPI_ISL_1388320 |
| EPI_ISL_1388773 |
| EPI_ISL_1388285 |
| EPI_ISL_1388300 |
| EPI_ISL_1388774 |
| EPI_ISL_1388776 |
| EPI_ISL_1388699 |
| EPI_ISL_1388778 |
| EPI_ISL_1388780 |
| EPI_ISL_1388310 |
| EPI_ISL_1388781 |
| EPI_ISL_1388783 |
| EPI_ISL_1388226 |

|                 |
|-----------------|
| EPI_ISL_1388304 |
| EPI_ISL_1388787 |
| EPI_ISL_1388199 |
| EPI_ISL_1388789 |
| EPI_ISL_1388791 |
| EPI_ISL_1388795 |
| EPI_ISL_1388797 |
| EPI_ISL_1388799 |
| EPI_ISL_1388324 |
| EPI_ISL_1388326 |
| EPI_ISL_1388232 |
| EPI_ISL_1388322 |
| EPI_ISL_949186  |
| EPI_ISL_949189  |
| EPI_ISL_931157  |
| EPI_ISL_1388978 |
| EPI_ISL_1388110 |
| EPI_ISL_1388210 |
| EPI_ISL_1389051 |

|                 |
|-----------------|
| EPI_ISL_1388234 |
| EPI_ISL_1388969 |
| EPI_ISL_1388235 |
| EPI_ISL_1388972 |
| EPI_ISL_1388691 |
| EPI_ISL_1388976 |
| EPI_ISL_1388977 |
| EPI_ISL_1388975 |
| EPI_ISL_1388973 |
| EPI_ISL_1388982 |
| EPI_ISL_1388984 |
| EPI_ISL_1388980 |
| EPI_ISL_1388922 |
| EPI_ISL_1388924 |
| EPI_ISL_1388986 |
| EPI_ISL_1389121 |
| EPI_ISL_1388985 |
| EPI_ISL_1388247 |
| EPI_ISL_1388926 |

|                 |
|-----------------|
| EPI_ISL_1388249 |
| EPI_ISL_1388685 |
| EPI_ISL_1388244 |
| EPI_ISL_1388928 |
| EPI_ISL_1388995 |
| EPI_ISL_1388671 |
| EPI_ISL_1389016 |
| EPI_ISL_1389014 |
| EPI_ISL_1388277 |
| EPI_ISL_1388935 |
| EPI_ISL_1388936 |
| EPI_ISL_1388997 |
| EPI_ISL_1388214 |
| EPI_ISL_1389006 |
| EPI_ISL_1388868 |
| EPI_ISL_1388869 |
| EPI_ISL_1388996 |
| EPI_ISL_1388999 |
| EPI_ISL_1389011 |

|                 |
|-----------------|
| EPI_ISL_1388993 |
| EPI_ISL_1388992 |
| EPI_ISL_1389007 |
| EPI_ISL_1388301 |
| EPI_ISL_1389009 |
| EPI_ISL_1389013 |
| EPI_ISL_1388941 |
| EPI_ISL_1388283 |
| EPI_ISL_1388844 |
| EPI_ISL_1388136 |
| EPI_ISL_1388821 |
| EPI_ISL_1388639 |
| EPI_ISL_1388823 |
| EPI_ISL_1388825 |
| EPI_ISL_1388827 |
| EPI_ISL_1388829 |
| EPI_ISL_1388830 |
| EPI_ISL_1388834 |
| EPI_ISL_1388836 |

|                 |
|-----------------|
| EPI_ISL_1388838 |
| EPI_ISL_1388845 |
| EPI_ISL_1388850 |
| EPI_ISL_1388852 |
| EPI_ISL_1388961 |
| EPI_ISL_1388952 |
| EPI_ISL_1388959 |
| EPI_ISL_1388957 |
| EPI_ISL_1388962 |
| EPI_ISL_1388967 |
| EPI_ISL_1388966 |
| EPI_ISL_1388212 |
| EPI_ISL_1388956 |
| EPI_ISL_1388328 |
| EPI_ISL_1388222 |
| EPI_ISL_1388718 |
| EPI_ISL_1389018 |
| EPI_ISL_1388668 |
| EPI_ISL_1389024 |

|                 |
|-----------------|
| EPI_ISL_1389030 |
| EPI_ISL_1388128 |
| EPI_ISL_1388642 |
| EPI_ISL_1388944 |
| EPI_ISL_1388950 |
| EPI_ISL_1388726 |
| EPI_ISL_1388958 |
| EPI_ISL_1388955 |
| EPI_ISL_1388963 |
| EPI_ISL_1388242 |
| EPI_ISL_1388126 |
| EPI_ISL_1388195 |
| EPI_ISL_1388954 |
| EPI_ISL_1388968 |
| EPI_ISL_1388953 |
| EPI_ISL_1388330 |
| EPI_ISL_1388137 |
| EPI_ISL_1388631 |
| EPI_ISL_1388629 |



|                 |
|-----------------|
| EPI_ISL_1388965 |
| EPI_ISL_1388332 |
| EPI_ISL_1388160 |
| EPI_ISL_1388744 |
| EPI_ISL_1389123 |
| EPI_ISL_1389124 |
| EPI_ISL_1388293 |
| EPI_ISL_1389129 |
| EPI_ISL_1389131 |
| EPI_ISL_1388449 |
| EPI_ISL_1389133 |
| EPI_ISL_1388118 |
| EPI_ISL_1388149 |
| EPI_ISL_1388722 |
| EPI_ISL_1389061 |
| EPI_ISL_1388139 |
| EPI_ISL_1388179 |
| EPI_ISL_1388729 |
| EPI_ISL_1388731 |

|                 |
|-----------------|
| EPI_ISL_1388697 |
| EPI_ISL_1388175 |
| EPI_ISL_1388633 |
| EPI_ISL_1388177 |
| EPI_ISL_1388723 |
| EPI_ISL_1388733 |
| EPI_ISL_1388988 |
| EPI_ISL_1388989 |
| EPI_ISL_1388132 |
| EPI_ISL_1388466 |
| EPI_ISL_1388464 |
| EPI_ISL_1388652 |
| EPI_ISL_1388635 |
| EPI_ISL_1389023 |
| EPI_ISL_1388469 |
| EPI_ISL_1388550 |
| EPI_ISL_1389022 |
| EPI_ISL_1388460 |
| EPI_ISL_1389027 |

|                 |
|-----------------|
| EPI_ISL_1388358 |
| EPI_ISL_1389020 |
| EPI_ISL_1388141 |
| EPI_ISL_1388742 |
| EPI_ISL_1389045 |
| EPI_ISL_1388370 |
| EPI_ISL_1388154 |
| EPI_ISL_1389047 |
| EPI_ISL_1389029 |
| EPI_ISL_1389033 |
| EPI_ISL_1388471 |
| EPI_ISL_1388473 |
| EPI_ISL_1388183 |
| EPI_ISL_1389035 |
| EPI_ISL_1388291 |
| EPI_ISL_1388366 |
| EPI_ISL_1388552 |
| EPI_ISL_1388604 |
| EPI_ISL_1388740 |

|                 |
|-----------------|
| EPI_ISL_1389034 |
| EPI_ISL_1389037 |
| EPI_ISL_1389039 |
| EPI_ISL_1388476 |
| EPI_ISL_1388474 |
| EPI_ISL_1388259 |
| EPI_ISL_1389036 |
| EPI_ISL_1388532 |
| EPI_ISL_1389031 |
| EPI_ISL_1389032 |
| EPI_ISL_1388679 |
| EPI_ISL_1388579 |
| EPI_ISL_1389091 |
| EPI_ISL_1388501 |
| EPI_ISL_1388494 |
| EPI_ISL_1388499 |
| EPI_ISL_1388580 |
| EPI_ISL_1389089 |
| EPI_ISL_1388492 |

|                 |
|-----------------|
| EPI_ISL_1388576 |
| EPI_ISL_1388645 |
| EPI_ISL_1388388 |
| EPI_ISL_1389074 |
| EPI_ISL_1388644 |
| EPI_ISL_1388344 |
| EPI_ISL_1388156 |
| EPI_ISL_1388204 |
| EPI_ISL_1388390 |
| EPI_ISL_1389081 |
| EPI_ISL_1388346 |
| EPI_ISL_1389078 |
| EPI_ISL_1388504 |
| EPI_ISL_1389083 |
| EPI_ISL_1389087 |
| EPI_ISL_1388650 |
| EPI_ISL_1388396 |
| EPI_ISL_1388394 |
| EPI_ISL_1388392 |

|                 |
|-----------------|
| EPI_ISL_1388683 |
| EPI_ISL_1388281 |
| EPI_ISL_1389070 |
| EPI_ISL_1388306 |
| EPI_ISL_1388488 |
| EPI_ISL_1388312 |
| EPI_ISL_1388574 |
| EPI_ISL_1389065 |
| EPI_ISL_1388490 |
| EPI_ISL_1388267 |
| EPI_ISL_1389137 |
| EPI_ISL_1388145 |
| EPI_ISL_1388518 |
| EPI_ISL_1388158 |
| EPI_ISL_1389114 |
| EPI_ISL_1388318 |
| EPI_ISL_1389099 |
| EPI_ISL_1388455 |
| EPI_ISL_1388406 |

|                 |
|-----------------|
| EPI_ISL_1388397 |
| EPI_ISL_1388507 |
| EPI_ISL_1388520 |
| EPI_ISL_1388522 |
| EPI_ISL_1388400 |
| EPI_ISL_1388524 |
| EPI_ISL_1388514 |
| EPI_ISL_1388585 |
| EPI_ISL_1388509 |
| EPI_ISL_1388511 |
| EPI_ISL_1388526 |
| EPI_ISL_1389085 |
| EPI_ISL_1388143 |
| EPI_ISL_1388402 |
| EPI_ISL_1388583 |
| EPI_ISL_1389101 |
| EPI_ISL_1388530 |
| EPI_ISL_1389103 |
| EPI_ISL_1388408 |

|                 |
|-----------------|
| EPI_ISL_1388410 |
| EPI_ISL_1388412 |
| EPI_ISL_1389105 |
| EPI_ISL_1389107 |
| EPI_ISL_1389111 |
| EPI_ISL_1389113 |
| EPI_ISL_1389093 |
| EPI_ISL_1747768 |
| EPI_ISL_1748314 |
| EPI_ISL_1748067 |
| EPI_ISL_1748321 |
| EPI_ISL_1748355 |
| EPI_ISL_1748434 |
| EPI_ISL_1748653 |
| EPI_ISL_1748263 |
| EPI_ISL_1747864 |
| EPI_ISL_2270110 |
| EPI_ISL_2652251 |
| EPI_ISL_2610991 |

|                 |
|-----------------|
| EPI_ISL_2610970 |
| EPI_ISL_2610992 |
| EPI_ISL_2610993 |
| EPI_ISL_2610977 |
| EPI_ISL_2610995 |
| EPI_ISL_2610996 |
| EPI_ISL_2610997 |
| EPI_ISL_2652252 |
| EPI_ISL_2610998 |
| EPI_ISL_2610999 |
| EPI_ISL_2622137 |
| EPI_ISL_2611001 |
| EPI_ISL_2622139 |
| EPI_ISL_2622140 |
| EPI_ISL_2652253 |
| EPI_ISL_2652254 |
| EPI_ISL_2622141 |
| EPI_ISL_2652255 |
| EPI_ISL_2622143 |

|                 |
|-----------------|
| EPI_ISL_2622144 |
| EPI_ISL_2622145 |
| EPI_ISL_2622147 |
| EPI_ISL_2622148 |
| EPI_ISL_2622149 |
| EPI_ISL_2622150 |
| EPI_ISL_2652256 |
| EPI_ISL_2652257 |
| EPI_ISL_2652258 |
| EPI_ISL_2652262 |
| EPI_ISL_2652263 |
| EPI_ISL_2652264 |
| EPI_ISL_2768037 |
| EPI_ISL_2768038 |
| EPI_ISL_2768039 |
| EPI_ISL_2768040 |
| EPI_ISL_2768041 |
| EPI_ISL_2768082 |
| EPI_ISL_2768083 |

|                 |
|-----------------|
| EPI_ISL_2768084 |
| EPI_ISL_2768085 |
| EPI_ISL_2768086 |
| EPI_ISL_2768093 |
| EPI_ISL_2768094 |
| EPI_ISL_2833668 |
| EPI_ISL_2858589 |
| EPI_ISL_2858590 |
| EPI_ISL_3086263 |
| EPI_ISL_3086265 |
| EPI_ISL_3086267 |
| EPI_ISL_3086268 |
| EPI_ISL_3086269 |
| EPI_ISL_3086273 |
| EPI_ISL_3086274 |
| EPI_ISL_3086277 |
| EPI_ISL_3030102 |
| EPI_ISL_3030104 |
| EPI_ISL_3030106 |

|                 |
|-----------------|
| EPI_ISL_3030109 |
| EPI_ISL_3030111 |
| EPI_ISL_3030113 |
| EPI_ISL_3030117 |
| EPI_ISL_3030119 |
| EPI_ISL_3030123 |
| EPI_ISL_3030127 |
| EPI_ISL_3030129 |
| EPI_ISL_3030131 |
| EPI_ISL_3030133 |
| EPI_ISL_3030135 |
| EPI_ISL_3086280 |
| EPI_ISL_3086282 |
| EPI_ISL_3086284 |
| EPI_ISL_3086285 |
| EPI_ISL_3086287 |
| EPI_ISL_3086289 |
| EPI_ISL_3086290 |
| EPI_ISL_3184341 |

|                 |
|-----------------|
| EPI_ISL_3184342 |
| EPI_ISL_3184343 |
| EPI_ISL_3184344 |
| EPI_ISL_3184345 |
| EPI_ISL_3184346 |
| EPI_ISL_3184347 |
| EPI_ISL_3086294 |
| EPI_ISL_3086295 |
| EPI_ISL_3086297 |
| EPI_ISL_3086302 |
| EPI_ISL_3086303 |
| EPI_ISL_3086305 |
| EPI_ISL_3086306 |
| EPI_ISL_3086307 |
| EPI_ISL_3247285 |
| EPI_ISL_3247286 |
| EPI_ISL_3247287 |
| EPI_ISL_3247288 |
| EPI_ISL_3247289 |

|                 |
|-----------------|
| EPI_ISL_3247290 |
| EPI_ISL_3247291 |
| EPI_ISL_3247292 |
| EPI_ISL_3247293 |
| EPI_ISL_3247294 |
| EPI_ISL_3247295 |
| EPI_ISL_3247296 |
| EPI_ISL_3247297 |
| EPI_ISL_3247298 |
| EPI_ISL_3247299 |
| EPI_ISL_3247300 |
| EPI_ISL_3247301 |
| EPI_ISL_3086314 |
| EPI_ISL_3247302 |
| EPI_ISL_3247303 |
| EPI_ISL_3247304 |
| EPI_ISL_3247305 |
| EPI_ISL_3247306 |
| EPI_ISL_3247307 |

|                 |
|-----------------|
| EPI_ISL_3247308 |
| EPI_ISL_3247309 |
| EPI_ISL_3247310 |
| EPI_ISL_3247313 |
| EPI_ISL_3247314 |
| EPI_ISL_3184348 |
| EPI_ISL_3247315 |
| EPI_ISL_3184349 |
| EPI_ISL_3229188 |
| EPI_ISL_3229189 |
| EPI_ISL_3229190 |
| EPI_ISL_3229191 |
| EPI_ISL_3229192 |
| EPI_ISL_3229193 |
| EPI_ISL_3229194 |
| EPI_ISL_3184351 |
| EPI_ISL_3086316 |
| EPI_ISL_3086317 |
| EPI_ISL_3184352 |

|                 |
|-----------------|
| EPI_ISL_3184353 |
| EPI_ISL_3229195 |
| EPI_ISL_3184355 |
| EPI_ISL_3184356 |
| EPI_ISL_3184367 |
| EPI_ISL_3184357 |
| EPI_ISL_3184363 |
| EPI_ISL_3229196 |
| EPI_ISL_3184366 |
| EPI_ISL_3229198 |
| EPI_ISL_3229199 |
| EPI_ISL_3229200 |
| EPI_ISL_3229201 |
| EPI_ISL_3229202 |
| EPI_ISL_3184368 |
| EPI_ISL_3184369 |
| EPI_ISL_3229204 |
| EPI_ISL_3229205 |
| EPI_ISL_3229206 |

|                 |
|-----------------|
| EPI_ISL_3229207 |
| EPI_ISL_3229208 |
| EPI_ISL_3229209 |
| EPI_ISL_3229210 |
| EPI_ISL_3229211 |
| EPI_ISL_3229213 |
| EPI_ISL_3229214 |
| EPI_ISL_3229215 |
| EPI_ISL_3229217 |
| EPI_ISL_3229218 |
| EPI_ISL_3229219 |
| EPI_ISL_3229220 |
| EPI_ISL_3229221 |
| EPI_ISL_3229222 |
| EPI_ISL_3229223 |
| EPI_ISL_3229224 |
| EPI_ISL_3229225 |
| EPI_ISL_3229227 |
| EPI_ISL_3229230 |

|                 |
|-----------------|
| EPI_ISL_3229231 |
| EPI_ISL_3229241 |
| EPI_ISL_3229245 |
| EPI_ISL_3229246 |
| EPI_ISL_3229247 |
| EPI_ISL_3229248 |
| EPI_ISL_3229249 |
| EPI_ISL_3229250 |
| EPI_ISL_3229253 |
| EPI_ISL_3229254 |
| EPI_ISL_3229255 |
| EPI_ISL_3303731 |
| EPI_ISL_3303732 |
| EPI_ISL_3303737 |
| EPI_ISL_3303740 |
| EPI_ISL_3303743 |
| EPI_ISL_3303744 |
| EPI_ISL_3303745 |
| EPI_ISL_3303746 |

|                 |
|-----------------|
| EPI_ISL_3303747 |
| EPI_ISL_3303749 |
| EPI_ISL_3303750 |
| EPI_ISL_3303751 |
| EPI_ISL_3344074 |
| EPI_ISL_3344075 |
| EPI_ISL_3247324 |
| EPI_ISL_3247325 |
| EPI_ISL_3247326 |
| EPI_ISL_3247327 |
| EPI_ISL_3247328 |
| EPI_ISL_3247329 |
| EPI_ISL_3247331 |
| EPI_ISL_3303754 |
| EPI_ISL_3303755 |
| EPI_ISL_3303756 |
| EPI_ISL_3303757 |
| EPI_ISL_3247336 |
| EPI_ISL_3247349 |

|                 |
|-----------------|
| EPI_ISL_3303758 |
| EPI_ISL_3303760 |
| EPI_ISL_3303762 |
| EPI_ISL_3303763 |
| EPI_ISL_3303764 |
| EPI_ISL_3344076 |
| EPI_ISL_3344077 |
| EPI_ISL_3344079 |
| EPI_ISL_3344083 |
| EPI_ISL_3344084 |
| EPI_ISL_3344086 |
| EPI_ISL_3344087 |
| EPI_ISL_3451670 |
| EPI_ISL_3451671 |
| EPI_ISL_3451673 |
| EPI_ISL_3451674 |
| EPI_ISL_3451676 |
| EPI_ISL_3344088 |
| EPI_ISL_3451677 |

|                 |
|-----------------|
| EPI_ISL_3451678 |
| EPI_ISL_3451679 |
| EPI_ISL_3451680 |
| EPI_ISL_3344091 |
| EPI_ISL_3344092 |
| EPI_ISL_3344093 |
| EPI_ISL_3344094 |
| EPI_ISL_3344095 |
| EPI_ISL_3344096 |
| EPI_ISL_3344097 |
| EPI_ISL_3451681 |
| EPI_ISL_3344098 |
| EPI_ISL_3451682 |
| EPI_ISL_3451683 |
| EPI_ISL_3344100 |
| EPI_ISL_3451684 |
| EPI_ISL_3344101 |
| EPI_ISL_3451685 |
| EPI_ISL_3344102 |

|                 |
|-----------------|
| EPI_ISL_3344103 |
| EPI_ISL_3344104 |
| EPI_ISL_3344106 |
| EPI_ISL_3344107 |
| EPI_ISL_3344109 |
| EPI_ISL_3344110 |
| EPI_ISL_3344111 |
| EPI_ISL_3344112 |
| EPI_ISL_3344113 |
| EPI_ISL_3344115 |
| EPI_ISL_3344116 |
| EPI_ISL_3344117 |
| EPI_ISL_3344118 |
| EPI_ISL_3530118 |
| EPI_ISL_3530120 |
| EPI_ISL_3530122 |
| EPI_ISL_3530124 |
| EPI_ISL_3530125 |
| EPI_ISL_3530127 |

|                 |
|-----------------|
| EPI_ISL_3530129 |
| EPI_ISL_3530131 |
| EPI_ISL_3530133 |
| EPI_ISL_3530135 |
| EPI_ISL_3530137 |
| EPI_ISL_3344122 |
| EPI_ISL_3530141 |
| EPI_ISL_3530143 |
| EPI_ISL_3530144 |
| EPI_ISL_3530146 |
| EPI_ISL_3530148 |
| EPI_ISL_3530150 |
| EPI_ISL_3530152 |
| EPI_ISL_3530159 |
| EPI_ISL_3530161 |
| EPI_ISL_3530163 |
| EPI_ISL_3530165 |
| EPI_ISL_3530167 |
| EPI_ISL_3530169 |

|                 |
|-----------------|
| EPI_ISL_3530171 |
| EPI_ISL_3530173 |
| EPI_ISL_3530179 |
| EPI_ISL_3530181 |
| EPI_ISL_4485752 |
| EPI_ISL_4251188 |
| EPI_ISL_4251189 |
| EPI_ISL_4485754 |
| EPI_ISL_4251190 |
| EPI_ISL_4485755 |
| EPI_ISL_4251192 |
| EPI_ISL_3451688 |
| EPI_ISL_3425797 |
| EPI_ISL_3425800 |
| EPI_ISL_4485757 |
| EPI_ISL_4485759 |
| EPI_ISL_4485760 |
| EPI_ISL_3710246 |
| EPI_ISL_3710247 |



|                 |
|-----------------|
| EPI_ISL_3710248 |
| EPI_ISL_3710249 |
| EPI_ISL_3710250 |
| EPI_ISL_3425805 |
| EPI_ISL_3710251 |
| EPI_ISL_3710252 |
| EPI_ISL_3425806 |
| EPI_ISL_3710253 |
| EPI_ISL_3530754 |
| EPI_ISL_3530756 |
| EPI_ISL_3530758 |
| EPI_ISL_3451695 |
| EPI_ISL_3451698 |
| EPI_ISL_3530760 |
| EPI_ISL_3530762 |
| EPI_ISL_3530764 |
| EPI_ISL_3530766 |
| EPI_ISL_3530768 |
| EPI_ISL_3303767 |

|                 |
|-----------------|
| EPI_ISL_3303768 |
| EPI_ISL_3303769 |
| EPI_ISL_3303770 |
| EPI_ISL_3303771 |
| EPI_ISL_3303794 |
| EPI_ISL_3303772 |
| EPI_ISL_3303773 |
| EPI_ISL_3303774 |
| EPI_ISL_3303775 |
| EPI_ISL_3303776 |
| EPI_ISL_3303777 |
| EPI_ISL_3303778 |
| EPI_ISL_3303779 |
| EPI_ISL_3303780 |
| EPI_ISL_3303781 |
| EPI_ISL_3303782 |
| EPI_ISL_3303783 |
| EPI_ISL_3303784 |
| EPI_ISL_3303785 |

|                 |
|-----------------|
| EPI_ISL_3303786 |
| EPI_ISL_3303787 |
| EPI_ISL_3303788 |
| EPI_ISL_3303789 |
| EPI_ISL_3303790 |
| EPI_ISL_3303791 |
| EPI_ISL_3303792 |
| EPI_ISL_3303793 |
| EPI_ISL_3530770 |
| EPI_ISL_3530772 |
| EPI_ISL_3530774 |
| EPI_ISL_3530776 |
| EPI_ISL_4251194 |
| EPI_ISL_3451719 |
| EPI_ISL_3451723 |
| EPI_ISL_3451732 |
| EPI_ISL_3451733 |
| EPI_ISL_4251197 |
| EPI_ISL_3824224 |

|                 |
|-----------------|
| EPI_ISL_3530779 |
| EPI_ISL_3530783 |
| EPI_ISL_3530785 |
| EPI_ISL_3530791 |
| EPI_ISL_3530792 |
| EPI_ISL_3530796 |
| EPI_ISL_3530798 |
| EPI_ISL_3530800 |
| EPI_ISL_3530802 |
| EPI_ISL_3530804 |
| EPI_ISL_3530806 |
| EPI_ISL_3530808 |
| EPI_ISL_3570084 |
| EPI_ISL_3570085 |
| EPI_ISL_3570086 |
| EPI_ISL_3570087 |
| EPI_ISL_3570088 |
| EPI_ISL_3570090 |
| EPI_ISL_3570091 |

|                 |
|-----------------|
| EPI_ISL_3570092 |
| EPI_ISL_3570093 |
| EPI_ISL_3570094 |
| EPI_ISL_3570095 |
| EPI_ISL_4392856 |
| EPI_ISL_3570098 |
| EPI_ISL_3570099 |
| EPI_ISL_3710254 |
| EPI_ISL_3570100 |
| EPI_ISL_3570101 |
| EPI_ISL_3570102 |
| EPI_ISL_3570103 |
| EPI_ISL_3570104 |
| EPI_ISL_3570105 |
| EPI_ISL_3570106 |
| EPI_ISL_3570107 |
| EPI_ISL_3570108 |
| EPI_ISL_3570109 |
| EPI_ISL_3710255 |

|                 |
|-----------------|
| EPI_ISL_3570110 |
| EPI_ISL_3570113 |
| EPI_ISL_3570114 |
| EPI_ISL_3570115 |
| EPI_ISL_3570116 |
| EPI_ISL_3570117 |
| EPI_ISL_3570118 |
| EPI_ISL_3570119 |
| EPI_ISL_3570120 |
| EPI_ISL_3570121 |
| EPI_ISL_3570122 |
| EPI_ISL_3570124 |
| EPI_ISL_3570125 |
| EPI_ISL_3570126 |
| EPI_ISL_3570127 |
| EPI_ISL_3530829 |
| EPI_ISL_3530831 |
| EPI_ISL_3570128 |
| EPI_ISL_3570129 |

|                 |
|-----------------|
| EPI_ISL_3570130 |
| EPI_ISL_3570131 |
| EPI_ISL_3570132 |
| EPI_ISL_3570133 |
| EPI_ISL_3570134 |
| EPI_ISL_3570135 |
| EPI_ISL_3570136 |
| EPI_ISL_3570137 |
| EPI_ISL_3570138 |
| EPI_ISL_3570139 |
| EPI_ISL_3570140 |
| EPI_ISL_3570141 |
| EPI_ISL_3570142 |
| EPI_ISL_4392857 |
| EPI_ISL_4392858 |
| EPI_ISL_4392859 |
| EPI_ISL_4392860 |
| EPI_ISL_4392862 |
| EPI_ISL_4392863 |

|                 |
|-----------------|
| EPI_ISL_4395035 |
| EPI_ISL_3824226 |
| EPI_ISL_4392865 |
| EPI_ISL_3824227 |
| EPI_ISL_4392866 |
| EPI_ISL_4392867 |
| EPI_ISL_4392868 |
| EPI_ISL_4392869 |
| EPI_ISL_4392870 |
| EPI_ISL_4392871 |
| EPI_ISL_3824228 |
| EPI_ISL_3824229 |
| EPI_ISL_4392872 |
| EPI_ISL_4392873 |
| EPI_ISL_4392874 |
| EPI_ISL_4392875 |
| EPI_ISL_4485762 |
| EPI_ISL_4392877 |
| EPI_ISL_3824230 |

|                 |
|-----------------|
| EPI_ISL_4392878 |
| EPI_ISL_4392879 |
| EPI_ISL_4485763 |
| EPI_ISL_4485765 |
| EPI_ISL_3710264 |
| EPI_ISL_4392880 |
| EPI_ISL_4485766 |
| EPI_ISL_4485768 |
| EPI_ISL_4485770 |
| EPI_ISL_4485771 |
| EPI_ISL_4485773 |
| EPI_ISL_4485776 |
| EPI_ISL_4485778 |
| EPI_ISL_4485781 |
| EPI_ISL_4485783 |
| EPI_ISL_4485784 |
| EPI_ISL_4485786 |
| EPI_ISL_4485788 |
| EPI_ISL_4485789 |

|                 |
|-----------------|
| EPI_ISL_4485791 |
| EPI_ISL_4485793 |
| EPI_ISL_4485794 |
| EPI_ISL_4485796 |
| EPI_ISL_4251198 |
| EPI_ISL_4251199 |
| EPI_ISL_4251200 |
| EPI_ISL_4251203 |
| EPI_ISL_4485798 |
| EPI_ISL_4251204 |
| EPI_ISL_4251206 |
| EPI_ISL_4485799 |
| EPI_ISL_4485801 |
| EPI_ISL_4485803 |
| EPI_ISL_4485804 |
| EPI_ISL_4485806 |
| EPI_ISL_4485807 |
| EPI_ISL_4485809 |
| EPI_ISL_4485811 |

|                 |
|-----------------|
| EPI_ISL_4485812 |
| EPI_ISL_4485814 |
| EPI_ISL_4485815 |
| EPI_ISL_4485817 |
| EPI_ISL_4485819 |
| EPI_ISL_4485820 |
| EPI_ISL_4485822 |
| EPI_ISL_4485825 |
| EPI_ISL_4450796 |
| EPI_ISL_3730669 |
| EPI_ISL_3730670 |
| EPI_ISL_3730690 |
| EPI_ISL_3730693 |
| EPI_ISL_3824245 |
| EPI_ISL_3824257 |
| EPI_ISL_3824261 |
| EPI_ISL_3824269 |
| EPI_ISL_4395150 |
| EPI_ISL_3824270 |

|                 |
|-----------------|
| EPI_ISL_4395085 |
| EPI_ISL_4395151 |
| EPI_ISL_4410796 |
| EPI_ISL_4395152 |
| EPI_ISL_4251219 |
| EPI_ISL_4251221 |
| EPI_ISL_4251223 |
| EPI_ISL_4251231 |
| EPI_ISL_4251235 |
| EPI_ISL_4251236 |
| EPI_ISL_4251237 |
| EPI_ISL_4251238 |
| EPI_ISL_4395153 |
| EPI_ISL_4395154 |
| EPI_ISL_4395155 |
| EPI_ISL_4251248 |
| EPI_ISL_4251249 |
| EPI_ISL_4485827 |
| EPI_ISL_4395156 |

|                 |
|-----------------|
| EPI_ISL_4395157 |
| EPI_ISL_4395087 |
| EPI_ISL_4395158 |
| EPI_ISL_4395159 |
| EPI_ISL_4395160 |
| EPI_ISL_4395042 |
| EPI_ISL_4395043 |
| EPI_ISL_4395044 |
| EPI_ISL_4395045 |
| EPI_ISL_4395046 |
| EPI_ISL_4395059 |
| EPI_ISL_4395061 |
| EPI_ISL_4395062 |
| EPI_ISL_4395063 |
| EPI_ISL_4395064 |
| EPI_ISL_4395088 |
| EPI_ISL_4395089 |
| EPI_ISL_4395065 |
| EPI_ISL_4395066 |

|                 |
|-----------------|
| EPI_ISL_4395067 |
| EPI_ISL_4395068 |
| EPI_ISL_4395161 |
| EPI_ISL_4395069 |
| EPI_ISL_4395070 |
| EPI_ISL_4395072 |
| EPI_ISL_4395162 |
| EPI_ISL_4395091 |
| EPI_ISL_4450797 |
| EPI_ISL_4450798 |
| EPI_ISL_4450799 |
| EPI_ISL_4450800 |
| EPI_ISL_4450802 |
| EPI_ISL_4450803 |
| EPI_ISL_4450804 |
| EPI_ISL_4450805 |
| EPI_ISL_4450806 |
| EPI_ISL_4450807 |
| EPI_ISL_4450808 |

|                 |
|-----------------|
| EPI_ISL_4450809 |
| EPI_ISL_4395102 |
| EPI_ISL_4450810 |
| EPI_ISL_4395103 |
| EPI_ISL_4395104 |
| EPI_ISL_4395105 |
| EPI_ISL_4395107 |
| EPI_ISL_4395109 |
| EPI_ISL_4395110 |
| EPI_ISL_4395113 |
| EPI_ISL_4395114 |
| EPI_ISL_4395138 |
| EPI_ISL_4395163 |
| EPI_ISL_4395164 |
| EPI_ISL_4395165 |
| EPI_ISL_4410804 |
| EPI_ISL_4395166 |
| EPI_ISL_4410806 |
| EPI_ISL_4450855 |

|                 |
|-----------------|
| EPI_ISL_4395167 |
| EPI_ISL_4450859 |
| EPI_ISL_4450860 |
| EPI_ISL_4450861 |
| EPI_ISL_4450862 |
| EPI_ISL_4450863 |
| EPI_ISL_4395168 |
| EPI_ISL_4395169 |
| EPI_ISL_4395170 |
| EPI_ISL_4395171 |
| EPI_ISL_4450867 |
| EPI_ISL_4450868 |
| EPI_ISL_4450869 |
| EPI_ISL_4395172 |
| EPI_ISL_4395173 |
| EPI_ISL_4395174 |
| EPI_ISL_4450870 |
| EPI_ISL_4395175 |
| EPI_ISL_4450871 |

|                 |
|-----------------|
| EPI_ISL_4395176 |
| EPI_ISL_4395177 |
| EPI_ISL_4450873 |
| EPI_ISL_4450874 |
| EPI_ISL_4450875 |
| EPI_ISL_4450876 |
| EPI_ISL_4450877 |
| EPI_ISL_4450879 |
| EPI_ISL_4450880 |
| EPI_ISL_4450881 |
| EPI_ISL_4450882 |
| EPI_ISL_4450883 |
| EPI_ISL_4450884 |
| EPI_ISL_4450885 |
| EPI_ISL_4450887 |
| EPI_ISL_4450888 |
| EPI_ISL_4450828 |
| EPI_ISL_4450889 |
| EPI_ISL_4450890 |

|                 |
|-----------------|
| EPI_ISL_4450891 |
| EPI_ISL_4450892 |
| EPI_ISL_4450893 |
| EPI_ISL_4450894 |
| EPI_ISL_4450896 |
| EPI_ISL_4450897 |
| EPI_ISL_4450829 |
| EPI_ISL_4450830 |
| EPI_ISL_4450831 |
| EPI_ISL_4450832 |
| EPI_ISL_4450833 |
| EPI_ISL_4450898 |
| EPI_ISL_4450834 |
| EPI_ISL_4450835 |
| EPI_ISL_4450836 |
| EPI_ISL_4450900 |
| EPI_ISL_4450901 |
| EPI_ISL_4450902 |
| EPI_ISL_4450903 |

|                 |
|-----------------|
| EPI_ISL_4450837 |
| EPI_ISL_4450838 |
| EPI_ISL_4450839 |
| EPI_ISL_4450840 |
| EPI_ISL_4450841 |
| EPI_ISL_4450904 |
| EPI_ISL_4450905 |
| EPI_ISL_4395229 |
| EPI_ISL_4395267 |
| EPI_ISL_4395269 |
| EPI_ISL_4410809 |
| EPI_ISL_4395271 |
| EPI_ISL_4395273 |
| EPI_ISL_4395275 |
| EPI_ISL_4395277 |
| EPI_ISL_4395279 |
| EPI_ISL_4395281 |
| EPI_ISL_4395284 |
| EPI_ISL_4395286 |

|                 |
|-----------------|
| EPI_ISL_4395288 |
| EPI_ISL_4395290 |
| EPI_ISL_4395292 |
| EPI_ISL_4395293 |
| EPI_ISL_4395295 |
| EPI_ISL_4395297 |
| EPI_ISL_4395299 |
| EPI_ISL_4395301 |
| EPI_ISL_4395303 |
| EPI_ISL_4395304 |
| EPI_ISL_4395306 |
| EPI_ISL_4395308 |
| EPI_ISL_4395310 |
| EPI_ISL_4395313 |
| EPI_ISL_4395315 |
| EPI_ISL_4410811 |
| EPI_ISL_4410815 |
| EPI_ISL_4410816 |
| EPI_ISL_4410827 |

|                 |
|-----------------|
| EPI_ISL_4410833 |
| EPI_ISL_4410835 |
| EPI_ISL_4410837 |
| EPI_ISL_4410838 |
| EPI_ISL_4410840 |
| EPI_ISL_4410844 |
| EPI_ISL_4410845 |
| EPI_ISL_4410862 |
| EPI_ISL_4410864 |
| EPI_ISL_4410866 |
| EPI_ISL_4410867 |
| EPI_ISL_4410869 |
| EPI_ISL_4410871 |
| EPI_ISL_4410884 |
| EPI_ISL_4410886 |
| EPI_ISL_4410888 |
| EPI_ISL_4410890 |
| EPI_ISL_4542095 |
| EPI_ISL_4542097 |

|                 |
|-----------------|
| EPI_ISL_4542099 |
| EPI_ISL_4542102 |
| EPI_ISL_4542104 |
| EPI_ISL_4542107 |
| EPI_ISL_4542110 |
| EPI_ISL_4542112 |
| EPI_ISL_4542114 |
| EPI_ISL_4571399 |
| EPI_ISL_4542117 |
| EPI_ISL_4542122 |
| EPI_ISL_4542155 |
| EPI_ISL_4542175 |
| EPI_ISL_4542177 |
| EPI_ISL_4542180 |
| EPI_ISL_4542185 |
| EPI_ISL_4542188 |
| EPI_ISL_4542190 |
| EPI_ISL_4542194 |
| EPI_ISL_4542197 |

|                 |
|-----------------|
| EPI_ISL_4542200 |
| EPI_ISL_4542202 |
| EPI_ISL_4542205 |
| EPI_ISL_4542208 |
| EPI_ISL_4542209 |
| EPI_ISL_4542212 |
| EPI_ISL_4571407 |
| EPI_ISL_4571409 |
| EPI_ISL_4571410 |
| EPI_ISL_4571411 |
| EPI_ISL_4571412 |
| EPI_ISL_4571420 |
| EPI_ISL_4571422 |
| EPI_ISL_4571423 |
| EPI_ISL_4571424 |
| EPI_ISL_4571425 |
| EPI_ISL_4571427 |
| EPI_ISL_4814041 |
| EPI_ISL_4814044 |

|                 |
|-----------------|
| EPI_ISL_4814050 |
| EPI_ISL_4814051 |
| EPI_ISL_4814067 |
| EPI_ISL_4814069 |
| EPI_ISL_4814087 |
| EPI_ISL_4814088 |
| EPI_ISL_4814097 |
| EPI_ISL_4814115 |
| EPI_ISL_4814116 |
| EPI_ISL_4814121 |
| EPI_ISL_4814122 |
| EPI_ISL_4814133 |
| EPI_ISL_528375  |
| EPI_ISL_528376  |
| EPI_ISL_528377  |
| EPI_ISL_528378  |
| EPI_ISL_528381  |
| EPI_ISL_581959  |
| EPI_ISL_581960  |



|                 |
|-----------------|
| EPI_ISL_581890  |
| EPI_ISL_581903  |
| EPI_ISL_581904  |
| EPI_ISL_581906  |
| EPI_ISL_581961  |
| EPI_ISL_581963  |
| EPI_ISL_582000  |
| EPI_ISL_582001  |
| EPI_ISL_582002  |
| EPI_ISL_1389057 |
| EPI_ISL_1388983 |
| EPI_ISL_1388971 |
| EPI_ISL_1388218 |
| EPI_ISL_1389010 |
| EPI_ISL_1388279 |
| EPI_ISL_1388681 |
| EPI_ISL_1388840 |
| EPI_ISL_1388987 |
| EPI_ISL_1388727 |

|                 |
|-----------------|
| EPI_ISL_1388447 |
| EPI_ISL_1388162 |
| EPI_ISL_1388444 |
| EPI_ISL_1388362 |
| EPI_ISL_1388462 |
| EPI_ISL_1388152 |
| EPI_ISL_1388534 |
| EPI_ISL_1388134 |
| EPI_ISL_1388191 |
| EPI_ISL_1388130 |
| EPI_ISL_1388478 |
| EPI_ISL_1388570 |
| EPI_ISL_1388482 |
| EPI_ISL_1388480 |
| EPI_ISL_1388497 |
| EPI_ISL_1388648 |
| EPI_ISL_1388572 |
| EPI_ISL_1388269 |
| EPI_ISL_1388486 |

|                 |
|-----------------|
| EPI_ISL_1388669 |
| EPI_ISL_1388484 |
| EPI_ISL_1388265 |
| EPI_ISL_1388404 |
| EPI_ISL_1388516 |
| EPI_ISL_1389095 |
| EPI_ISL_2611004 |
| EPI_ISL_2611005 |
| EPI_ISL_2653075 |
| EPI_ISL_3030142 |
| EPI_ISL_3247356 |
| EPI_ISL_3229259 |
| EPI_ISL_3303795 |
| EPI_ISL_3451737 |
| EPI_ISL_3344125 |
| EPI_ISL_3530197 |
| EPI_ISL_3710273 |
| EPI_ISL_3530840 |
| EPI_ISL_3570143 |

|                 |
|-----------------|
| EPI_ISL_3570144 |
| EPI_ISL_3570148 |
| EPI_ISL_4297849 |
| EPI_ISL_4297850 |
| EPI_ISL_4395084 |
| EPI_ISL_4450850 |
| EPI_ISL_4450851 |
| EPI_ISL_4450852 |
| EPI_ISL_4450916 |
| EPI_ISL_4450921 |
| EPI_ISL_4450922 |

|                 |
|-----------------|
| EPI_ISL_4450923 |
| EPI_ISL_4450924 |
| EPI_ISL_4395323 |
| EPI_ISL_4395324 |
| EPI_ISL_4410895 |
| EPI_ISL_4410897 |
| EPI_ISL_4542235 |
| EPI_ISL_4542237 |
| EPI_ISL_4814134 |
| EPI_ISL_4814145 |
| EPI_ISL_1388964 |

|                 |
|-----------------|
| EPI_ISL_1389017 |
| EPI_ISL_1388334 |
| EPI_ISL_2611006 |
| EPI_ISL_2833669 |
| EPI_ISL_2833670 |
| EPI_ISL_3530842 |
| EPI_ISL_4450926 |
| EPI_ISL_1388817 |
| EPI_ISL_1388289 |
| EPI_ISL_1388308 |

**Table S3.** Odds ratios in defined educational institutions (daycare [0-3 yo], kindergarten [4-5 yo], elementary school [6-11 yo], secondary school level I [12-15 yo], secondary school level II [16-19 yo]) compared to adults (>19 yo) for prevalent lineages from 01.10.2020 to 31.05.2021. Significant results to the level of 0.05 and confidence intervals (CI) not crossing 1 in boldface.

| comparison                              | OR           | 2.5% CI      | 97.5% CI      | p             |
|-----------------------------------------|--------------|--------------|---------------|---------------|
| B.1.1.39_Daycare_vs_adults              | 0.000        | NA           | 2.00E+13      | 0.9858        |
| B.1.1.39_Kindergarten_vs_adults         | 0.000        | NA           | 2.40E+24      | 0.9889        |
| B.1.1.39_Elementary_vs_adults           | 1.002        | 0.299        | 2.500         | 0.9977        |
| B.1.1.39_secondary_I_vs_adults          | 0.946        | 0.283        | 2.356         | 0.9159        |
| B.1.1.39_secondary_II_vs_adults         | 1.268        | 0.520        | 2.643         | 0.5615        |
| <b>B.1.1.7_Daycare_vs_adults</b>        | <b>4.327</b> | <b>1.834</b> | <b>11.322</b> | <b>0.0013</b> |
| <b>B.1.1.7_Kindergarten_vs_adults</b>   | <b>3.407</b> | <b>1.171</b> | <b>11.142</b> | <b>0.0287</b> |
| <b>B.1.1.7_Elementary_vs_adults</b>     | <b>2.975</b> | <b>1.840</b> | <b>4.887</b>  | <b>0.0000</b> |
| <b>B.1.1.7_secondary_I_vs_adults</b>    | <b>1.995</b> | <b>1.255</b> | <b>3.179</b>  | <b>0.0035</b> |
| <b>B.1.1.7_secondary_II_vs_adults</b>   | <b>1.521</b> | <b>1.008</b> | <b>2.283</b>  | <b>0.0436</b> |
| B.1.1.70_Daycare_vs_adults              | 0.000        | NA           | 6.81E+25      | 0.9914        |
| B.1.1.70_Kindergarten_vs_adults         | 3.528        | 0.191        | 18.607        | 0.2316        |
| B.1.1.70_Elementary_vs_adults           | 0.000        | 0.000        | 1.40E+10      | 0.9847        |
| B.1.1.70_secondary_I_vs_adults          | 1.885        | 0.445        | 5.451         | 0.3045        |
| B.1.1.70_secondary_II_vs_adults         | 0.459        | 0.026        | 2.174         | 0.4456        |
| B.1.160_Daycare_vs_adults               | 0.271        | 0.015        | 1.300         | 0.2028        |
| B.1.160_Kindergarten_vs_adults          | 0.000        | NA           | 2.22E+05      | 0.9717        |
| B.1.160_Elementary_vs_adults            | 0.542        | 0.208        | 1.168         | 0.1571        |
| B.1.160_secondary_I_vs_adults           | 0.511        | 0.196        | 1.099         | 0.1201        |
| B.1.160_secondary_II_vs_adults          | 0.881        | 0.462        | 1.551         | 0.6782        |
| B.1.177_Daycare_vs_adults               | 0.513        | 0.082        | 1.766         | 0.3700        |
| B.1.177_Kindergarten_vs_adults          | 0.000        | NA           | 2.01E+05      | 0.9715        |
| B.1.177_Elementary_vs_adults            | 0.317        | 0.096        | 0.776         | 0.0271        |
| B.1.177_secondary_I_vs_adults           | 0.634        | 0.278        | 1.261         | 0.2319        |
| B.1.177_secondary_II_vs_adults          | 0.796        | 0.418        | 1.401         | 0.4570        |
| B.1.214.2_Daycare_vs_adults             | 4.687        | 0.728        | 17.070        | 0.0432        |
| <b>B.1.214.2_Kindergarten_vs_adults</b> | <b>8.202</b> | <b>1.240</b> | <b>31.963</b> | <b>0.0075</b> |
| B.1.214.2_Elementary_vs_adults          | 1.406        | 0.224        | 4.808         | 0.6460        |
| B.1.214.2_secondary_I_vs_adults         | 0.656        | 0.037        | 3.139         | 0.6807        |
| B.1.214.2_secondary_II_vs_adults        | 1.507        | 0.356        | 4.348         | 0.5061        |
| B.1.617.2_Daycare_vs_adults             | 0.000        | NA           | 1.84E+112     | 0.9967        |
| B.1.617.2_Kindergarten_vs_adults        | 0.000        | NA           | 6.22E+145     | 0.9974        |
| <b>B.1.617.2_Elementary_vs_adults</b>   | <b>6.749</b> | <b>1.473</b> | <b>23.202</b> | <b>0.0049</b> |
| B.1.617.2_secondary_I_vs_adults         | 2.070        | 0.112        | 11.225        | 0.4929        |

B.1.617.2\_secondary\_II\_vs\_adults 0.000 NA 1.12E+50 0.9930

**Table S4.** Odds ratios in defined educational institutions (daycare [0-3 yo], elementary school [6-11 yo], secondary school level I [12-15 yo], secondary school level II [16-19 yo]) compared to adults (>19 years old) for prevalent lineages from 01.10.2020 to 31.12.2020. No cases in the age group of kindergarten [4-5 yo]. Significant results to the level of 0.05 and confidence intervals (CI) not crossing 1 in boldface.

| comparison                       | OR           | 2.5% CI      | 97.5% CI      | p             |
|----------------------------------|--------------|--------------|---------------|---------------|
| B.1.1.39_Daycare_vs_adults       | 0.000        | NA           | 3.41E+23      | 0.9836        |
| B.1.1.39_Elementary_vs_adults    | 2.491        | 0.692        | 7.164         | 0.1160        |
| B.1.1.39_secondary_I_vs_adults   | 1.006        | 0.236        | 2.950         | 0.9924        |
| B.1.1.39_secondary_II_vs_adults  | 1.649        | 0.654        | 3.628         | 0.2454        |
| B.1.1.7_Daycare_vs_adults        | 0.000        | NA           | 1.29E+282     | 0.9984        |
| B.1.1.7_Elementary_vs_adults     | 8.059        | 0.409        | 53.675        | 0.0631        |
| B.1.1.7_secondary_I_vs_adults    | 0.000        | NA           | 6.88E+140     | 0.9962        |
| B.1.1.7_secondary_II_vs_adults   | 0.000        | NA           | 1.15E+113     | 0.9953        |
| B.1.160_Daycare_vs_adults        | 0.765        | 0.039        | 5.213         | 0.8110        |
| B.1.160_Elementary_vs_adults     | 1.176        | 0.373        | 3.169         | 0.7607        |
| B.1.160_secondary_I_vs_adults    | 0.637        | 0.212        | 1.567         | 0.3670        |
| B.1.160_secondary_II_vs_adults   | 1.020        | 0.483        | 2.001         | 0.9569        |
| B.1.177_Daycare_vs_adults        | 1.806        | 0.237        | 10.984        | 0.5189        |
| B.1.177_Elementary_vs_adults     | 0.339        | 0.053        | 1.205         | 0.1515        |
| B.1.177_secondary_I_vs_adults    | 1.032        | 0.423        | 2.285         | 0.9403        |
| B.1.177_secondary_II_vs_adults   | 0.903        | 0.428        | 1.770         | 0.7765        |
| <b>B.1.258_Daycare_vs_adults</b> | <b>9.121</b> | <b>1.180</b> | <b>56.333</b> | <b>0.0169</b> |
| B.1.258_Elementary_vs_adults     | 0.805        | 0.044        | 4.053         | 0.8346        |
| B.1.258_secondary_I_vs_adults    | 1.013        | 0.160        | 3.526         | 0.9858        |
| B.1.258_secondary_II_vs_adults   | 1.001        | 0.236        | 2.890         | 0.9987        |

**Table S5.** Odds ratios in defined educational institutions (daycare [0-3 yo], kindergarten [4-5 yo], elementary school [6-11 yo], secondary school level I [12-15 yo], secondary school level II [16-19 yo]) compared to adults (>19 years old) for prevalent lineages from 01.01.2021 to 29.02.2021. Significant results to the level of 0.05 and confidence intervals (CI) not crossing 1 in boldface.

| comparison                              | OR           | 2.5% CI      | 97.5% CI      | p             |
|-----------------------------------------|--------------|--------------|---------------|---------------|
| B.1.1.7_Daycare_vs_adults               | 1.24E+07     | 0.000        | NA            | 0.9800        |
| B.1.1.7_Kindergarten_vs_adults          | 1.076        | 0.050        | 11.393        | 0.9526        |
| <b>B.1.1.7_Elementary_vs_adults</b>     | <b>3.945</b> | <b>1.448</b> | <b>11.808</b> | <b>0.0090</b> |
| B.1.1.7_secondary_I_vs_adults           | 2.152        | 0.583        | 7.942         | 0.2362        |
| B.1.1.7_secondary_II_vs_adults          | 0.478        | 0.072        | 1.909         | 0.3525        |
| B.1.1.70_Daycare_vs_adults              | 0.000        | NA           | 2.4E+124      | 0.9957        |
| B.1.1.70_Kindergarten_vs_adults         | 7.281        | 0.328        | 80.061        | 0.1127        |
| B.1.1.70_Elementary_vs_adults           | 0.000        | NA           | 3.6E+36       | 0.9920        |
| B.1.1.70_secondary_I_vs_adults          | 0.000        | NA           | 5.2E+61       | 0.9939        |
| B.1.1.70_secondary_II_vs_adults         | 1.456        | 0.077        | 8.350         | 0.7279        |
| B.1.177_Daycare_vs_adults               | 0.000        | NA           | 8.1E+72       | 0.9929        |
| B.1.177_Kindergarten_vs_adults          | 0.000        | NA           | 3.4E+122      | 0.9945        |
| B.1.177_Elementary_vs_adults            | 0.843        | 0.129        | 3.169         | 0.8258        |
| B.1.177_secondary_I_vs_adults           | 0.000        | NA           | 9.4E+34       | 0.9900        |
| B.1.177_secondary_II_vs_adults          | 1.405        | 0.208        | 5.748         | 0.6719        |
| B.1.214.2_Daycare_vs_adults             | 0.000        | NA           | 1.3E+207      | 0.9974        |
| B.1.214.2_Kindergarten_vs_adults        | 20.250       | 0.873        | 242.850       | 0.0200        |
| B.1.214.2_Elementary_vs_adults          | 0.000        | NA           | 1.0E+89       | 0.9951        |
| B.1.214.2_secondary_I_vs_adults         | 0.000        | NA           | 1.4E+118      | 0.9963        |
| <b>B.1.214.2_secondary_II_vs_adults</b> | <b>9.000</b> | <b>1.208</b> | <b>46.005</b> | <b>0.0130</b> |

**Table S6.** Odds ratios in defined educational institutions (daycare [0-3 yo], kindergarten [4-5 yo], elementary school [6-11 yo], secondary school level I [12-15 yo], secondary school level II [16-19 yo]) compared to adults (>19 yo) for prevalent lineages from 01.03.2021 to 31.05.2021. Significant results to the level of 0.05 and confidence intervals (CI) not crossing 1 in boldface.

| comparison                       | OR    | 2.5% CI | 97.5% CI | p      |
|----------------------------------|-------|---------|----------|--------|
| B.1.1.7_Daycare_vs_adults        | 0.889 | 0.232   | 5.8313   | 0.8805 |
| B.1.1.7_Kindergarten_vs_adults   | 0.431 | 0.121   | 2.0066   | 0.2228 |
| B.1.1.7_Elementary_vs_adults     | 1.035 | 0.422   | 3.1113   | 0.9453 |
| B.1.1.7_secondary_I_vs_adults    | 1.833 | 0.635   | 7.7635   | 0.3262 |
| B.1.1.7_secondary_II_vs_adults   | 2.318 | 0.814   | 9.7540   | 0.1696 |
| B.1.214.2_Daycare_vs_adults      | 3.678 | 0.548   | 14.8086  | 0.1032 |
| B.1.214.2_Kindergarten_vs_adults | 2.023 | 0.108   | 11.2891  | 0.5108 |
| B.1.214.2_Elementary_vs_adults   | 1.156 | 0.181   | 4.1482   | 0.8487 |
| B.1.214.2_secondary_I_vs_adults  | 0.562 | 0.031   | 2.7992   | 0.5783 |
| B.1.214.2_secondary_II_vs_adults | 0.449 | 0.025   | 2.2201   | 0.4395 |
| B.1.617.2_Daycare_vs_adults      | 0.000 | NA      | 9.18E+87 | 0.9958 |
| B.1.617.2_Kindergarten_vs_adults | 0.000 | NA      | 1.65E+96 | 0.9962 |
| B.1.617.2_Elementary_vs_adults   | 4.490 | 0.963   | 15.8680  | 0.0295 |
| B.1.617.2_secondary_I_vs_adults  | 1.414 | 0.076   | 7.8355   | 0.7459 |
| B.1.617.2_secondary_II_vs_adults | 0.000 | NA      | 3.81E+43 | 0.9921 |

**Table S7.** Summary of SARS-CoV-2 lineages and cases per lineage detected in different educational institutions from 01.10.2020 to 31.05.2021.

| PANGO     | Daycare | Kindergarten | Elementary | secondary_I | secondary_II | adults | Total |
|-----------|---------|--------------|------------|-------------|--------------|--------|-------|
| B         |         |              |            |             |              | 1      | 1     |
| B.1       |         |              |            | 2           | 2            | 18     | 22    |
| B.1.1     |         |              |            | 1           |              | 11     | 12    |
| B.1.1.1   |         |              |            |             |              | 4      | 4     |
| B.1.1.117 |         |              |            |             |              | 1      | 1     |
| B.1.1.130 |         |              |            |             |              | 1      | 1     |
| B.1.1.135 |         |              |            |             |              | 1      | 1     |
| B.1.1.141 |         |              |            |             |              | 1      | 1     |
| B.1.1.144 |         |              |            |             |              | 1      | 1     |
| B.1.1.153 |         |              |            |             |              | 4      | 4     |
| B.1.1.170 |         |              |            |             | 1            |        | 1     |
| B.1.1.186 |         |              |            |             |              | 1      | 1     |
| B.1.1.189 |         |              | 2          |             | 1            | 6      | 9     |
| B.1.1.194 |         |              |            |             |              | 1      | 1     |
| B.1.1.220 |         |              |            |             |              | 1      | 1     |
| B.1.1.247 |         |              |            |             |              | 1      | 1     |
| B.1.1.250 |         |              |            |             |              | 2      | 2     |
| B.1.1.269 |         |              |            |             | 1            | 1      | 2     |
| B.1.1.277 |         |              |            |             |              | 2      | 2     |
| B.1.1.288 |         |              |            |             |              | 6      | 6     |
| B.1.1.29  |         |              | 1          |             |              | 9      | 10    |
| B.1.1.297 |         |              |            |             |              | 2      | 2     |
| B.1.1.318 |         |              |            |             | 1            |        | 1     |
| B.1.1.348 |         |              |            |             |              | 1      | 1     |
| B.1.1.37  |         |              |            |             |              | 2      | 2     |
| B.1.1.39  |         |              | 4          | 4           | 7            | 78     | 93    |
| B.1.1.445 |         |              |            |             |              | 1      | 1     |
| B.1.1.47  |         |              |            | 1           |              | 5      | 6     |
| B.1.1.519 |         |              |            |             |              | 2      | 2     |
| B.1.1.54  |         |              |            |             |              | 1      | 1     |
| B.1.1.7   | 16      | 9            | 44         | 39          | 45           | 486    | 639   |
| B.1.1.70  |         | 1            |            | 3           | 1            | 30     | 35    |
| B.1.1.84  |         |              |            |             |              | 2      | 2     |

|                   |   |   |   |   |    |     |     |
|-------------------|---|---|---|---|----|-----|-----|
| <b>B.1.1.99</b>   |   |   |   |   | 1  | 3   | 4   |
| <b>B.1.146</b>    |   |   |   |   |    | 1   | 1   |
| <b>B.1.160</b>    | 1 |   | 6 | 6 | 13 | 202 | 228 |
| <b>B.1.160.10</b> |   |   |   |   |    | 1   | 1   |
| <b>B.1.160.12</b> |   |   |   |   |    | 1   | 1   |
| <b>B.1.160.14</b> |   |   |   |   |    | 1   | 1   |
| <b>B.1.160.16</b> |   |   |   | 1 | 1  | 1   | 3   |
| <b>B.1.160.19</b> |   |   |   |   |    | 1   | 1   |
| <b>B.1.160.20</b> |   |   |   |   |    | 11  | 11  |
| <b>B.1.160.30</b> |   |   |   |   |    | 2   | 2   |
| <b>B.1.160.32</b> |   |   |   |   |    | 1   | 1   |
| <b>B.1.177</b>    | 2 |   | 4 | 8 | 13 | 220 | 247 |
| <b>B.1.177.23</b> |   |   |   | 1 | 1  | 11  | 13  |
| <b>B.1.177.43</b> |   |   |   |   |    | 2   | 2   |
| <b>B.1.177.44</b> |   |   |   |   |    | 2   | 2   |
| <b>B.1.177.86</b> |   |   |   |   |    | 2   | 2   |
| <b>B.1.213</b>    |   |   |   |   |    | 1   | 1   |
| <b>B.1.214</b>    |   |   | 1 |   |    | 4   | 5   |
| <b>B.1.214.2</b>  | 2 | 2 | 2 | 1 | 3  | 28  | 38  |
| <b>B.1.221</b>    |   |   | 1 | 1 | 3  | 47  | 52  |
| <b>B.1.236</b>    |   |   |   |   |    | 5   | 5   |
| <b>B.1.247</b>    |   |   |   |   |    | 1   | 1   |
| <b>B.1.258</b>    | 2 |   | 1 | 2 | 3  | 59  | 67  |
| <b>B.1.258.14</b> |   |   |   |   |    | 5   | 5   |
| <b>B.1.258.17</b> |   |   |   | 1 | 1  | 10  | 12  |
| <b>B.1.351</b>    |   | 2 |   |   |    | 4   | 6   |
| <b>B.1.36</b>     |   |   |   |   | 1  | 10  | 11  |
| <b>B.1.36.1</b>   |   |   | 1 |   | 1  | 10  | 12  |
| <b>B.1.36.17</b>  |   |   |   |   |    | 11  | 11  |
| <b>B.1.36.35</b>  |   |   |   |   |    | 6   | 6   |
| <b>B.1.367</b>    |   |   |   | 1 |    |     | 1   |
| <b>B.1.400</b>    |   |   | 1 |   |    |     | 1   |
| <b>B.1.416</b>    |   |   |   |   |    | 2   | 2   |
| <b>B.1.416.1</b>  |   |   |   | 2 |    | 12  | 14  |
| <b>B.1.474</b>    |   |   |   |   |    | 1   | 1   |
| <b>B.1.480</b>    |   |   |   | 1 |    | 2   | 3   |



|                  |    |    |    |    |     |      |      |
|------------------|----|----|----|----|-----|------|------|
| <b>B.1.509</b>   |    |    |    |    |     | 5    | 5    |
| <b>B.1.525</b>   |    |    |    |    |     | 1    | 1    |
| <b>B.1.617.2</b> |    |    | 3  | 1  |     | 9    | 13   |
| <b>B.1.620</b>   |    |    |    |    |     | 1    | 1    |
| <b>B.1.8</b>     |    |    |    |    |     | 1    | 1    |
| <b>B.1.88</b>    |    |    |    |    | 1   | 14   | 15   |
| <b>B.1.98</b>    |    |    |    |    |     | 1    | 1    |
| <b>C.16</b>      |    |    |    |    |     | 2    | 2    |
| <b>C.4</b>       |    |    |    |    |     | 1    | 1    |
| <b>P.1</b>       |    |    |    |    |     | 4    | 4    |
| <b>P.1.2</b>     |    |    |    |    |     | 2    | 2    |
| <b>P.2</b>       |    |    | 1  |    |     | 2    | 3    |
| <b>Total</b>     | 23 | 14 | 72 | 76 | 101 | 1406 | 1692 |

**Table S8.** Summary of SARS-CoV-2 lineages and cases per lineage detected in different educational institutions from 01.10.2020 to 31.12.2020.

|                  | Daycare | Kindergarten | Elementary | secondary_I | secondary_II | adults | Total |
|------------------|---------|--------------|------------|-------------|--------------|--------|-------|
| <b>B</b>         |         |              |            |             |              | 1      | 1     |
| <b>B.1</b>       |         |              |            | 1           | 2            | 12     | 15    |
| <b>B.1.1</b>     |         |              |            | 1           |              | 5      | 6     |
| <b>B.1.1.1</b>   |         |              |            |             |              | 4      | 4     |
| <b>B.1.1.144</b> |         |              |            |             |              | 1      | 1     |
| <b>B.1.1.153</b> |         |              |            |             |              | 4      | 4     |
| <b>B.1.1.170</b> |         |              |            |             | 1            |        | 1     |
| <b>B.1.1.186</b> |         |              |            |             |              | 1      | 1     |
| <b>B.1.1.189</b> |         |              | 2          |             | 1            | 6      | 9     |
| <b>B.1.1.194</b> |         |              |            |             |              | 1      | 1     |
| <b>B.1.1.220</b> |         |              |            |             |              | 1      | 1     |
| <b>B.1.1.247</b> |         |              |            |             |              | 1      | 1     |
| <b>B.1.1.250</b> |         |              |            |             |              | 1      | 1     |
| <b>B.1.1.269</b> |         |              |            |             | 1            | 1      | 2     |
| <b>B.1.1.277</b> |         |              |            |             |              | 2      | 2     |
| <b>B.1.1.288</b> |         |              |            |             |              | 5      | 5     |
| <b>B.1.1.29</b>  |         |              |            |             |              | 9      | 9     |
| <b>B.1.1.297</b> |         |              |            |             |              | 2      | 2     |

|                   |   |  |   |   |    |     |     |
|-------------------|---|--|---|---|----|-----|-----|
| <b>B.1.1.37</b>   |   |  |   |   |    | 2   | 2   |
| <b>B.1.1.39</b>   |   |  | 4 | 3 | 7  | 71  | 85  |
| <b>B.1.1.47</b>   |   |  |   |   |    | 4   | 4   |
| <b>B.1.1.54</b>   |   |  |   |   |    | 1   | 1   |
| <b>B.1.1.7</b>    |   |  | 1 |   |    | 5   | 6   |
| <b>B.1.1.70</b>   |   |  |   | 3 |    | 13  | 16  |
| <b>B.1.1.84</b>   |   |  |   |   |    | 1   | 1   |
| <b>B.1.1.99</b>   |   |  |   |   | 1  | 3   | 4   |
| <b>B.1.160</b>    | 1 |  | 5 | 5 | 11 | 170 | 192 |
| <b>B.1.160.10</b> |   |  |   |   |    | 1   | 1   |
| <b>B.1.160.12</b> |   |  |   |   |    | 1   | 1   |
| <b>B.1.160.16</b> |   |  |   |   | 1  |     | 1   |
| <b>B.1.160.20</b> |   |  |   |   |    | 9   | 9   |
| <b>B.1.160.30</b> |   |  |   |   |    | 1   | 1   |
| <b>B.1.160.32</b> |   |  |   |   |    | 1   | 1   |
| <b>B.1.177</b>    | 2 |  | 2 | 8 | 11 | 186 | 209 |
| <b>B.1.177.23</b> |   |  |   | 1 | 1  | 11  | 13  |
| <b>B.1.177.43</b> |   |  |   |   |    | 1   | 1   |
| <b>B.1.177.44</b> |   |  |   |   |    | 1   | 1   |
| <b>B.1.213</b>    |   |  |   |   |    | 1   | 1   |
| <b>B.1.221</b>    |   |  | 1 | 1 | 2  | 30  | 34  |
| <b>B.1.236</b>    |   |  |   |   |    | 4   | 4   |
| <b>B.1.247</b>    |   |  |   |   |    | 1   | 1   |
| <b>B.1.258</b>    | 2 |  | 1 | 2 | 3  | 47  | 55  |
| <b>B.1.258.14</b> |   |  |   |   |    | 4   | 4   |
| <b>B.1.258.17</b> |   |  |   |   |    | 1   | 1   |
| <b>B.1.36</b>     |   |  |   |   |    | 7   | 7   |
| <b>B.1.36.1</b>   |   |  | 1 |   | 1  | 7   | 9   |
| <b>B.1.36.17</b>  |   |  |   |   |    | 11  | 11  |
| <b>B.1.367</b>    |   |  |   | 1 |    |     | 1   |
| <b>B.1.400</b>    |   |  | 1 |   |    |     | 1   |
| <b>B.1.416</b>    |   |  |   |   |    | 2   | 2   |
| <b>B.1.416.1</b>  |   |  |   | 2 |    | 12  | 14  |
| <b>B.1.474</b>    |   |  |   |   |    | 1   | 1   |
| <b>B.1.480</b>    |   |  |   | 1 |    | 2   | 3   |
| <b>B.1.509</b>    |   |  |   |   |    | 5   | 5   |

|               |   |   |    |    |    |     |     |
|---------------|---|---|----|----|----|-----|-----|
| <b>B.1.88</b> |   |   |    |    | 1  | 14  | 15  |
| <b>B.1.98</b> |   |   |    |    |    | 1   | 1   |
| <b>P.2</b>    |   |   |    |    |    | 1   | 1   |
| <b>Total</b>  | 5 | 0 | 18 | 29 | 44 | 690 | 786 |

**Table S9.** Summary of SARS-CoV-2 lineages and cases per lineage detected in different educational institutions from 01.01.2021 to 28.02.2021.

|                   | Daycare | Kindergarten | Elementary | secondary_I | secondary_II | adults | Total |
|-------------------|---------|--------------|------------|-------------|--------------|--------|-------|
| <b>B.1</b>        |         |              |            | 1           |              | 3      | 4     |
| <b>B.1.1</b>      |         |              |            |             |              | 2      | 2     |
| <b>B.1.1.117</b>  |         |              |            |             |              | 1      | 1     |
| <b>B.1.1.130</b>  |         |              |            |             |              | 1      | 1     |
| <b>B.1.1.135</b>  |         |              |            |             |              | 1      | 1     |
| <b>B.1.1.141</b>  |         |              |            |             |              | 1      | 1     |
| <b>B.1.1.250</b>  |         |              |            |             |              | 1      | 1     |
| <b>B.1.1.288</b>  |         |              |            |             |              | 1      | 1     |
| <b>B.1.1.29</b>   |         |              | 1          |             |              |        | 1     |
| <b>B.1.1.348</b>  |         |              |            |             |              | 1      | 1     |
| <b>B.1.1.39</b>   |         |              |            | 1           |              | 6      | 7     |
| <b>B.1.1.445</b>  |         |              |            |             |              | 1      | 1     |
| <b>B.1.1.47</b>   |         |              |            | 1           |              | 1      | 2     |
| <b>B.1.1.7</b>    | 5       | 1            | 11         | 5           | 2            | 79     | 103   |
| <b>B.1.1.70</b>   |         | 1            |            |             | 1            | 16     | 18    |
| <b>B.1.1.84</b>   |         |              |            |             |              | 1      | 1     |
| <b>B.1.146</b>    |         |              |            |             |              | 1      | 1     |
| <b>B.1.160</b>    |         |              | 1          | 1           | 2            | 31     | 35    |
| <b>B.1.160.14</b> |         |              |            |             |              | 1      | 1     |
| <b>B.1.160.16</b> |         |              |            | 1           |              | 1      | 2     |
| <b>B.1.160.19</b> |         |              |            |             |              | 1      | 1     |
| <b>B.1.160.20</b> |         |              |            |             |              | 2      | 2     |
| <b>B.1.160.30</b> |         |              |            |             |              | 1      | 1     |
| <b>B.1.177</b>    |         |              | 2          |             | 2            | 34     | 38    |
| <b>B.1.177.43</b> |         |              |            |             |              | 1      | 1     |
| <b>B.1.177.44</b> |         |              |            |             |              | 1      | 1     |
| <b>B.1.214</b>    |         |              | 1          |             |              | 4      | 5     |

|              |   |   |    |    |    |     |     |
|--------------|---|---|----|----|----|-----|-----|
| B.1.214.2    |   | 1 |    |    | 2  | 6   | 9   |
| B.1.221      |   |   |    |    | 1  | 17  | 18  |
| B.1.236      |   |   |    |    |    | 1   | 1   |
| B.1.258      |   |   |    |    |    | 11  | 11  |
| B.1.258.14   |   |   |    |    |    | 1   | 1   |
| B.1.258.17   |   |   |    |    |    | 3   | 3   |
| B.1.351      |   |   |    |    |    | 2   | 2   |
| B.1.36       |   |   |    |    | 1  | 3   | 4   |
| B.1.36.1     |   |   |    |    |    | 3   | 3   |
| B.1.36.35    |   |   |    |    |    | 3   | 3   |
| B.1.8        |   |   |    |    |    | 1   | 1   |
| C.16         |   |   |    |    |    | 2   | 2   |
| C.4          |   |   |    |    |    | 1   | 1   |
| P.2          |   |   | 1  |    |    | 1   | 2   |
| <b>Total</b> | 5 | 3 | 17 | 10 | 11 | 249 | 295 |

**Table S10.** Summary of SARS-CoV-2 lineages and cases per lineage detected in different educational institutions from 01.03.2021 to 31.05.2021.

|            | Daycare | Kindergarten | Elementary | secondary_I | secondary_II | adults | Total |
|------------|---------|--------------|------------|-------------|--------------|--------|-------|
| B.1        |         |              |            |             |              | 3      | 3     |
| B.1.1      |         |              |            |             |              | 4      | 4     |
| B.1.1.318  |         |              |            |             | 1            |        | 1     |
| B.1.1.39   |         |              |            |             |              | 1      | 1     |
| B.1.1.519  |         |              |            |             |              | 2      | 2     |
| B.1.1.7    | 11      | 8            | 32         | 34          | 43           | 402    | 530   |
| B.1.1.70   |         |              |            |             |              | 1      | 1     |
| B.1.160    |         |              |            |             |              | 1      | 1     |
| B.1.177.86 |         |              |            |             |              | 2      | 2     |
| B.1.214.2  | 2       | 1            | 2          | 1           | 1            | 22     | 29    |
| B.1.258    |         |              |            |             |              | 1      | 1     |
| B.1.258.17 |         |              |            | 1           | 1            | 6      | 8     |
| B.1.351    |         | 2            |            |             |              | 2      | 4     |
| B.1.36.35  |         |              |            |             |              | 3      | 3     |
| B.1.525    |         |              |            |             |              | 1      | 1     |

|                  |    |    |    |    |    |     |     |
|------------------|----|----|----|----|----|-----|-----|
| <b>B.1.617.2</b> |    |    | 3  | 1  |    | 9   | 13  |
| <b>B.1.620</b>   |    |    |    |    |    | 1   | 1   |
| <b>P.1</b>       |    |    |    |    |    | 4   | 4   |
| <b>P.1.2</b>     |    |    |    |    |    | 2   | 2   |
| <b>Total</b>     | 13 | 11 | 37 | 37 | 46 | 467 | 611 |
